# Supplementary material for: Genome scanning inspired isolation of reedsmycins A–F, polyene-polyol macrolides from Streptomyces sp. CHQ-64
Source: Royal Society of Chemistry journal article supplement (doi:10.1039/c4ra15415k), 2015-01-01

## Supplementary Data

# Genome Scanning Inspired Isolation of Reedsmycins A-F, Polyene-polyol Macrolides from *Streptomyces* sp. CHQ-64

Qian Che,<sup>\$a</sup> Tong Li,<sup>\$a</sup> Xiaofang Liu,<sup>a</sup> Tingting Yao,<sup>a</sup> Jing Li,<sup>b</sup> Qianqun Gu,<sup>a</sup> Dehai Li,<sup>\*a</sup> Wenli

Li,<sup>\*a</sup> and Tianjiao Zhu<sup>\*a</sup>

<sup>a</sup> Key Laboratory of Marine Drugs, Chinese Ministry of Education, School of Medicine and  
Pharmacy, Ocean University of China, Qingdao 266003, People's Republic of China

<sup>b</sup> College of Marine Life Sciences, Ocean University of China, Qingdao 266003, People's  
Republic of China

## List of Supporting Information

|                                                                                                                           |    |
|---------------------------------------------------------------------------------------------------------------------------|----|
| <b>Table S1.</b> Alignment of the conserved motifs in KR domains.....                                                     | 5  |
| <b>Figure S1.</b> <sup>1</sup> H NMR Spectrum (400 MHz) of reedsmycin A ( <b>1</b> ) in DMSO-d <sub>6</sub> .....         | 6  |
| <b>Figure S2.</b> <sup>13</sup> C NMR Spectrum (100 MHz) of reedsmycin A ( <b>1</b> ) in DMSO-d <sub>6</sub> .....        | 7  |
| <b>Figure S3.</b> DEPT Spectrum (100 MHz) of reedsmycin A ( <b>1</b> ) in DMSO-d <sub>6</sub> .....                       | 8  |
| <b>Figure S4.</b> HMQC Spectrum of reedsmycin A ( <b>1</b> ) in DMSO-d <sub>6</sub> .....                                 | 9  |
| <b>Figure S5.</b> <sup>1</sup> H- <sup>1</sup> H COSY Spectrum of reedsmycin A ( <b>1</b> ) in DMSO-d <sub>6</sub> .....  | 10 |
| <b>Figure S6.</b> HMBC Spectrum of reedsmycin A ( <b>1</b> ) in DMSO-d <sub>6</sub> .....                                 | 11 |
| <b>Figure S7.</b> NOESY Spectrum of reedsmycin A ( <b>1</b> ) in DMSO-d <sub>6</sub> .....                                | 12 |
| <b>Figure S8.</b> HRESIMS Spectrum of reedsmycin A ( <b>1</b> ) .....                                                     | 13 |
| <b>Figure S9.</b> IR Spectrum of reedsmycin A ( <b>1</b> ) .....                                                          | 14 |
| <b>Figure S10.</b> <sup>1</sup> H NMR Spectrum (600 MHz) of reedsmycin B ( <b>2</b> ) in DMSO-d <sub>6</sub> .....        | 15 |
| <b>Figure S11.</b> <sup>13</sup> C NMR Spectrum (150 MHz) of reedsmycin B ( <b>2</b> ) in DMSO-d <sub>6</sub> .....       | 16 |
| <b>Figure S12.</b> DEPT Spectrum (150 MHz) of reedsmycin B ( <b>2</b> ) in DMSO-d <sub>6</sub> .....                      | 17 |
| <b>Figure S13.</b> HMQC Spectrum of reedsmycin B ( <b>2</b> ) in DMSO-d <sub>6</sub> .....                                | 18 |
| <b>Figure S14.</b> <sup>1</sup> H- <sup>1</sup> H COSY Spectrum of reedsmycin B ( <b>2</b> ) in DMSO-d <sub>6</sub> ..... | 19 |
| <b>Figure S15.</b> HMBC Spectrum of reedsmycin B ( <b>2</b> ) in DMSO-d <sub>6</sub> .....                                | 20 |
| <b>Figure S16.</b> HRESIMS Spectrum of reedsmycin B ( <b>2</b> ).....                                                     | 21 |
| <b>Figure S17.</b> IR Spectrum of reedsmycin B ( <b>2</b> ).....                                                          | 22 |
| <b>Figure S18.</b> <sup>1</sup> H NMR Spectrum (600 MHz) of reedsmycin C ( <b>3</b> ) in DMSO-d <sub>6</sub> .....        | 23 |
| <b>Figure S19.</b> <sup>13</sup> C NMR Spectrum (150 MHz) of reedsmycin C ( <b>3</b> ) in DMSO-d <sub>6</sub> .....       | 24 |

|                                                                                                                           |    |
|---------------------------------------------------------------------------------------------------------------------------|----|
| <b>Figure S20.</b> DEPT Spectrum (150 MHz) of reedsmycin C ( <b>3</b> ) in DMSO-d <sub>6</sub> .....                      | 25 |
| <b>Figure S21.</b> HMQC Spectrum of reedsmycin C ( <b>3</b> ) in DMSO-d <sub>6</sub> .....                                | 26 |
| <b>Figure S22.</b> <sup>1</sup> H- <sup>1</sup> H COSY Spectrum of reedsmycin C ( <b>3</b> ) in DMSO-d <sub>6</sub> ..... | 27 |
| <b>Figure S23.</b> HMBC Spectrum of reedsmycin C ( <b>3</b> ) in DMSO-d <sub>6</sub> .....                                | 28 |
| <b>Figure S24.</b> HRESIMS Spectrum of reedsmycin C ( <b>3</b> ).....                                                     | 29 |
| <b>Figure S25.</b> IR Spectrum of reedsmycin C ( <b>3</b> ).....                                                          | 30 |
| <b>Figure S26.</b> <sup>1</sup> H NMR Spectrum (600 MHz) of reedsmycin D ( <b>4</b> ) in DMSO-d <sub>6</sub> .....        | 31 |
| <b>Figure S27.</b> <sup>13</sup> C NMR Spectrum (150 MHz) of reedsmycin D ( <b>4</b> ) in DMSO-d <sub>6</sub> .....       | 32 |
| <b>Figure S28.</b> DEPT Spectrum (150 MHz) of reedsmycin D ( <b>4</b> ) in DMSO-d <sub>6</sub> .....                      | 33 |
| <b>Figure S29.</b> HMQC Spectrum of reedsmycin D ( <b>4</b> ) in DMSO-d <sub>6</sub> .....                                | 34 |
| <b>Figure S30.</b> <sup>1</sup> H- <sup>1</sup> H COSY Spectrum of reedsmycin D ( <b>4</b> ) in DMSO-d <sub>6</sub> ..... | 35 |
| <b>Figure S31.</b> HMBC Spectrum of reedsmycin D ( <b>4</b> ) in DMSO-d <sub>6</sub> .....                                | 36 |
| <b>Figure S32.</b> HRESIMS Spectrum of reedsmycin D ( <b>4</b> ).....                                                     | 37 |
| <b>Figure S33.</b> IR Spectrum of reedsmycin D ( <b>4</b> ). .....                                                        | 38 |
| <b>Figure S34.</b> <sup>1</sup> H NMR Spectrum (400 MHz) of reedsmycin E ( <b>5</b> ) in DMSO-d <sub>6</sub> .....        | 39 |
| <b>Figure S35.</b> <sup>13</sup> C NMR Spectrum (100 MHz) of reedsmycin E ( <b>5</b> ) in DMSO-d <sub>6</sub> .....       | 40 |
| <b>Figure S36.</b> DEPT Spectrum (100 MHz) of reedsmycin E ( <b>5</b> ) in DMSO-d <sub>6</sub> .....                      | 41 |
| <b>Figure S37.</b> HMQC Spectrum of reedsmycin E ( <b>5</b> ) in DMSO-d <sub>6</sub> .....                                | 42 |
| <b>Figure S38.</b> <sup>1</sup> H- <sup>1</sup> H COSY Spectrum of reedsmycin E ( <b>5</b> ) in DMSO-d <sub>6</sub> ..... | 43 |
| <b>Figure S39.</b> HMBC Spectrum of reedsmycin E ( <b>5</b> ) in DMSO-d <sub>6</sub> .....                                | 44 |
| <b>Figure S40.</b> HRESIMS Spectrum of reedsmycin E ( <b>5</b> ).....                                                     | 45 |
| <b>Figure S41.</b> IR Spectrum of reedsmycin E ( <b>5</b> ).....                                                          | 46 |

|                                                                                                                      |    |
|----------------------------------------------------------------------------------------------------------------------|----|
| <b>Figure S42.</b> $^1\text{H}$ NMR Spectrum (600 MHz) of reedsmycin F ( <b>6</b> ) in $\text{DMSO-d}_6$ .....       | 47 |
| <b>Figure S43.</b> $^{13}\text{C}$ NMR Spectrum (150 MHz) of reedsmycin F ( <b>6</b> ) in $\text{DMSO-d}_6$ .....    | 48 |
| <b>Figure S44.</b> DEPT Spectrum (150 MHz) of reedsmycin F ( <b>6</b> ) in $\text{DMSO-d}_6$ .....                   | 49 |
| <b>Figure S45.</b> HMQC Spectrum of reedsmycin F ( <b>6</b> ) in $\text{DMSO-d}_6$ .....                             | 50 |
| <b>Figure S46.</b> $^1\text{H}$ - $^1\text{H}$ COSY Spectrum of reedsmycin F ( <b>6</b> ) in $\text{DMSO-d}_6$ ..... | 51 |
| <b>Figure S47.</b> HMBC Spectrum of reedsmycin F ( <b>6</b> ) in $\text{DMSO-d}_6$ .....                             | 52 |
| <b>Figure S48.</b> HRESIMS Spectrum of reedsmycin F ( <b>6</b> ).....                                                | 53 |
| <b>Figure S49.</b> IR Spectrum of reedsmycin F ( <b>6</b> ).....                                                     | 54 |
| <b>Figure S50.</b> The HPLC profiles for the crude mixture and the fraction 7.....                                   | 55 |
| <b>Figure S51.</b> The TLC profiles for the crude extract and fraction 7.....                                        | 56 |

**Table S1.** Alignment of the conserved motifs in KR domains

| Domain | Motif I                | Motif II                     | Type | Predicted configuration |
|--------|------------------------|------------------------------|------|-------------------------|
| KR1    | AAGVSHYRLLGDL          | IAGV <b>W</b> GSAGDGAYAAANAF | A    | S-OH                    |
| KR2    | AAGVSRNGLLGDL          | IAGV <b>W</b> GSAGDGAYAAANAF | A    | S-OH                    |
| KR3    | AAGVSRAMLLGDL          | IAGV <b>W</b> GAAGDGAYAVANAF | A    | S-OH                    |
| KR4    | TAGV <b>I</b> DDGILTSL | TSGLFGASGQANYAAANTF          | B    | <i>E/Z</i>              |
| KR5    | AAGV <b>L</b> EDGVFSSL | AAGVLGNAGQAAYGAANAY          | B    | <i>E/Z</i>              |
| KR6    | AAGV <b>L</b> EDGVFSSL | AAGVLGNAGQAAYGAANAY          | B    | <i>E/Z</i>              |

**Figure S1.**  $^1\text{H}$  NMR Spectrum (400 MHz) of reedsmycin A (**1**) in  $\text{DMSO-d}_6$

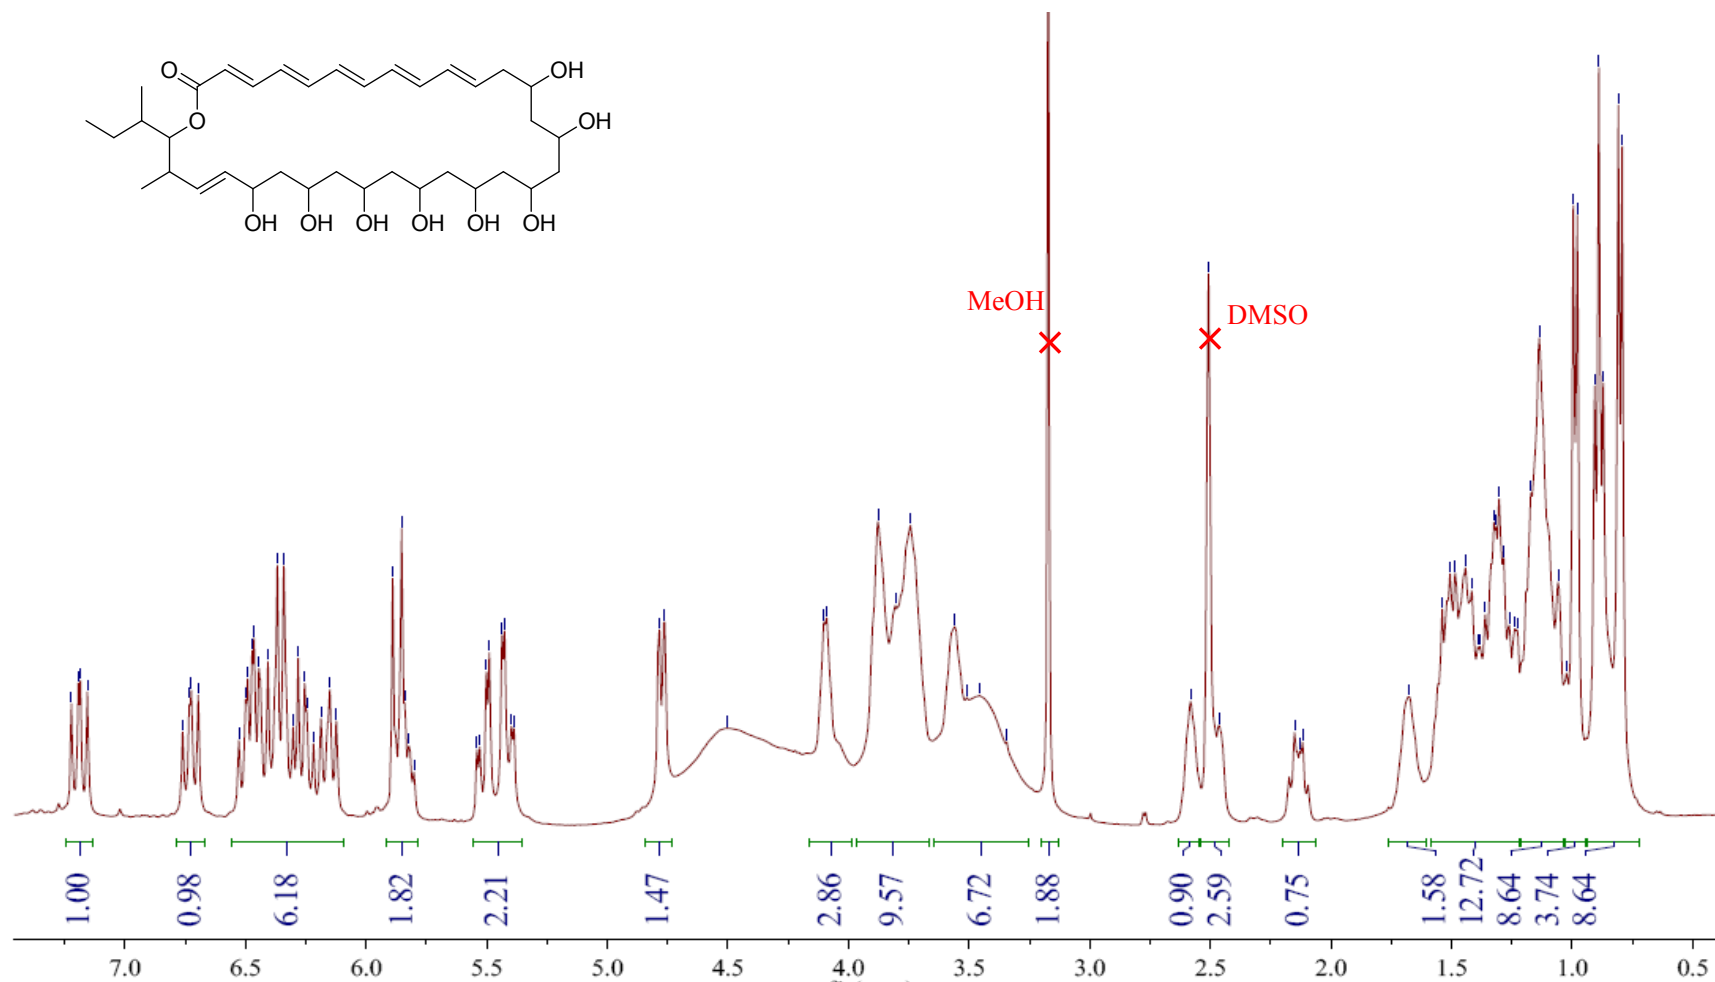

**Figure S2.**  $^{13}\text{C}$  NMR Spectrum (100 MHz) of reedsmycin A (1) in  $\text{DMSO-d}_6$

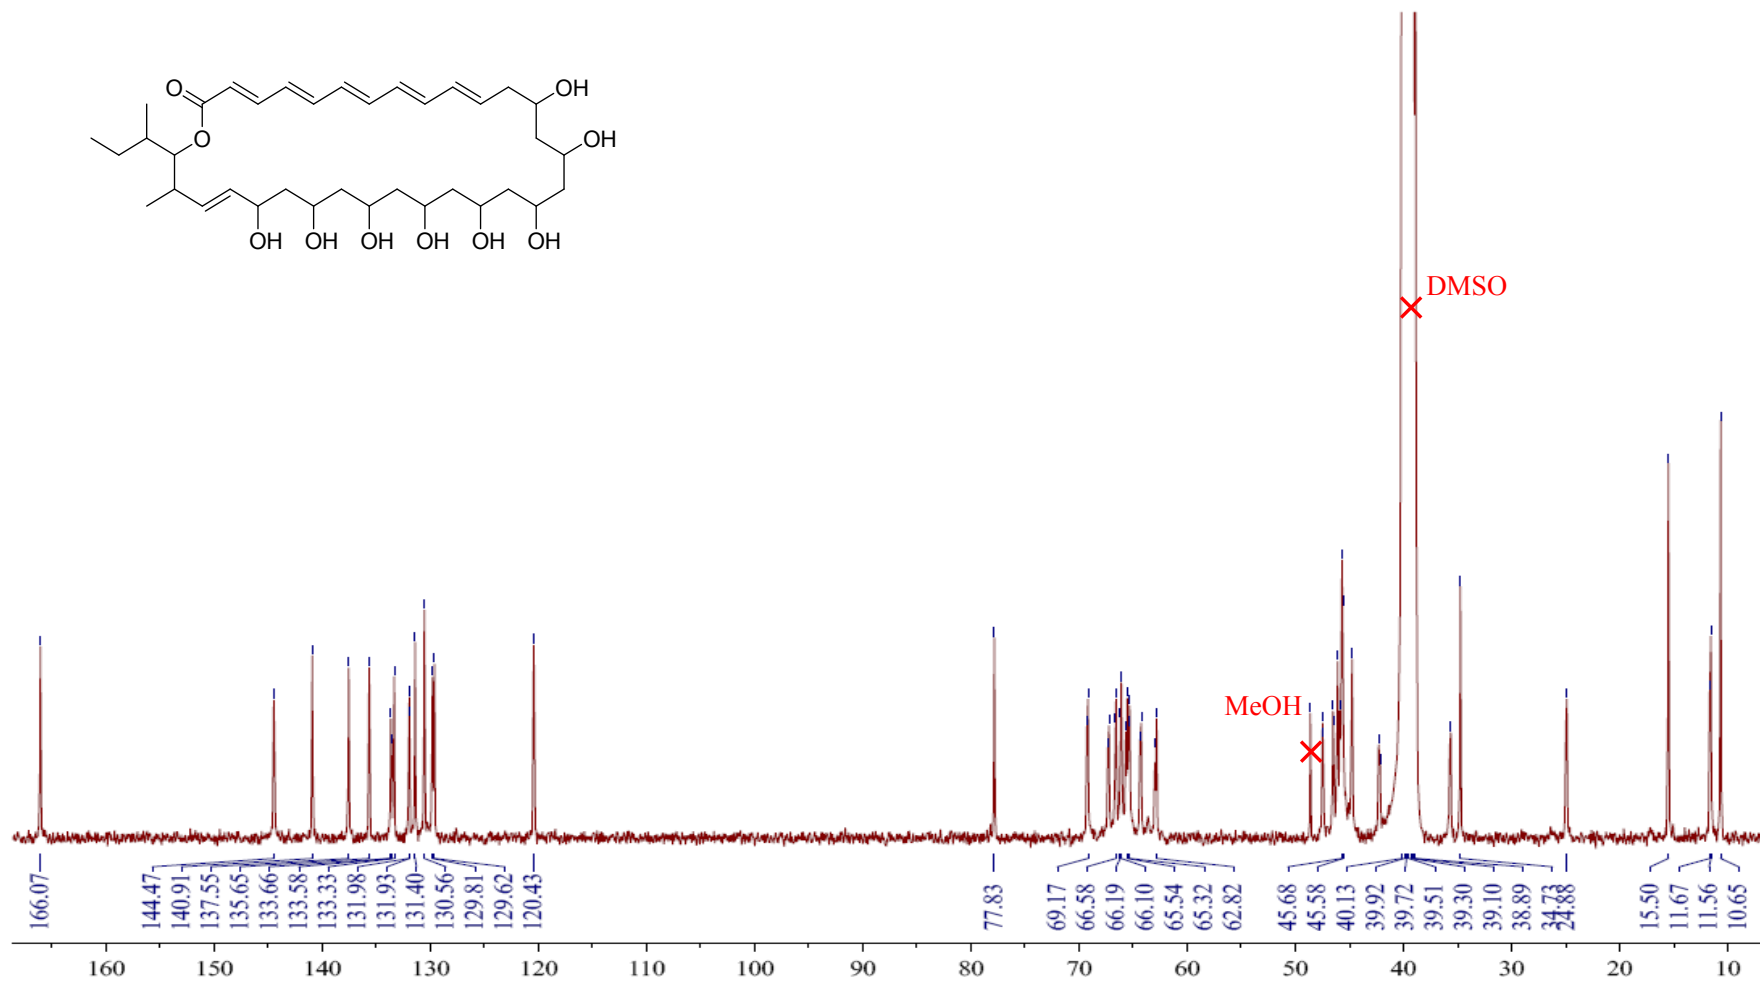

**Figure S3.** DEPT Spectrum (100 MHz) of reedsmycin A (**1**) in DMSO-d<sub>6</sub>

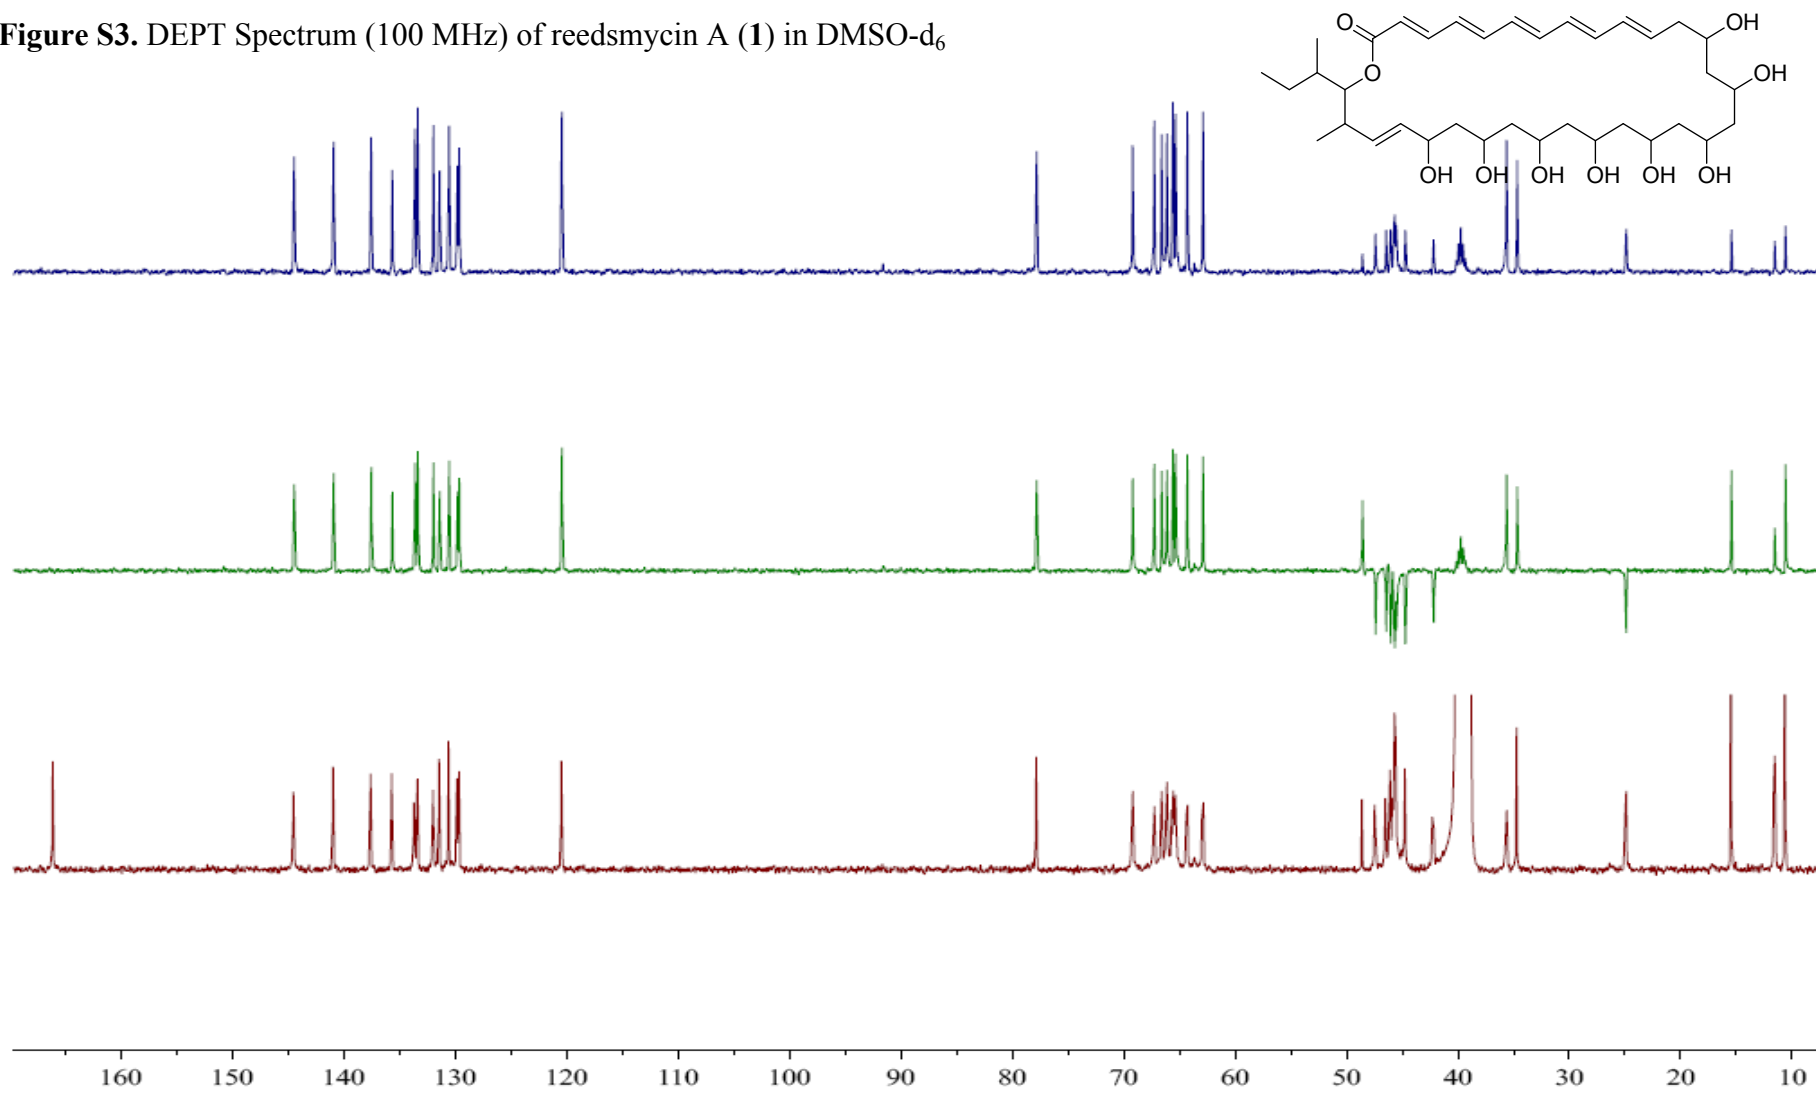



**Figure S4.** HMQC Spectrum of reedsmycin A (**1**) in DMSO-d<sub>6</sub>

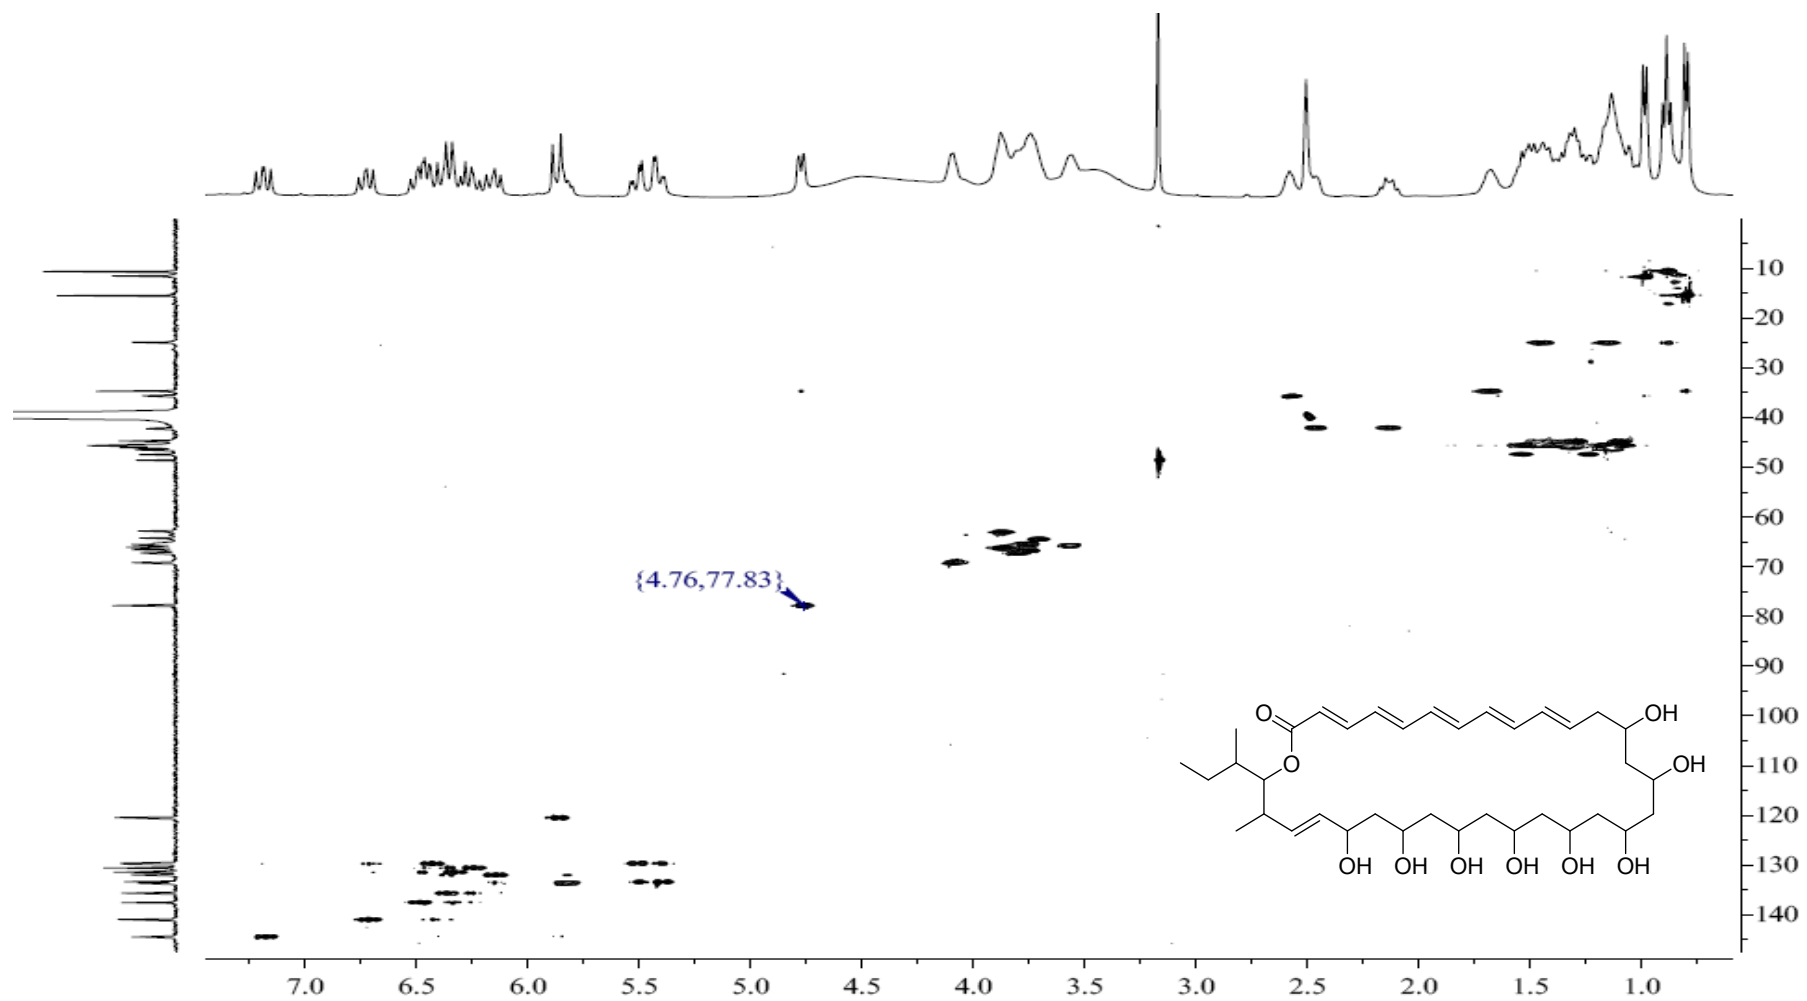

**Figure S5.**  $^1\text{H}$ - $^1\text{H}$  COSY Spectrum of reedsmycin A (**1**) in  $\text{DMSO-d}_6$

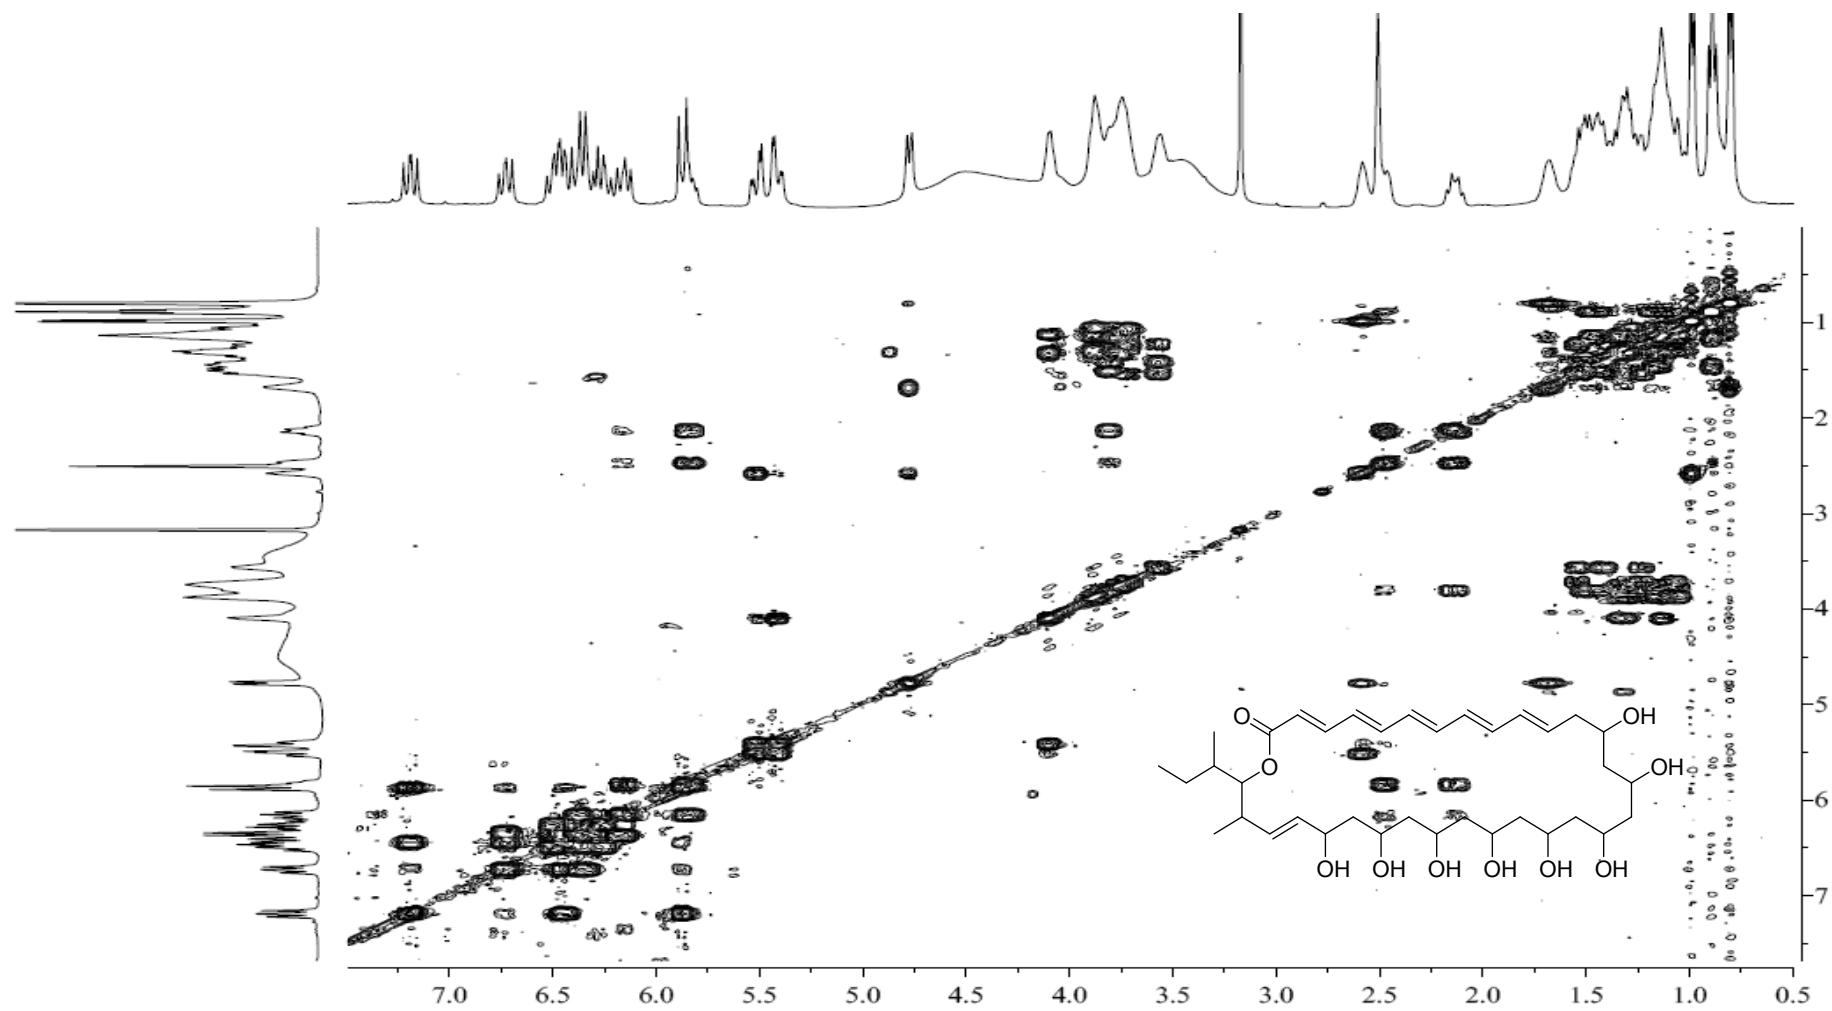

**Figure S6.** HMBC Spectrum of reedsmycin A (**1**) in DMSO-d<sub>6</sub>

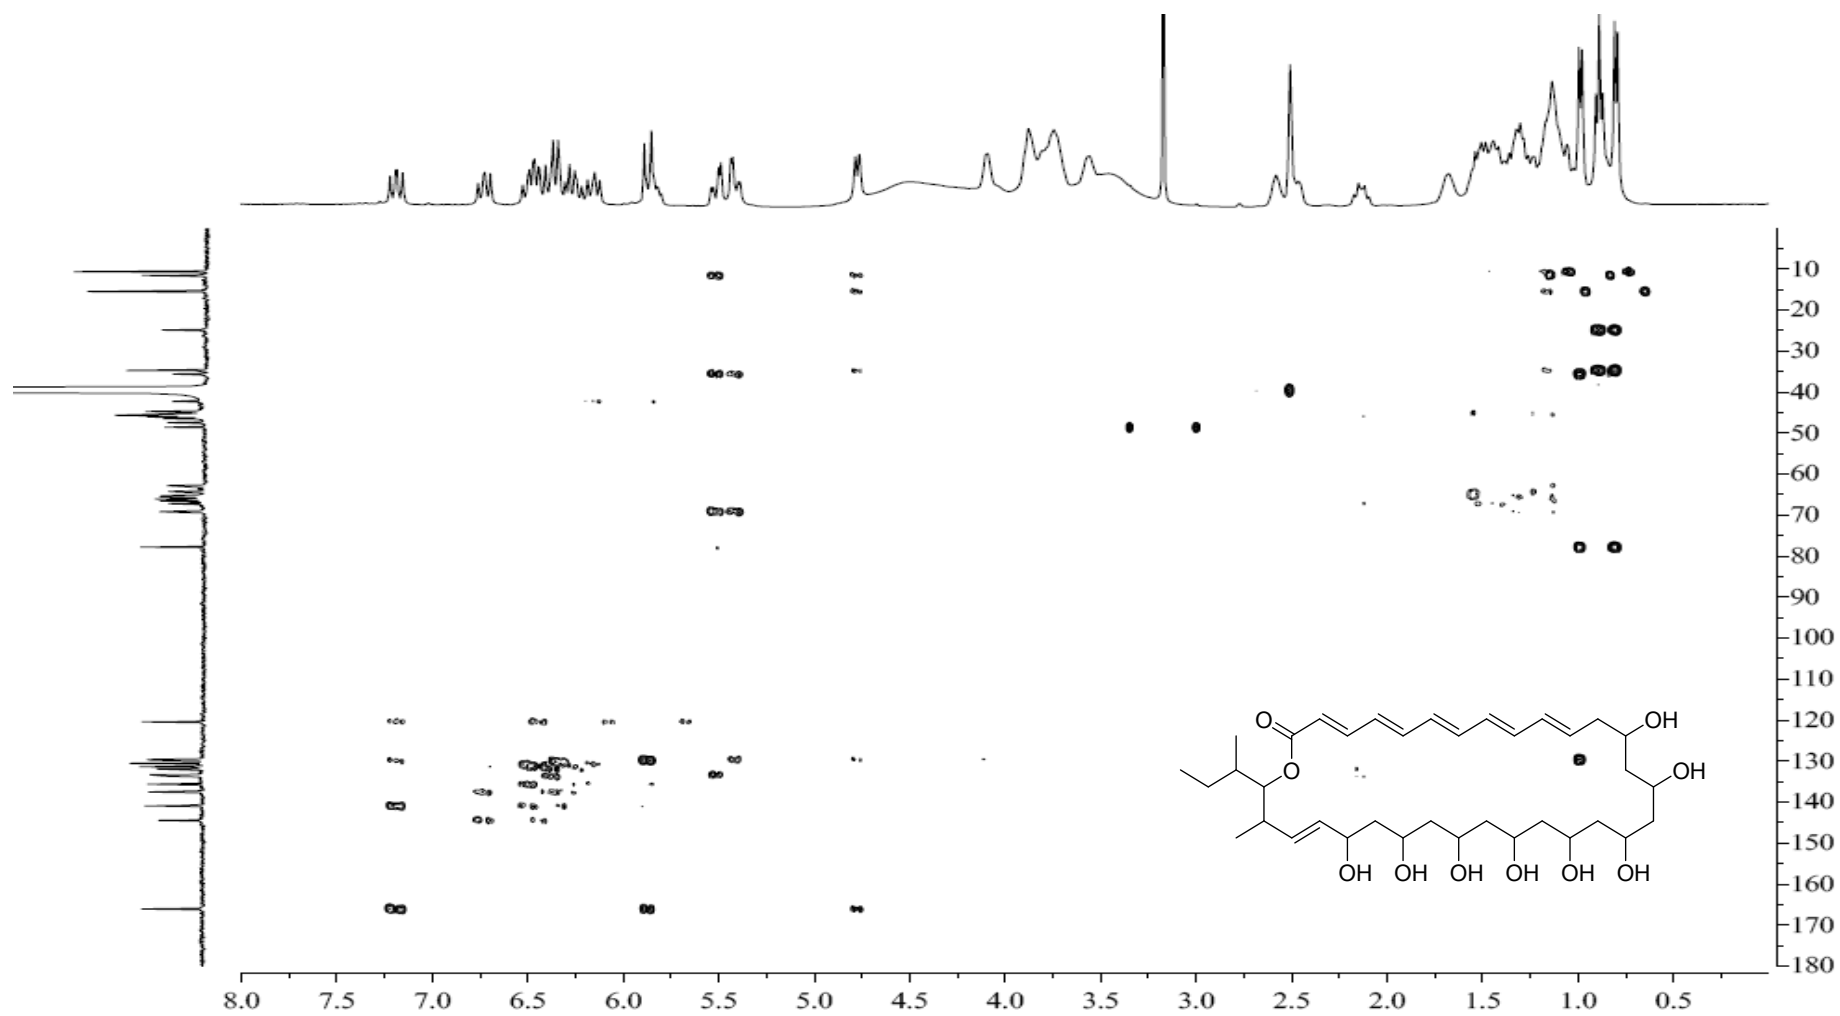

Figure S7. NOESY Spectrum of reedsmycin A (1) in DMSO-d<sub>6</sub>

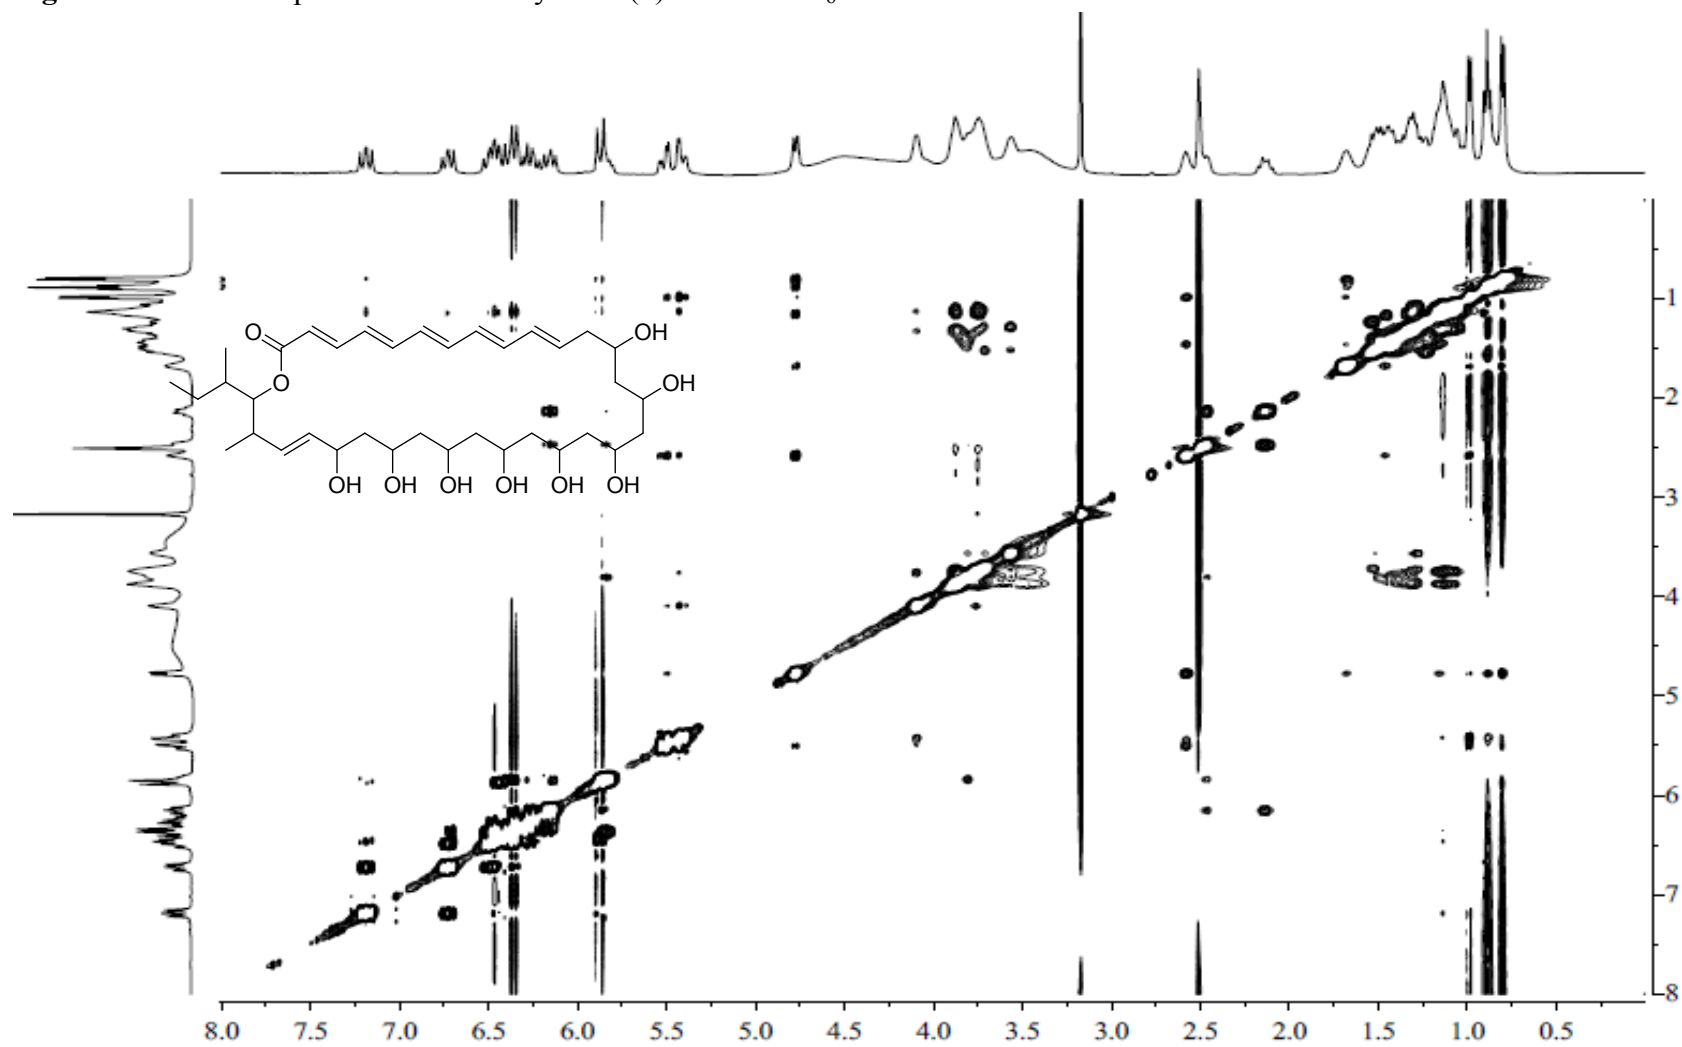

Figure S8. HRESIMS Spectrum of reedsmycin A (1)

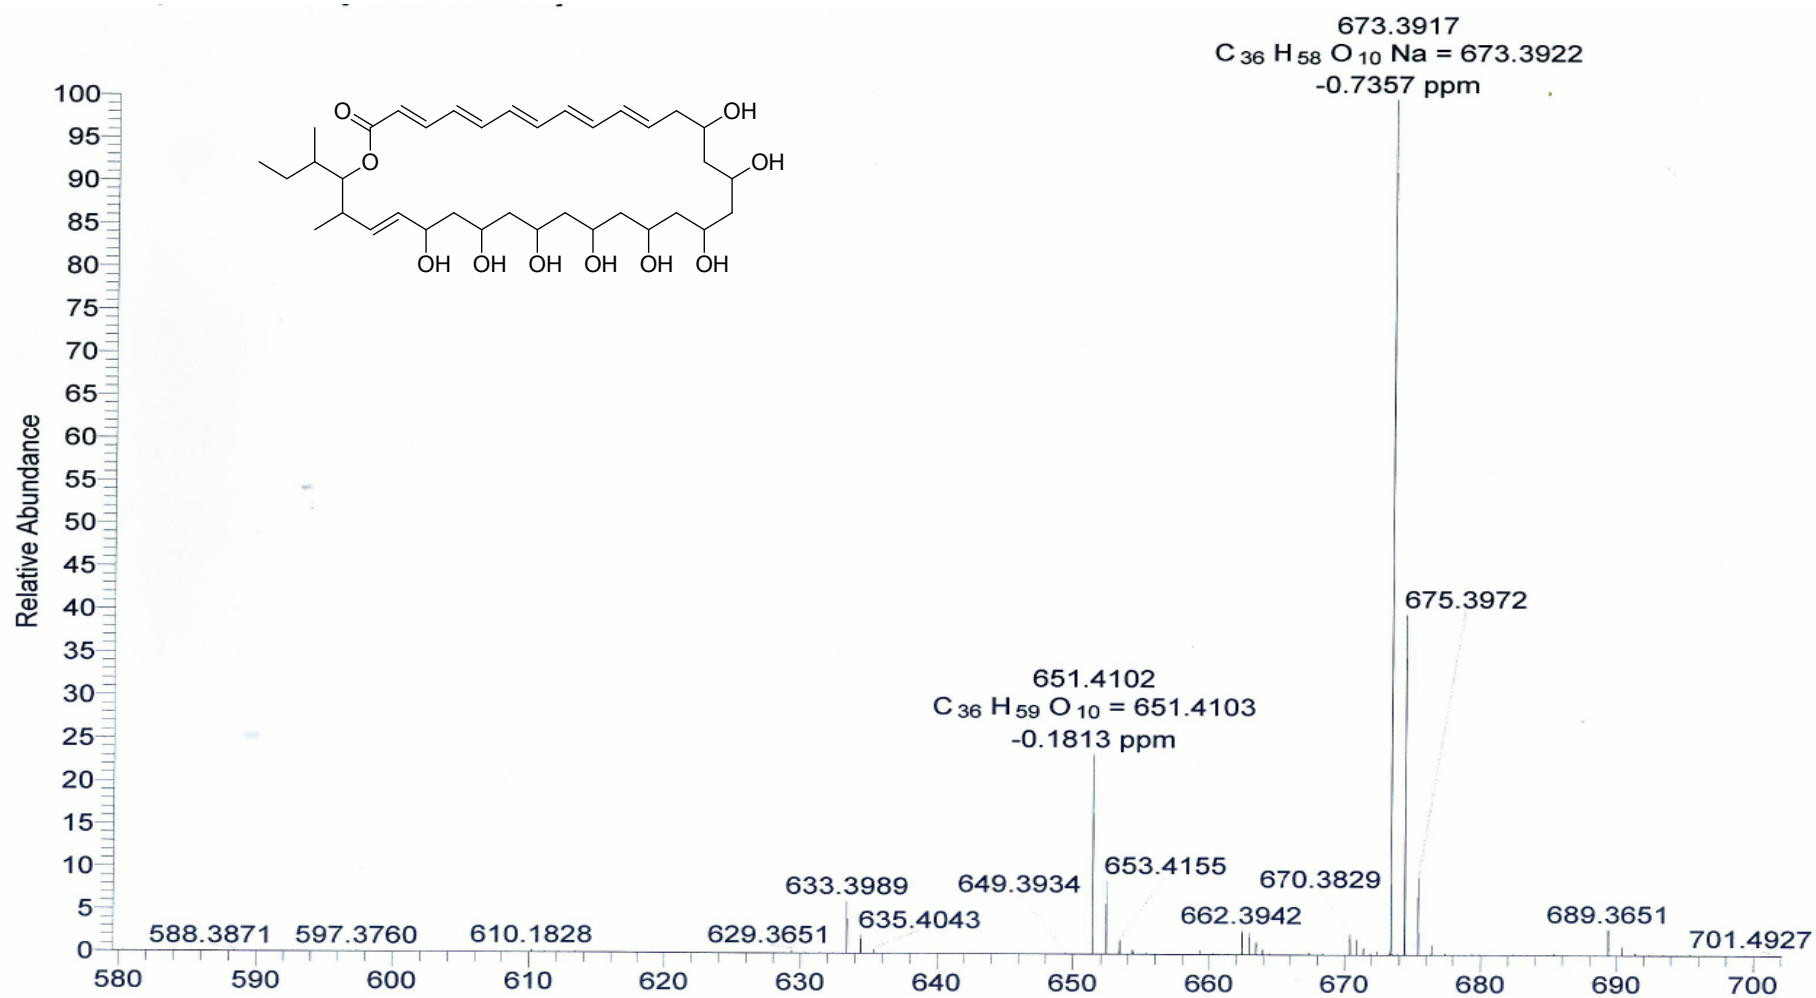

**Figure S9.** IR Spectrum of reedsmycin A (1)

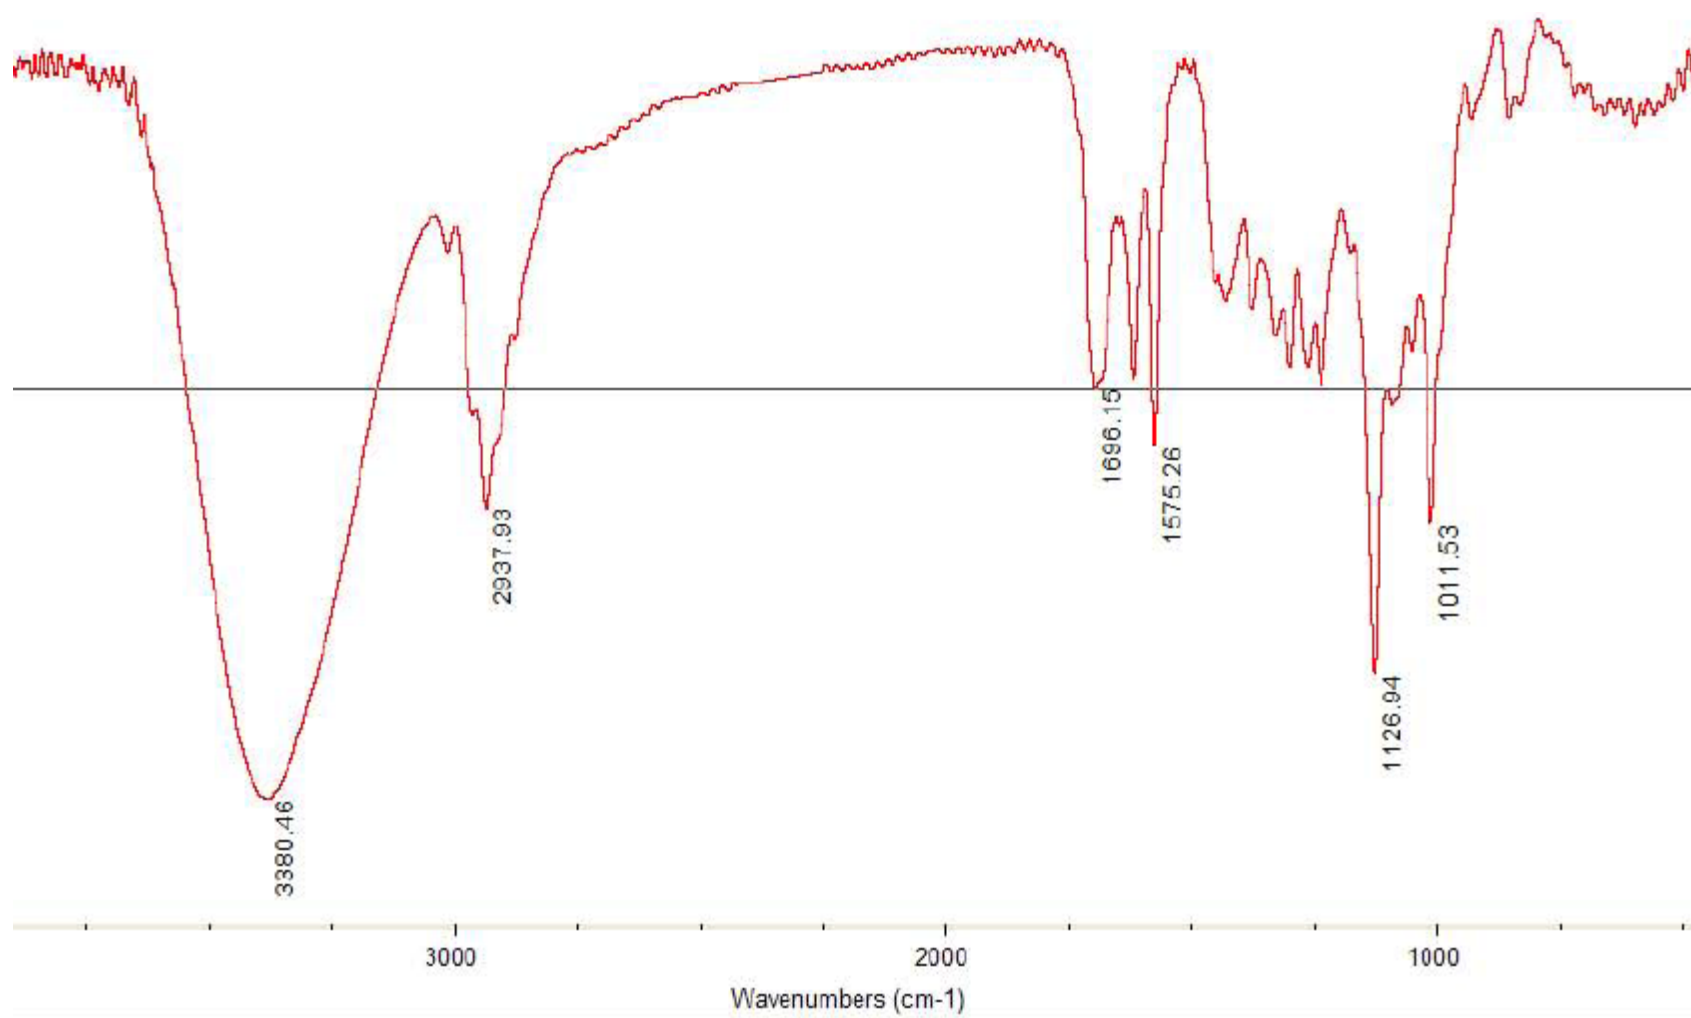

**Figure S10.**  $^1\text{H}$  NMR Spectrum (600 MHz) of reedsmycin B (**2**) in  $\text{DMSO-d}_6$

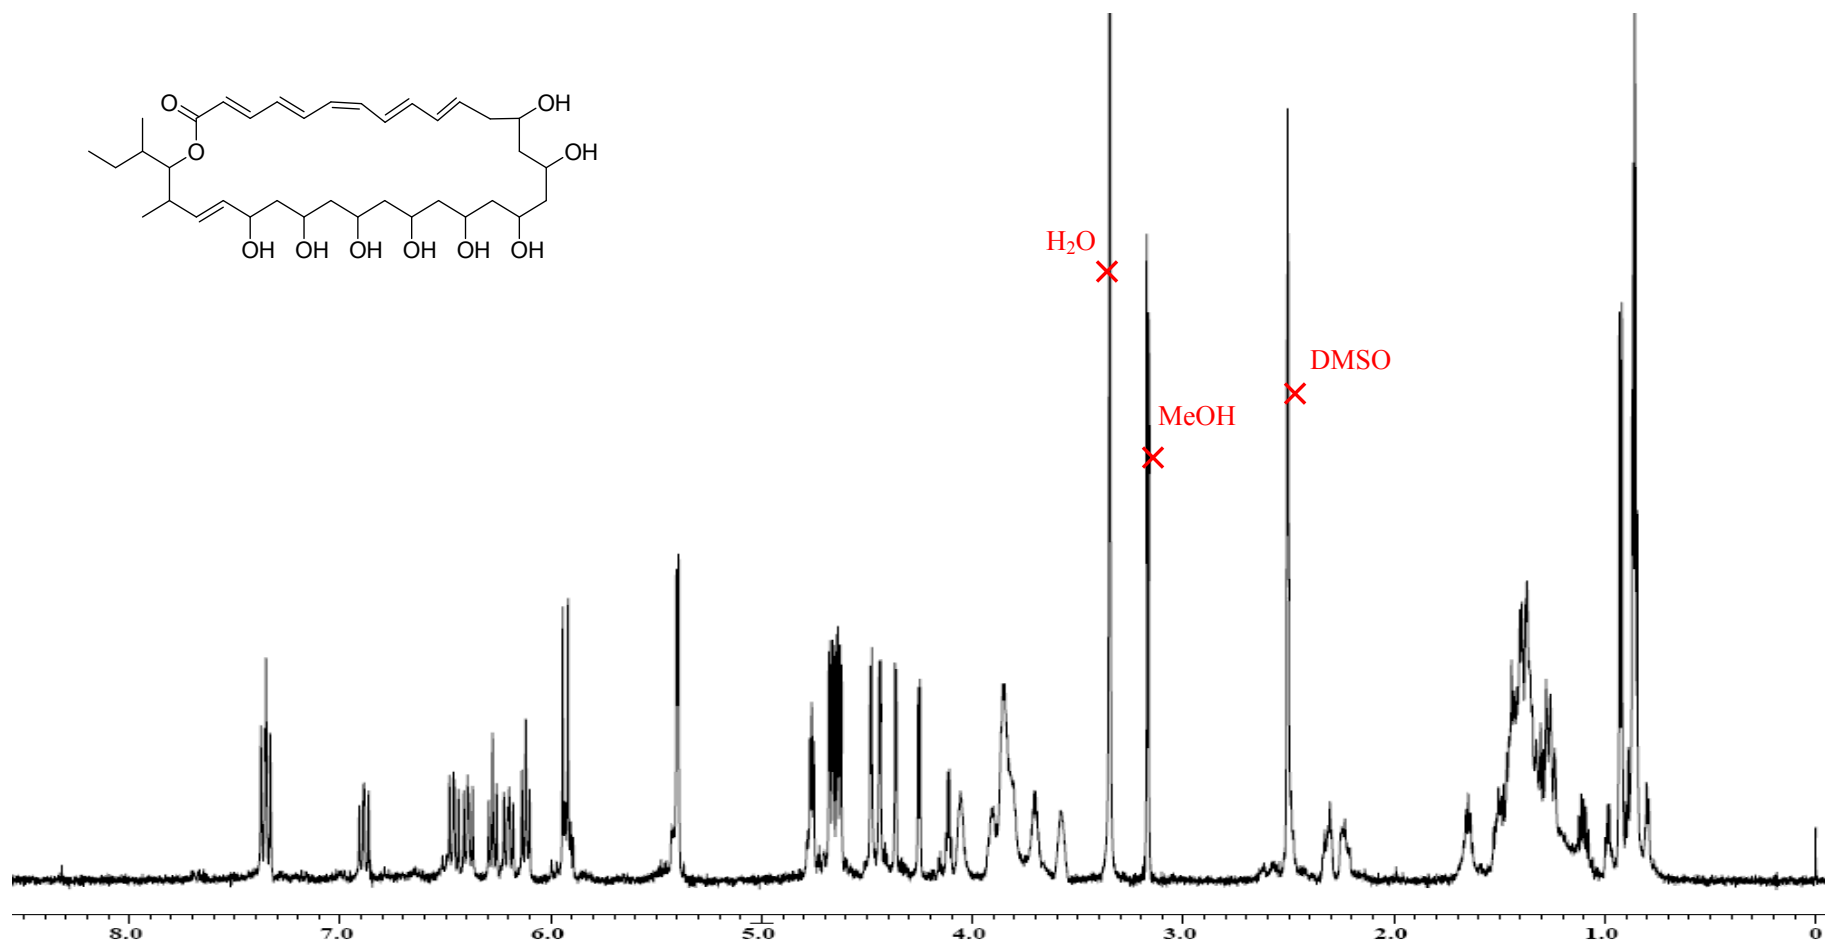

**Figure S11.**  $^{13}\text{C}$  NMR Spectrum (150 MHz) of reedsmycin B (**2**) in  $\text{DMSO-d}_6$

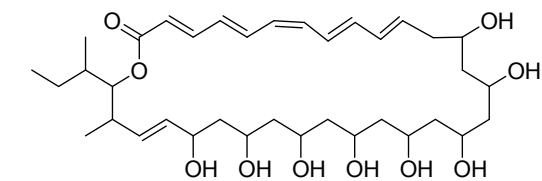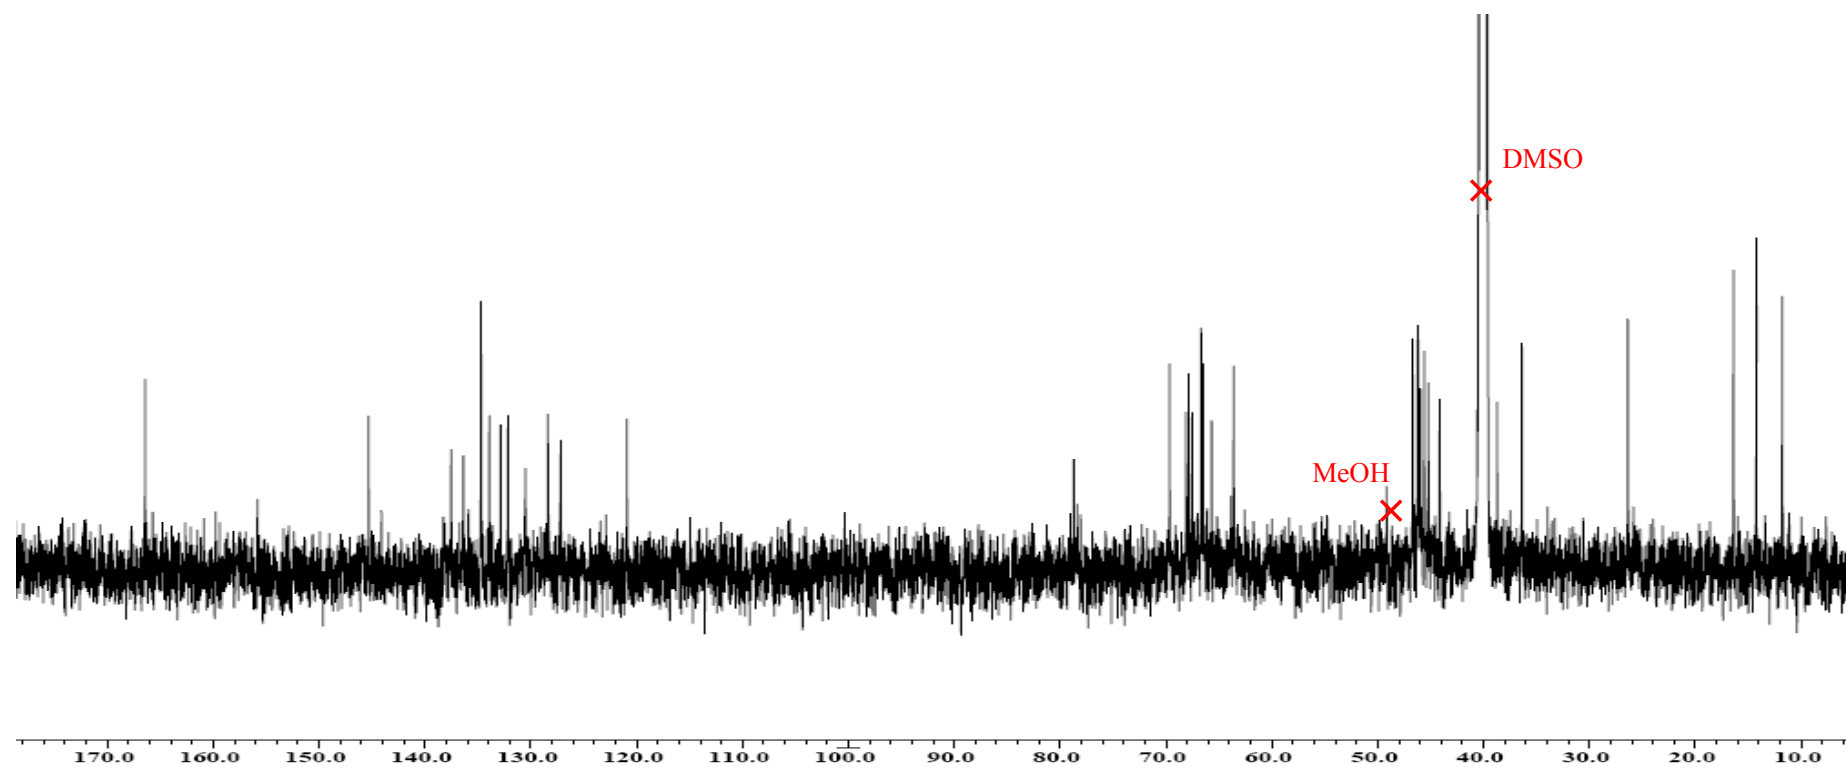



**Figure S12.** DEPT Spectrum (150 MHz) of reedsmycin B (2) in DMSO-d<sub>6</sub>

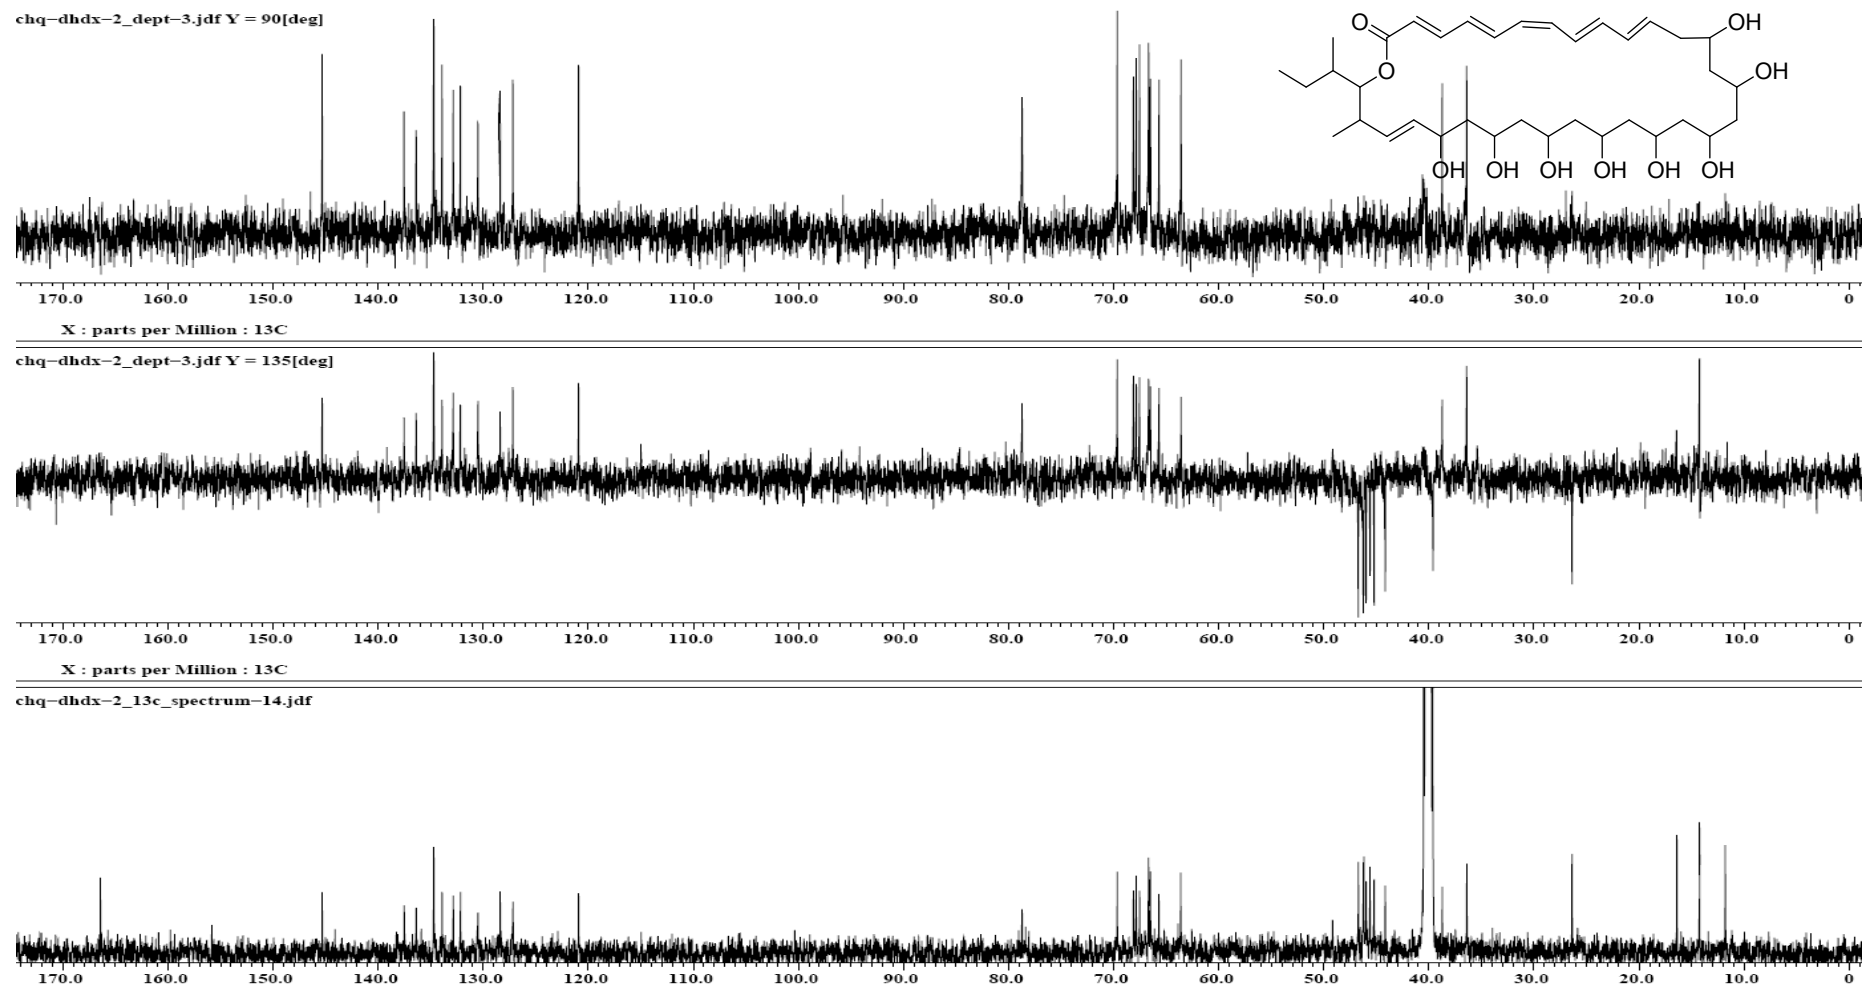







Figure S16. HRESIMS Spectrum of reedsmycin B (2)

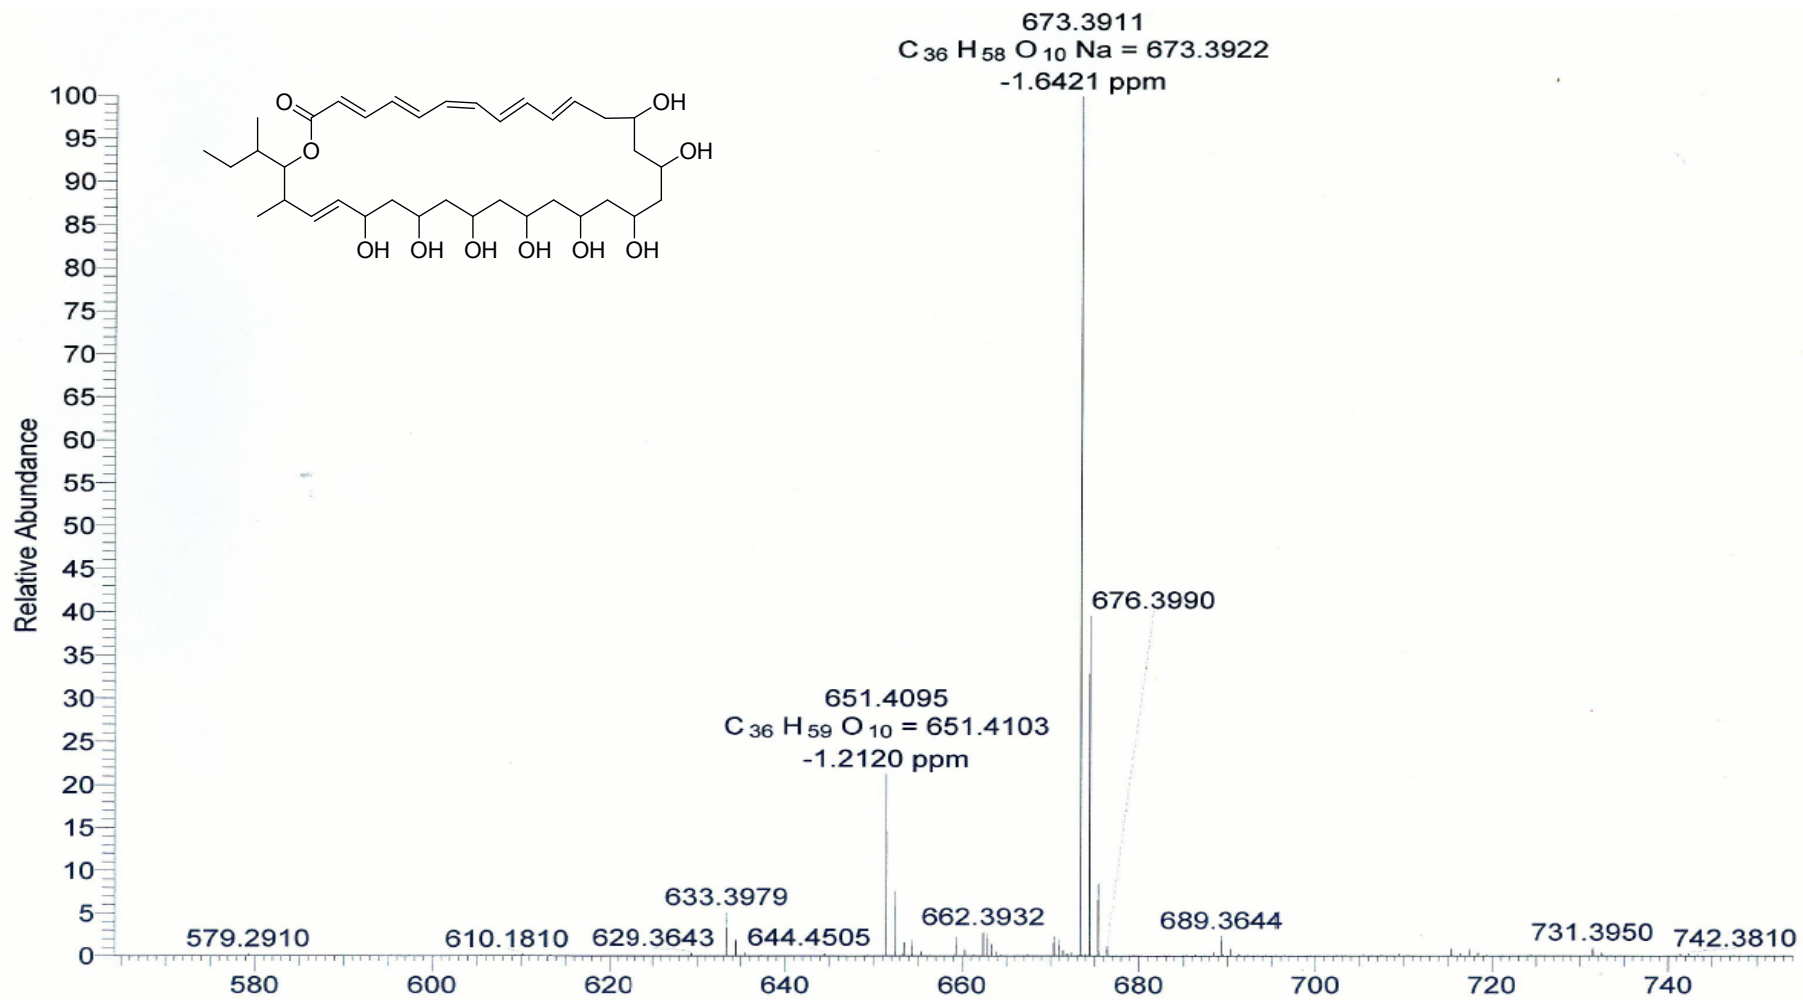

**Figure S17.** IR Spectrum of reedsmycin B (2)

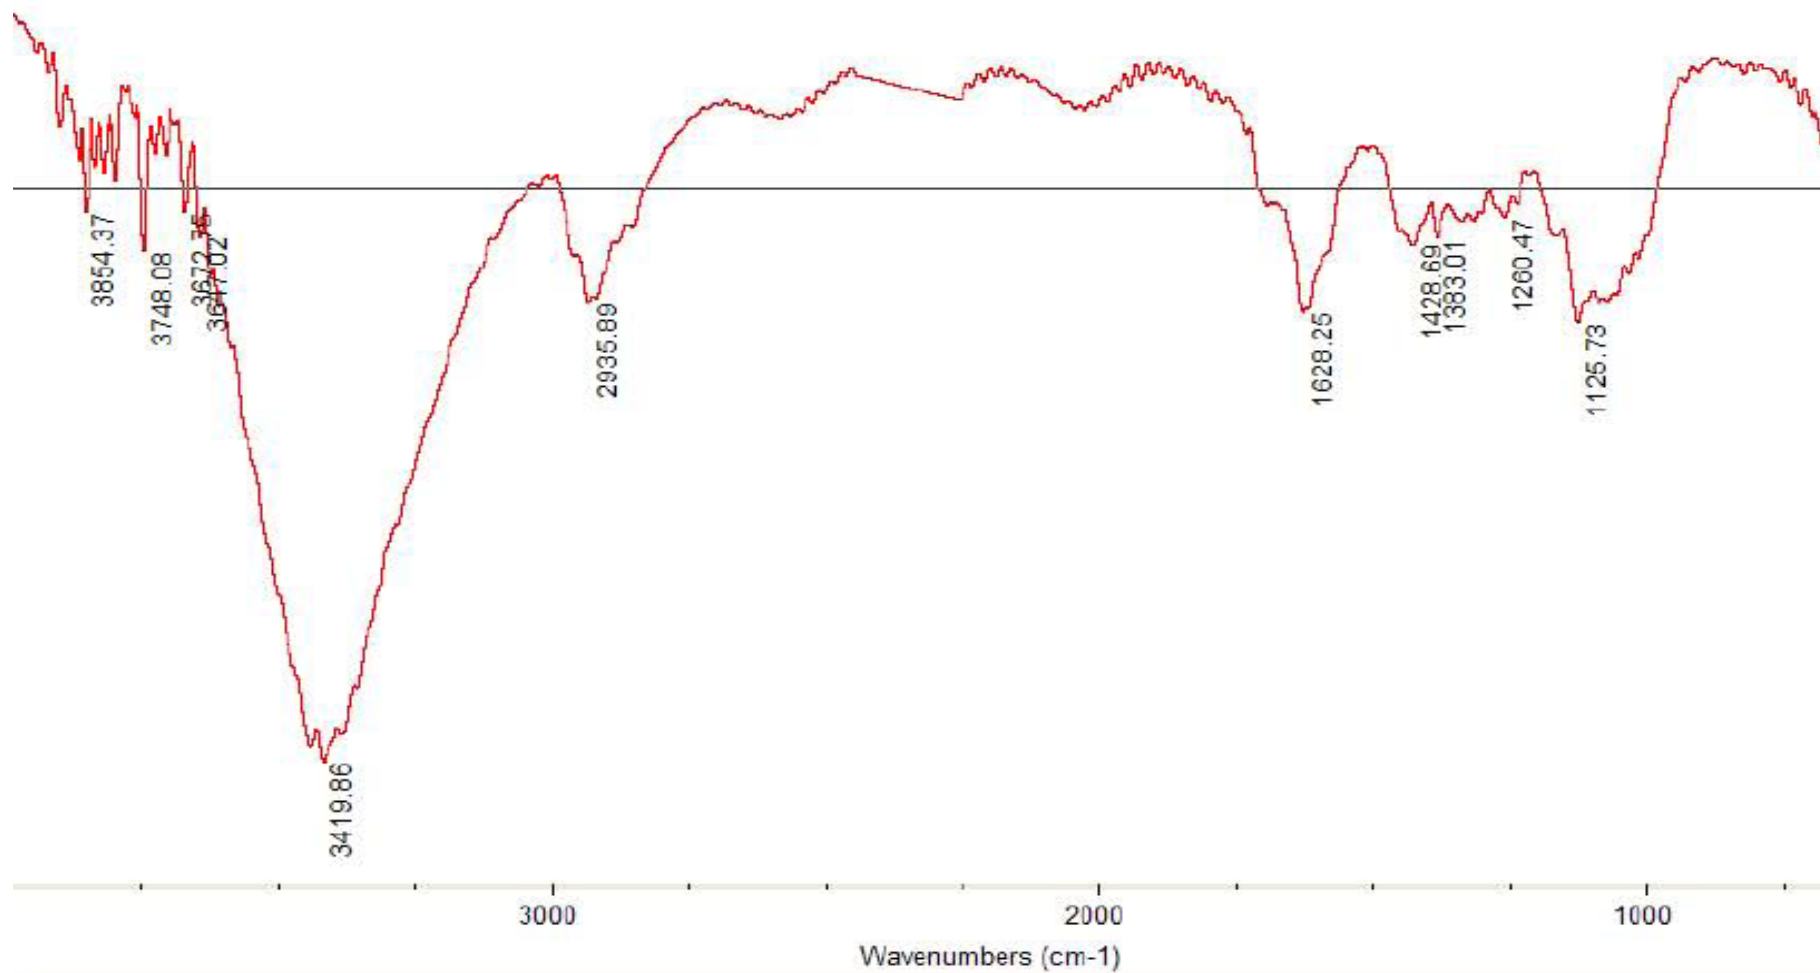

**Figure S18.**  $^1\text{H}$  NMR Spectrum (600 MHz) of reedsmycin C (**3**) in  $\text{DMSO-d}_6$

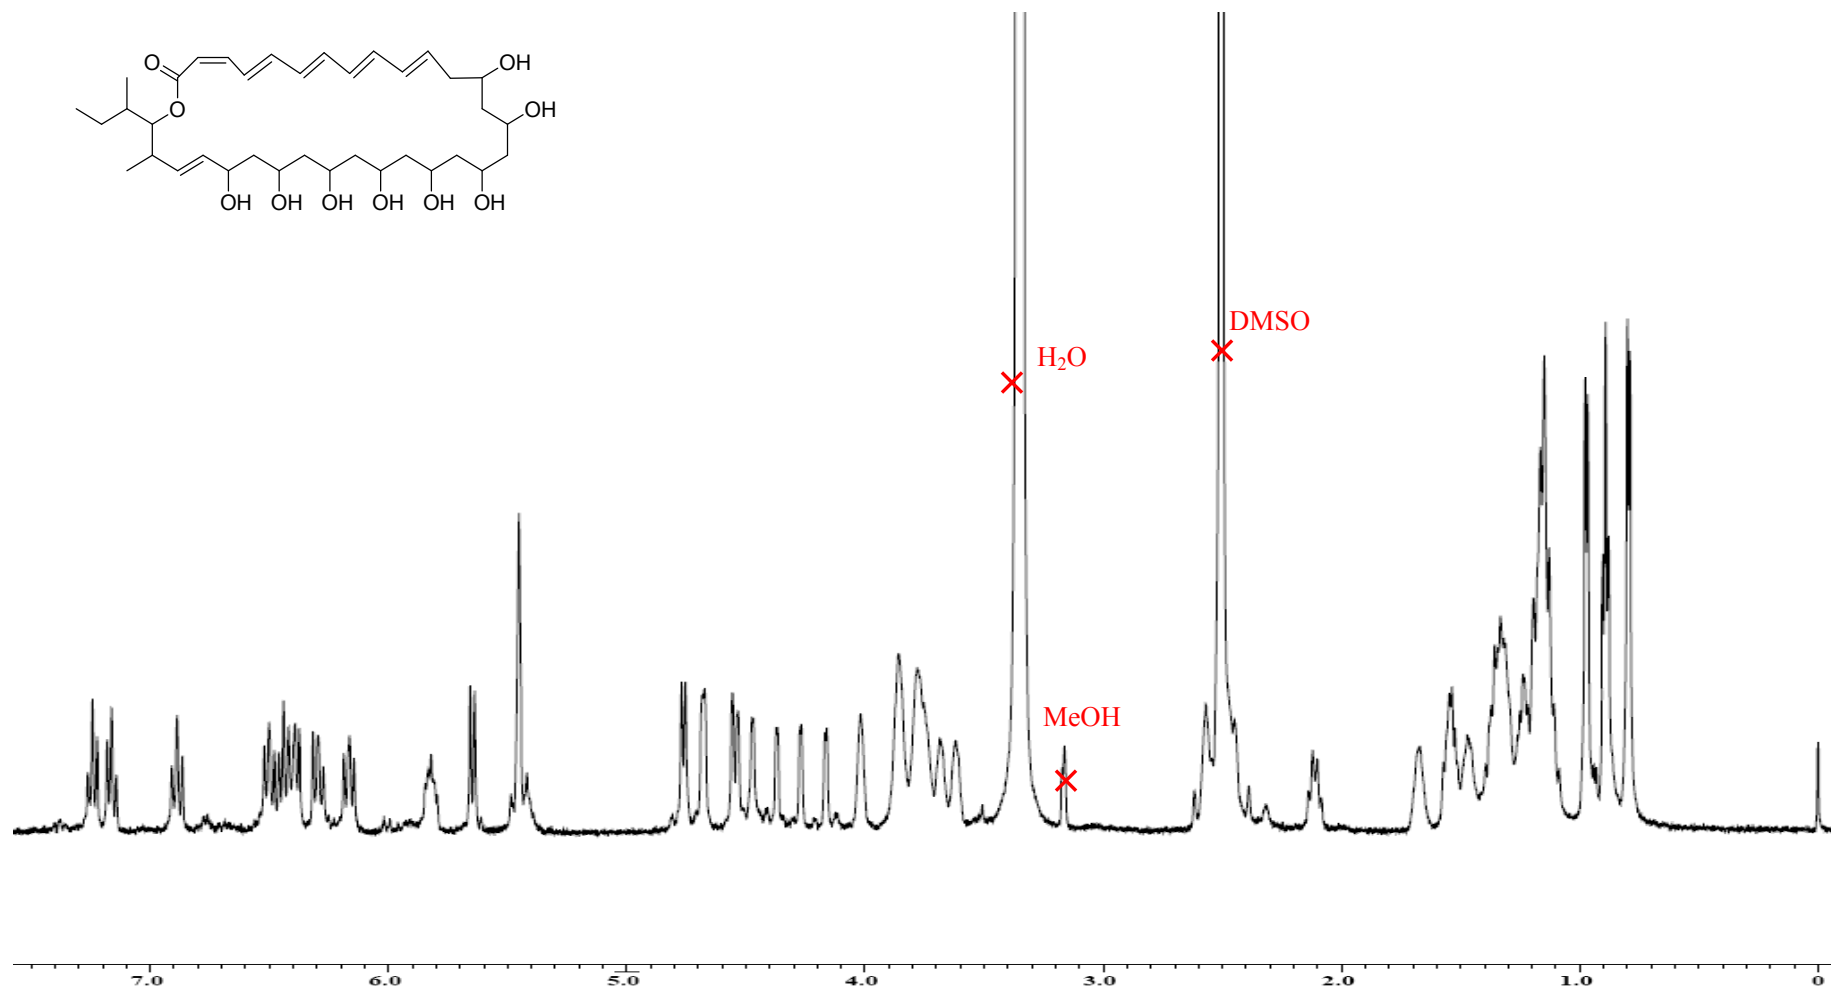

**Figure S19.**  $^{13}\text{C}$  NMR Spectrum (150 MHz) of reedsmycin C (**3**) in  $\text{DMSO-d}_6$

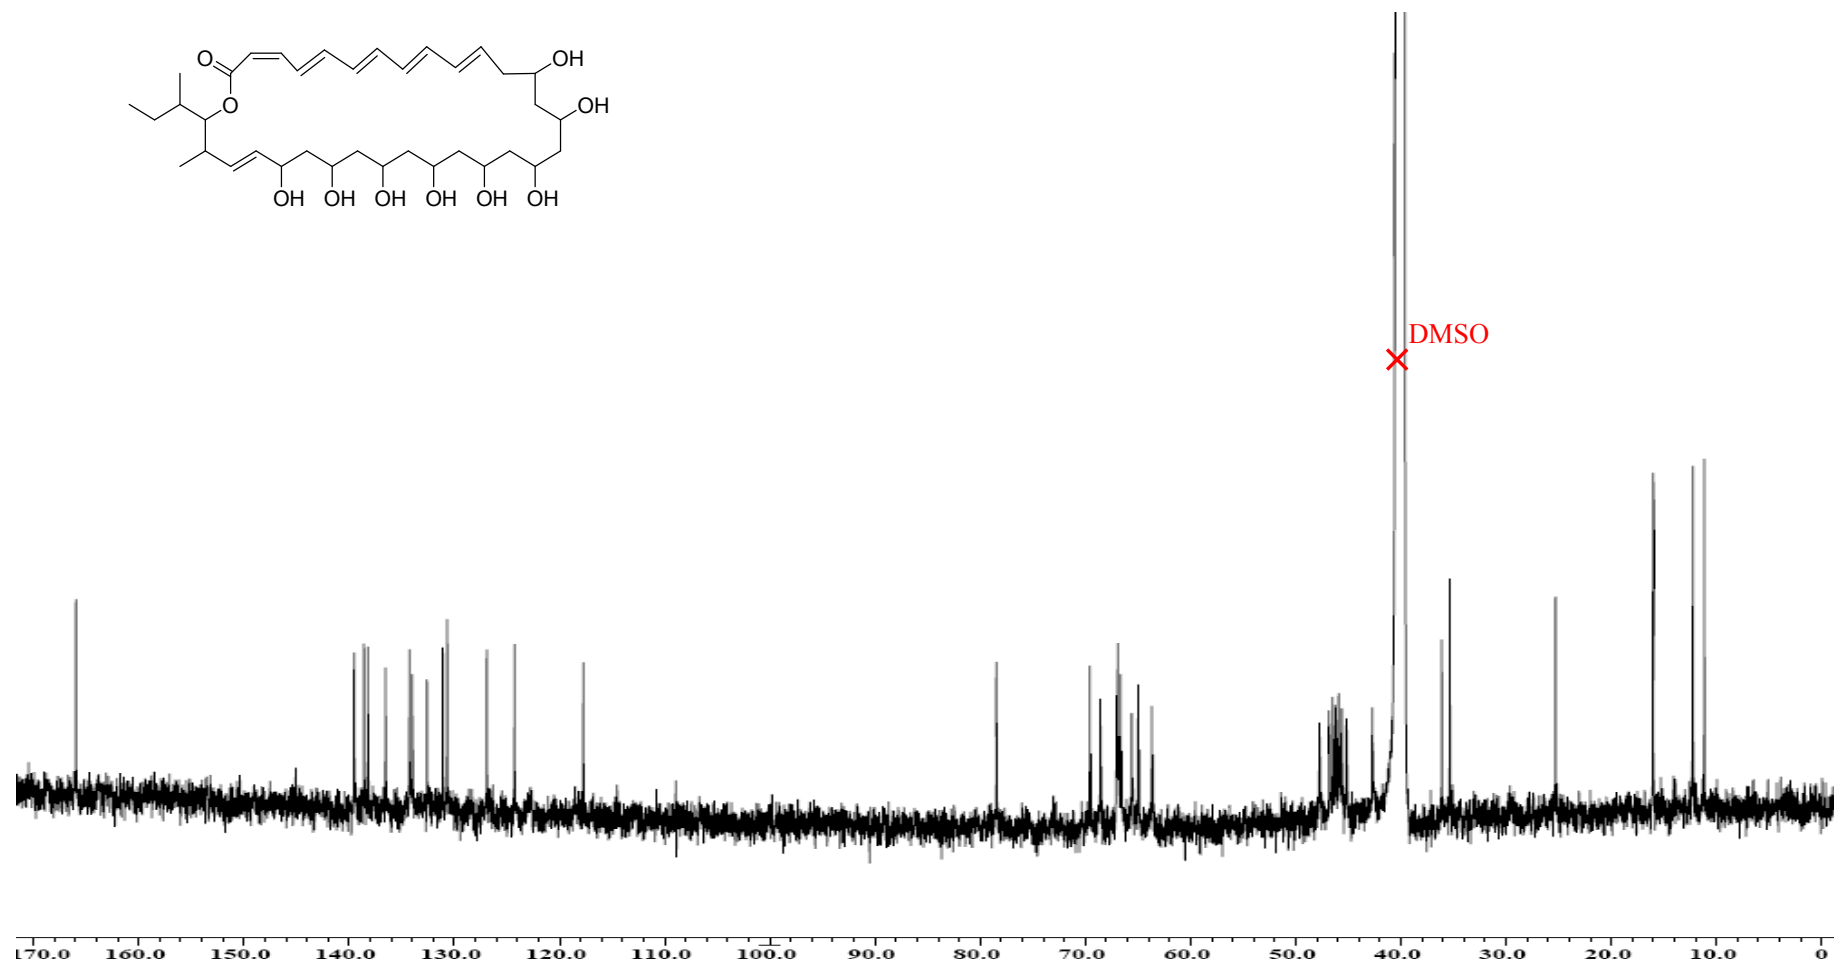



**Figure S20.** DEPT Spectrum (150 MHz) of reedsmycin C (**3**) in DMSO-d<sub>6</sub>

chq64-dhdx-3\_dept-2.jdf Y = 90[deg]

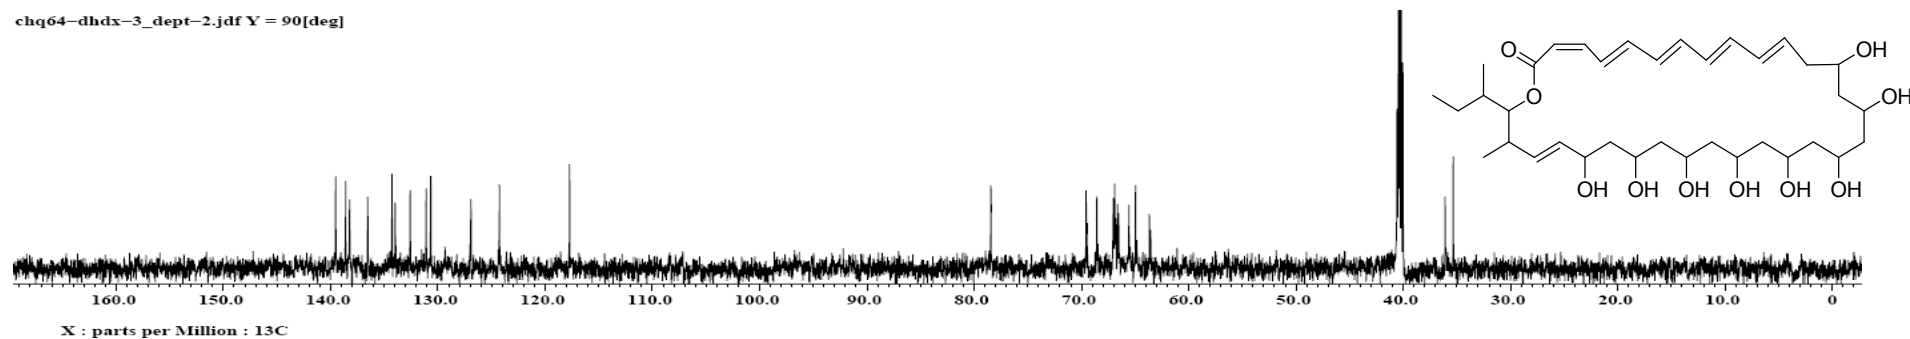

X : parts per Million : 13C

chq64-dhdx-3\_dept-2.jdf Y = 135[deg]

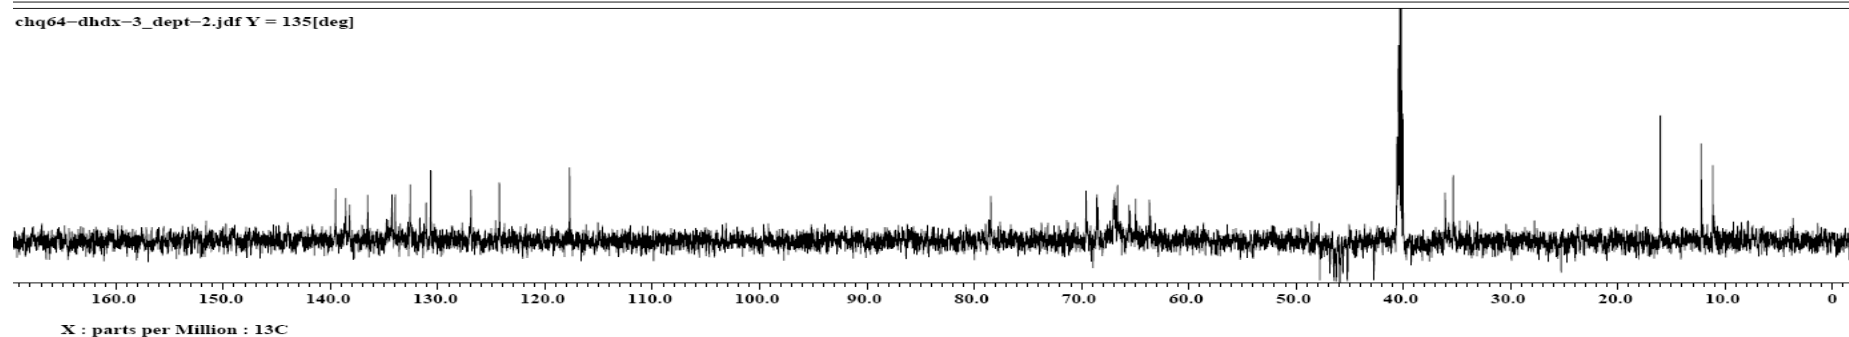

X : parts per Million : 13C

chq64-dhdx-3\_13c\_spectrum-14.jdf

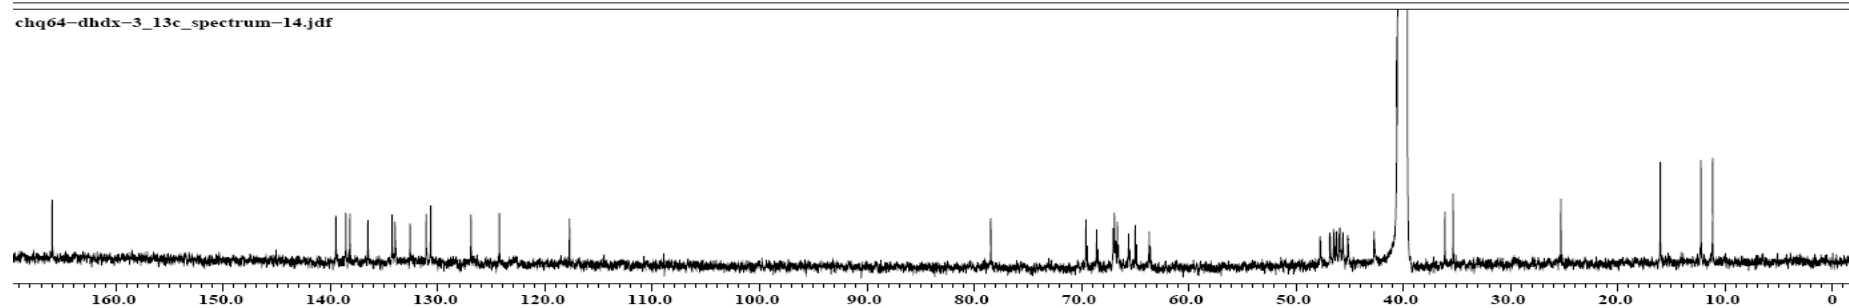

Figure S21. HMQC Spectrum of reedsmycin C (3) in DMSO-d<sub>6</sub>

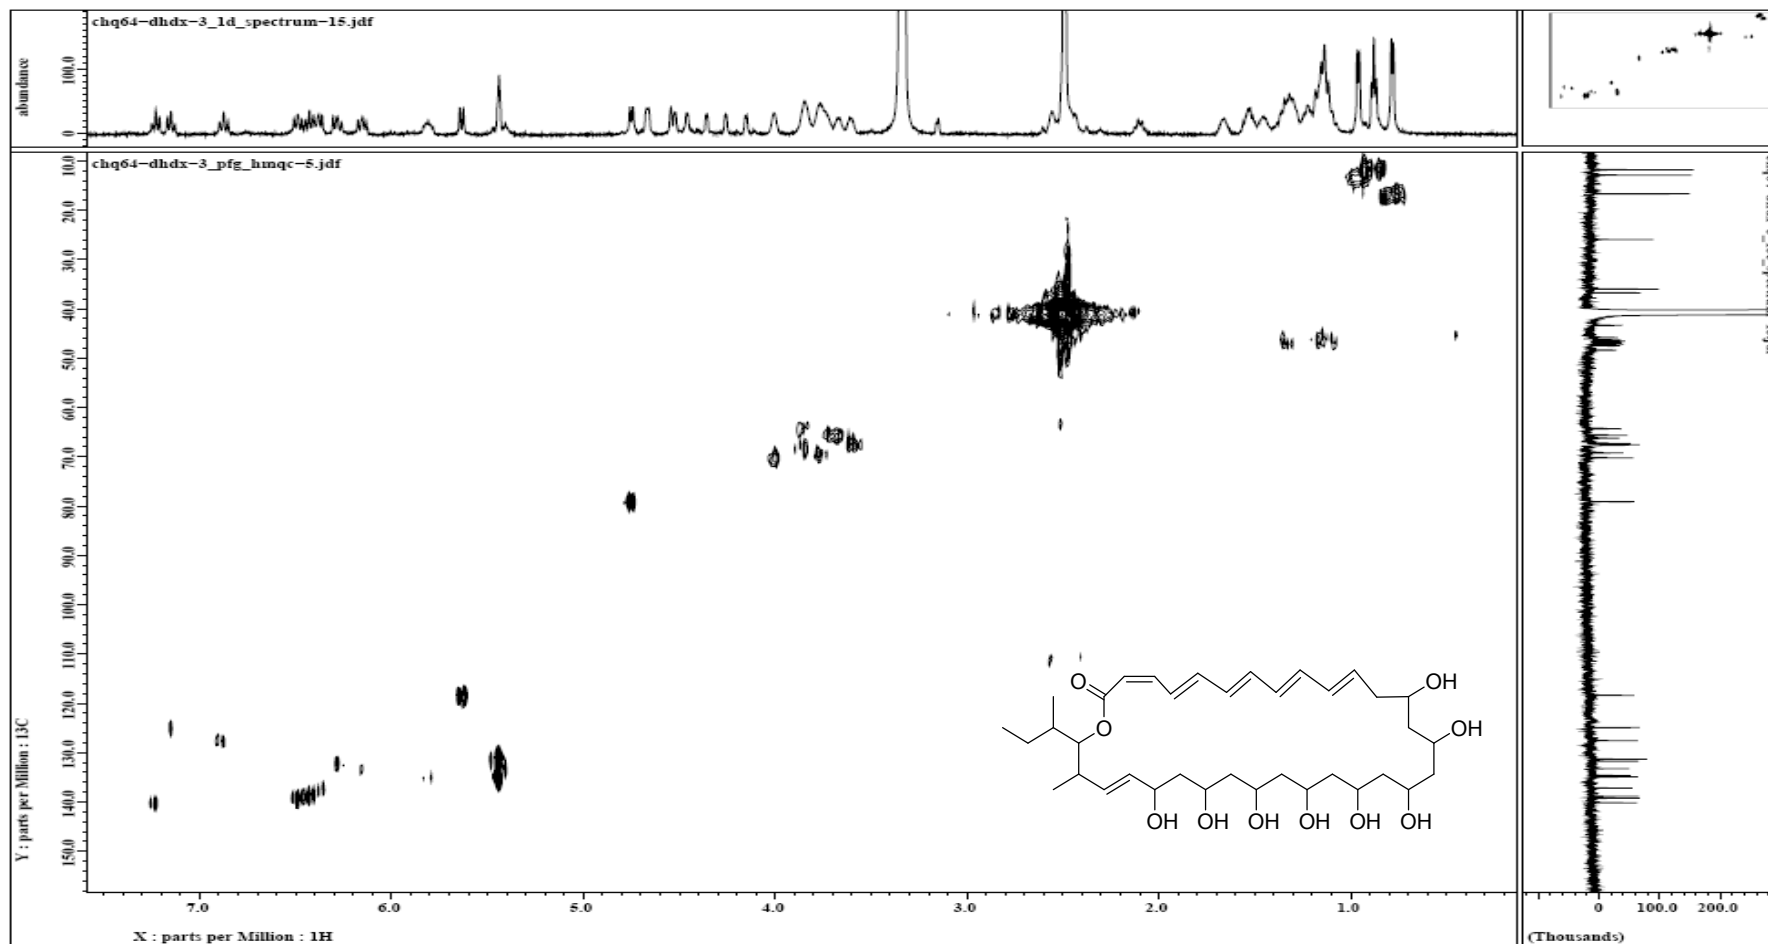

Figure S22.  $^1\text{H}$ - $^1\text{H}$  COSY Spectrum of reedsmycin C (3) in  $\text{DMSO-d}_6$

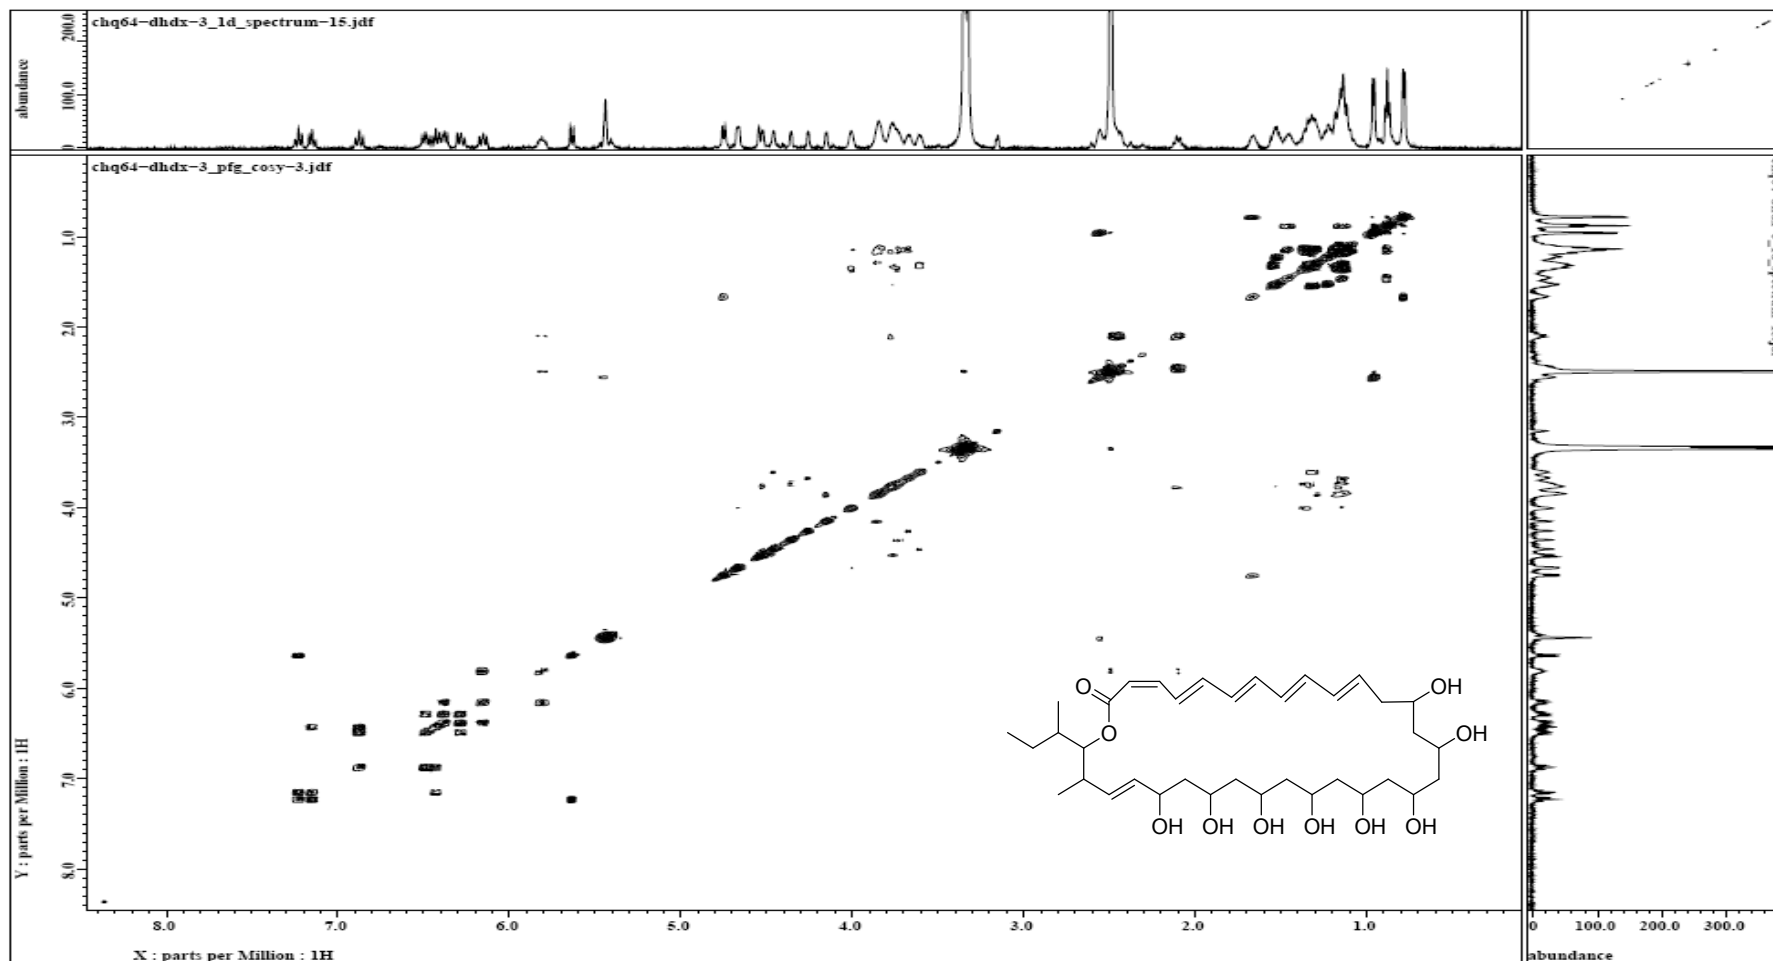

Figure S23. HMBC Spectrum of reedsmycin C (3) in DMSO-d<sub>6</sub>

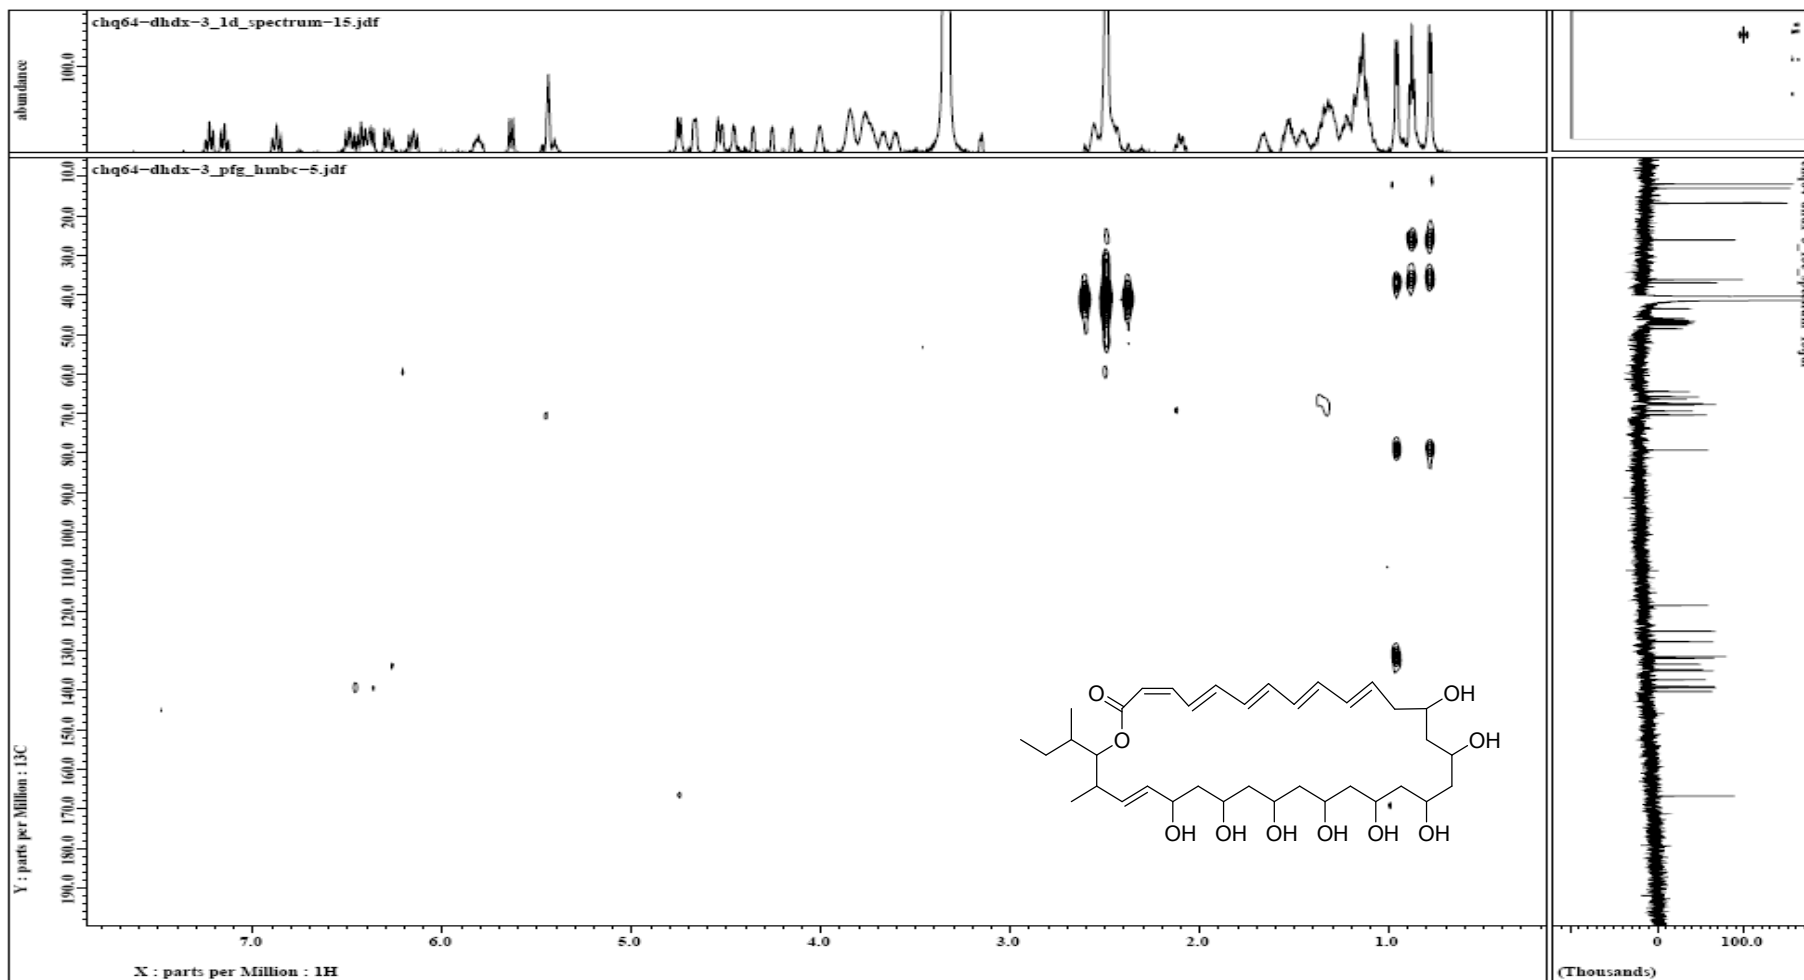

Figure S24. HRESIMS Spectrum of reedsmycin C (3)

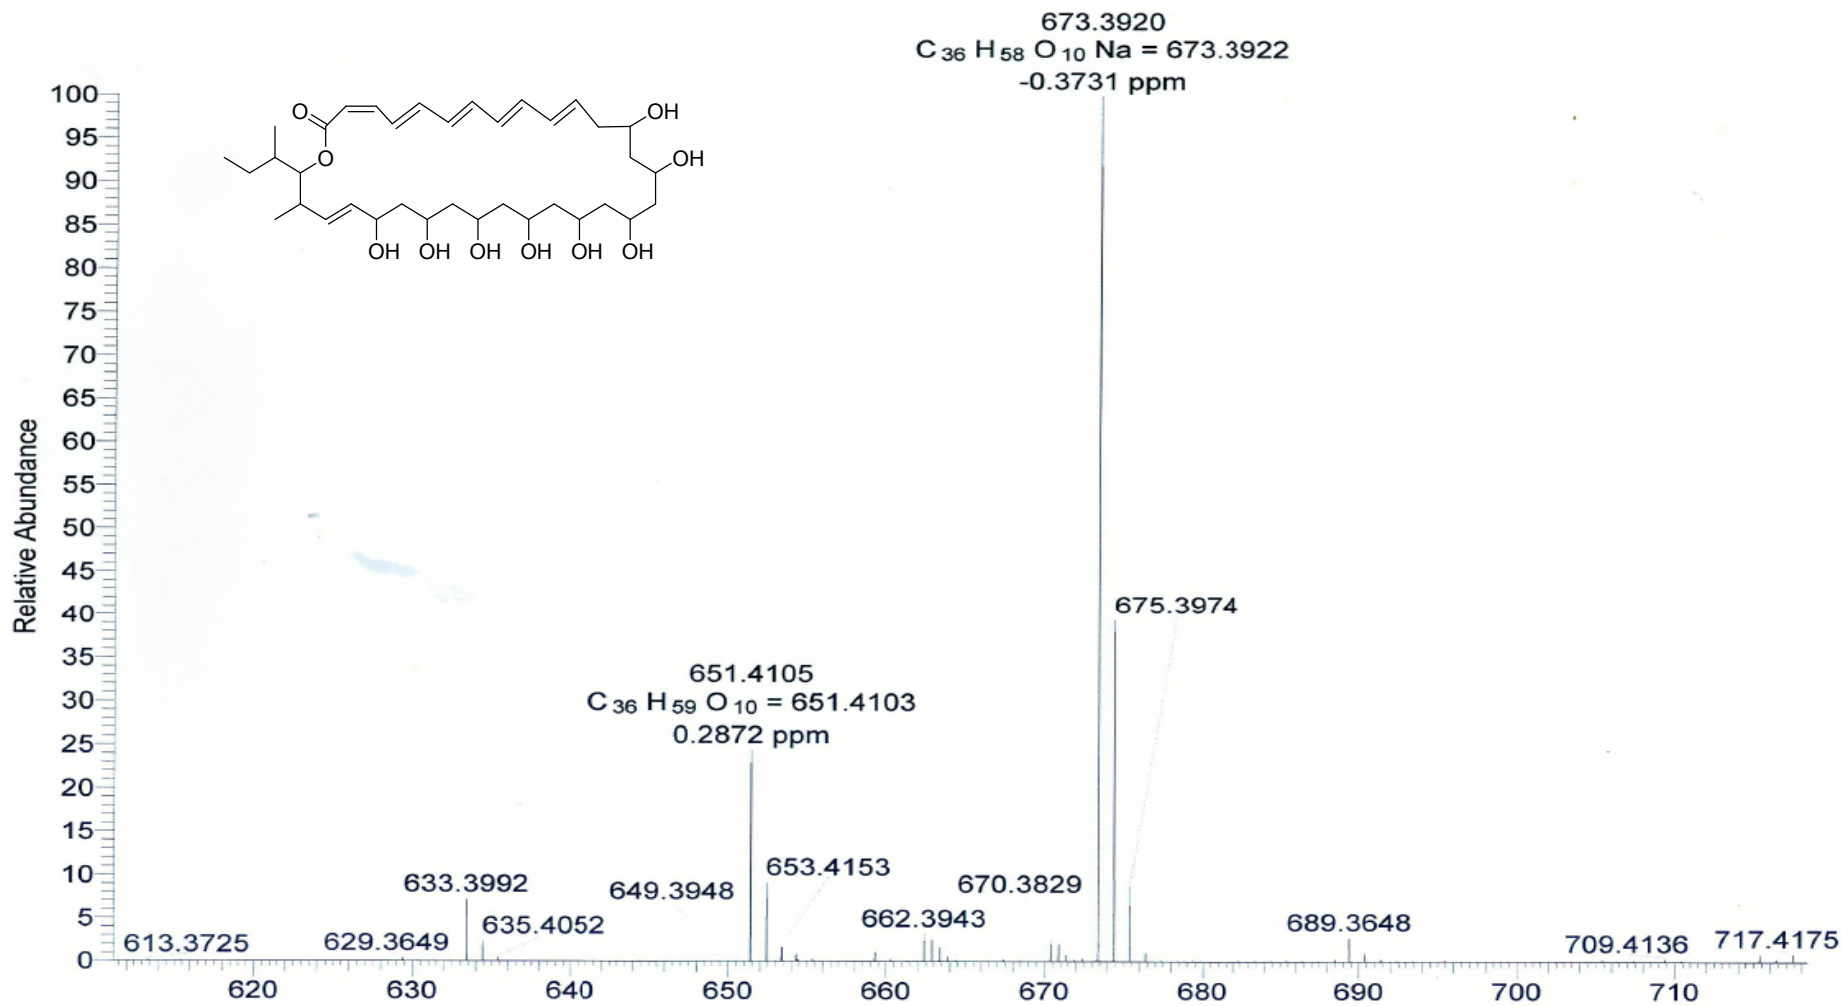

**Figure S25.** IR Spectrum of reedsmycin C (3)

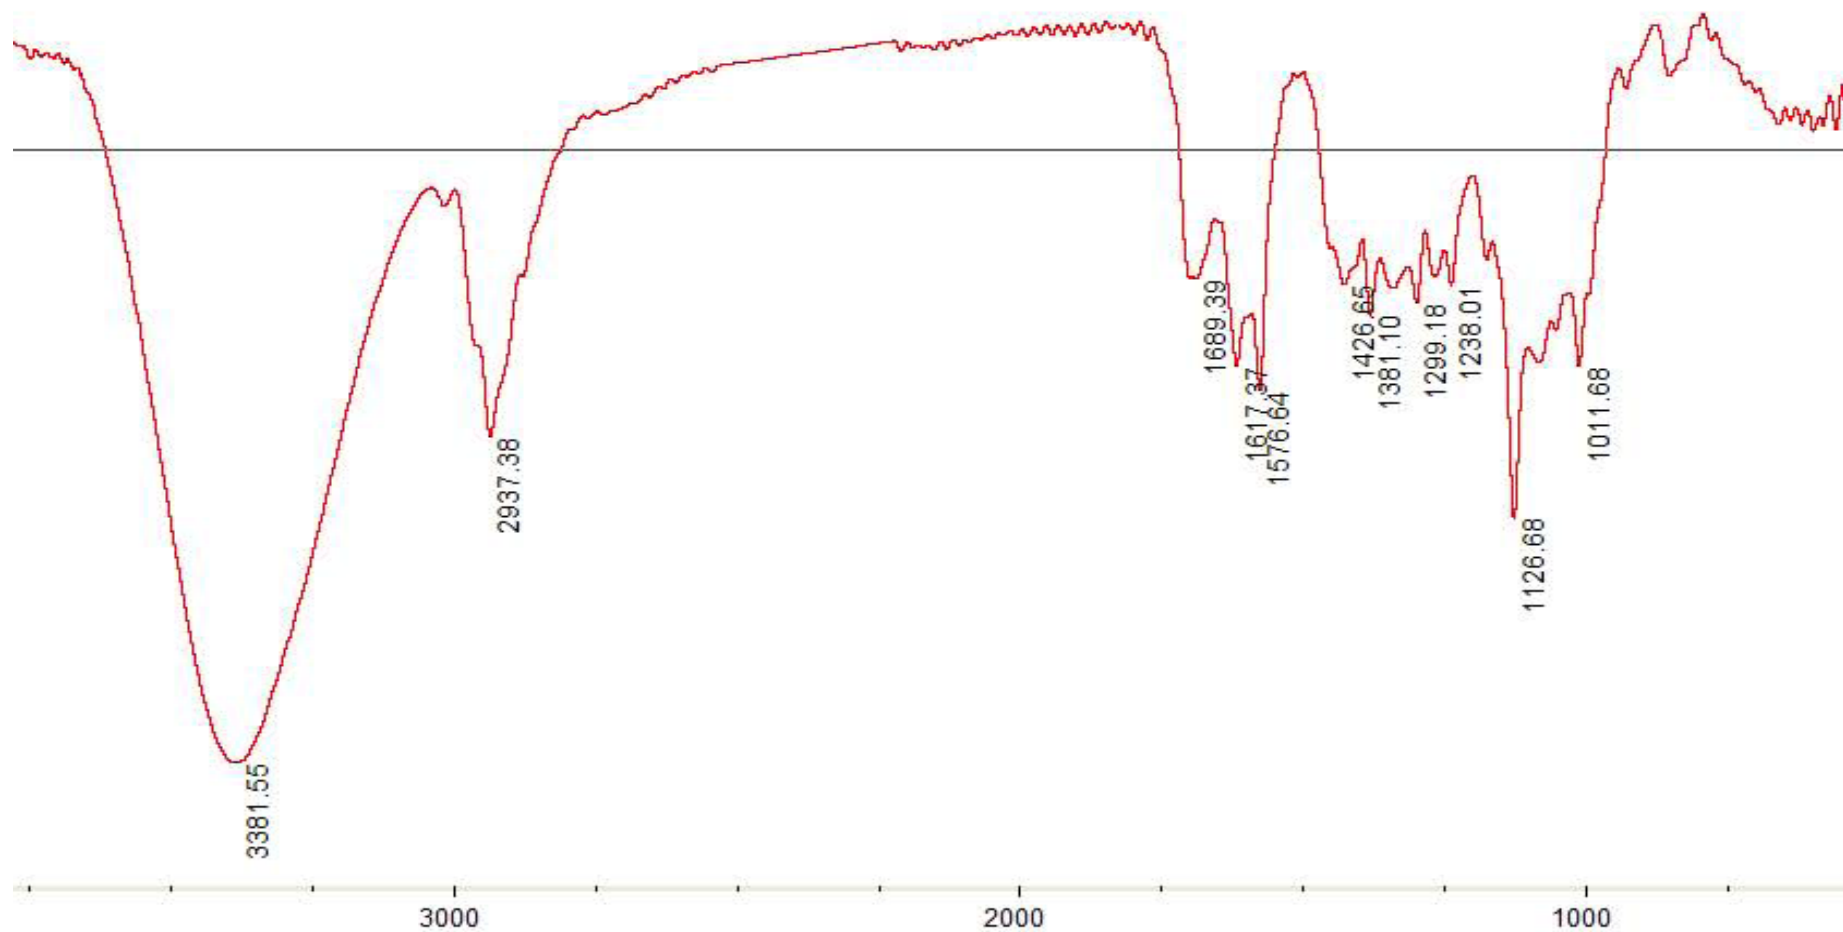

**Figure S26.**  $^1\text{H}$  NMR Spectrum (600 MHz) of reedsmycin D (**4**) in  $\text{DMSO-d}_6$

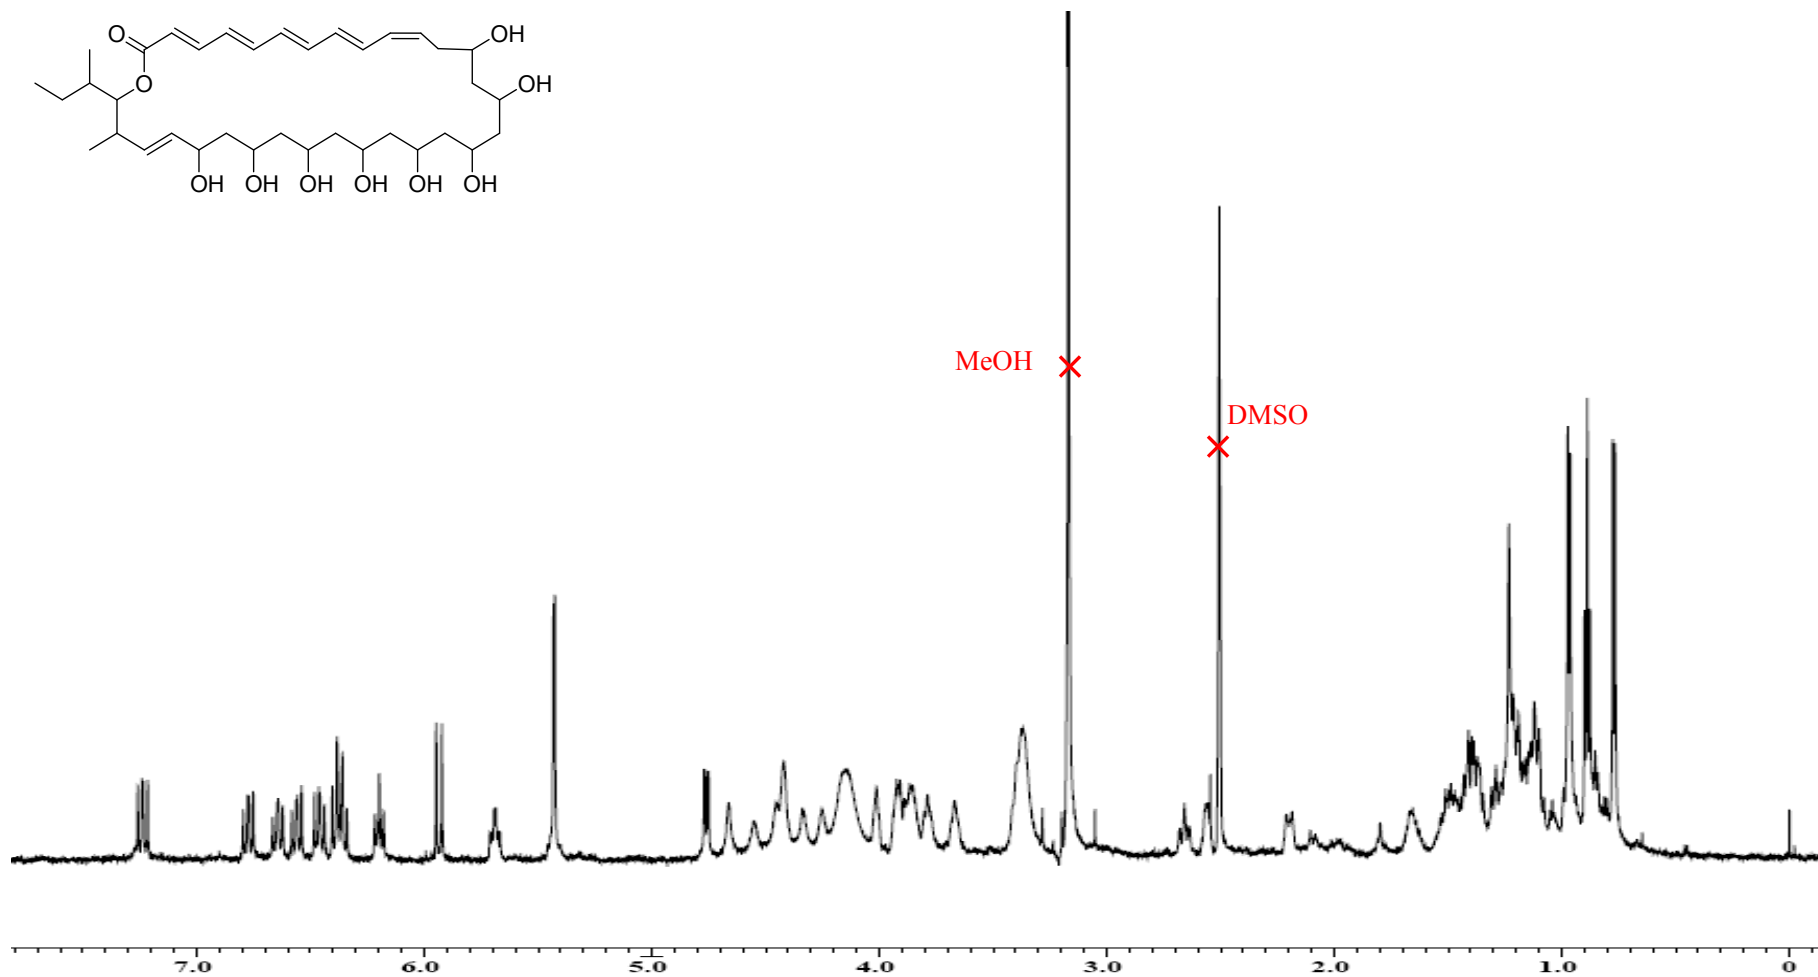

**Figure S27.**  $^{13}\text{C}$  NMR Spectrum (150 MHz) of reedsmycin D (4) in  $\text{DMSO-d}_6$

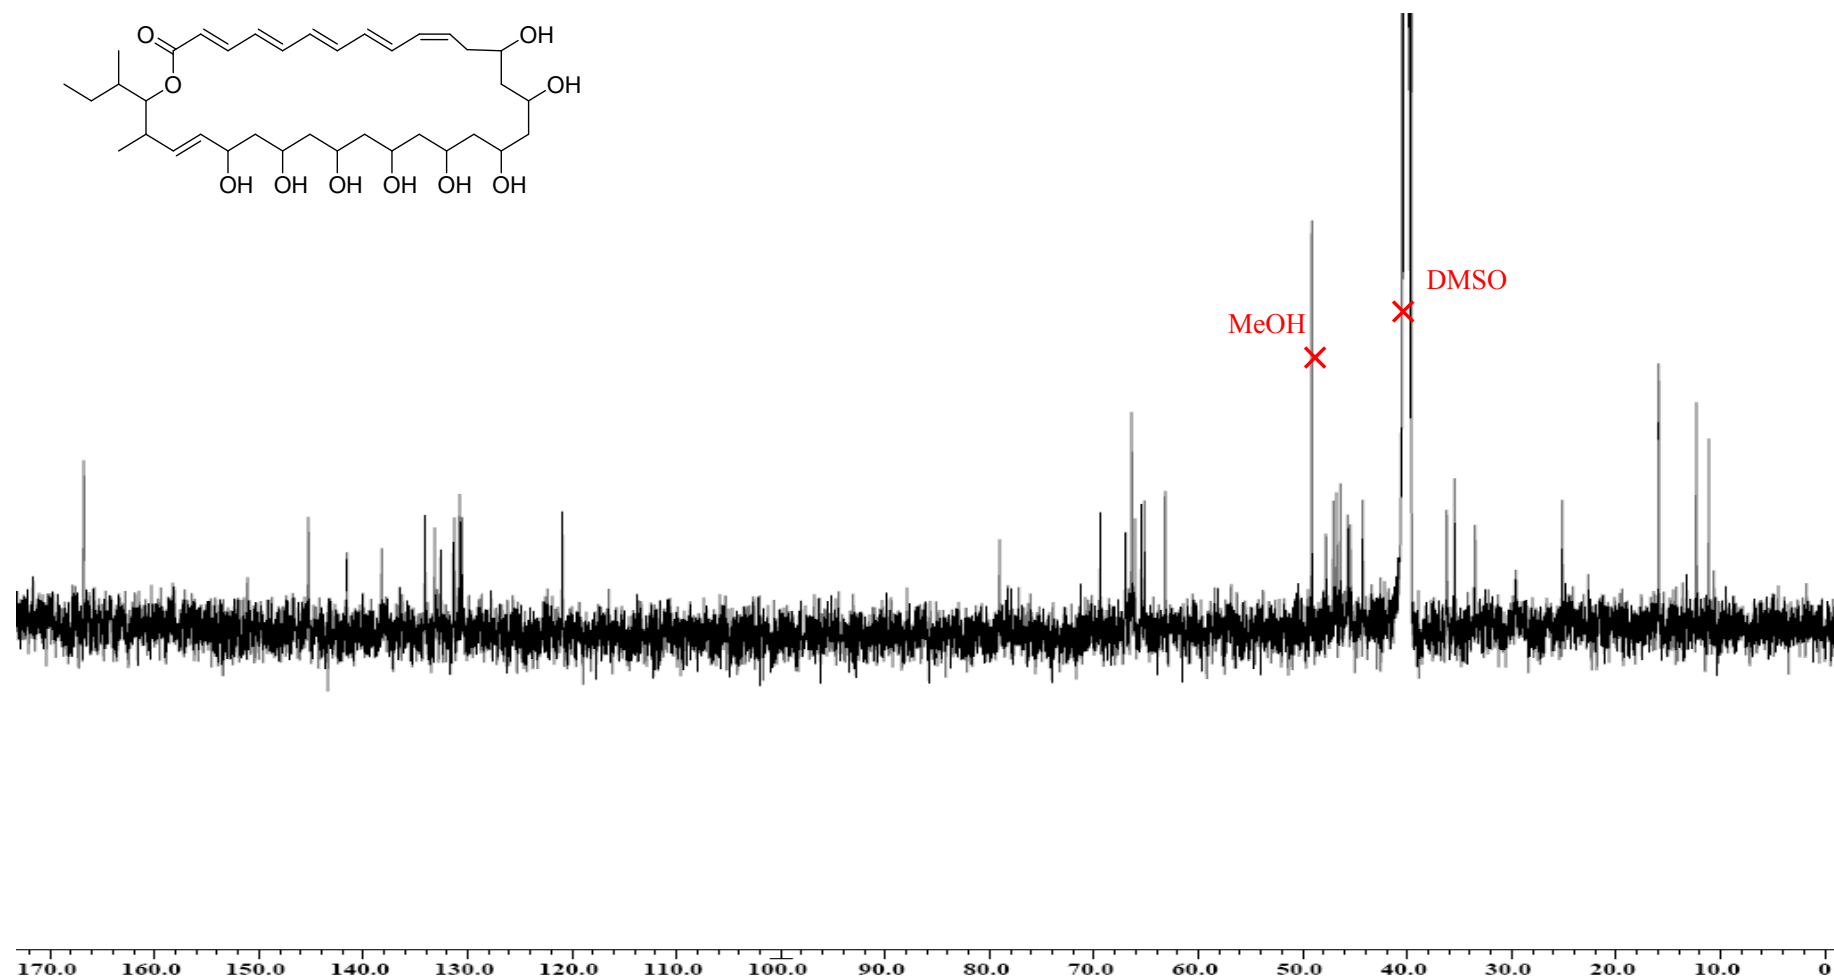







Figure S30.  $^1\text{H}$ - $^1\text{H}$  COSY Spectrum of reedsmycin D (4) in  $\text{DMSO-d}_6$

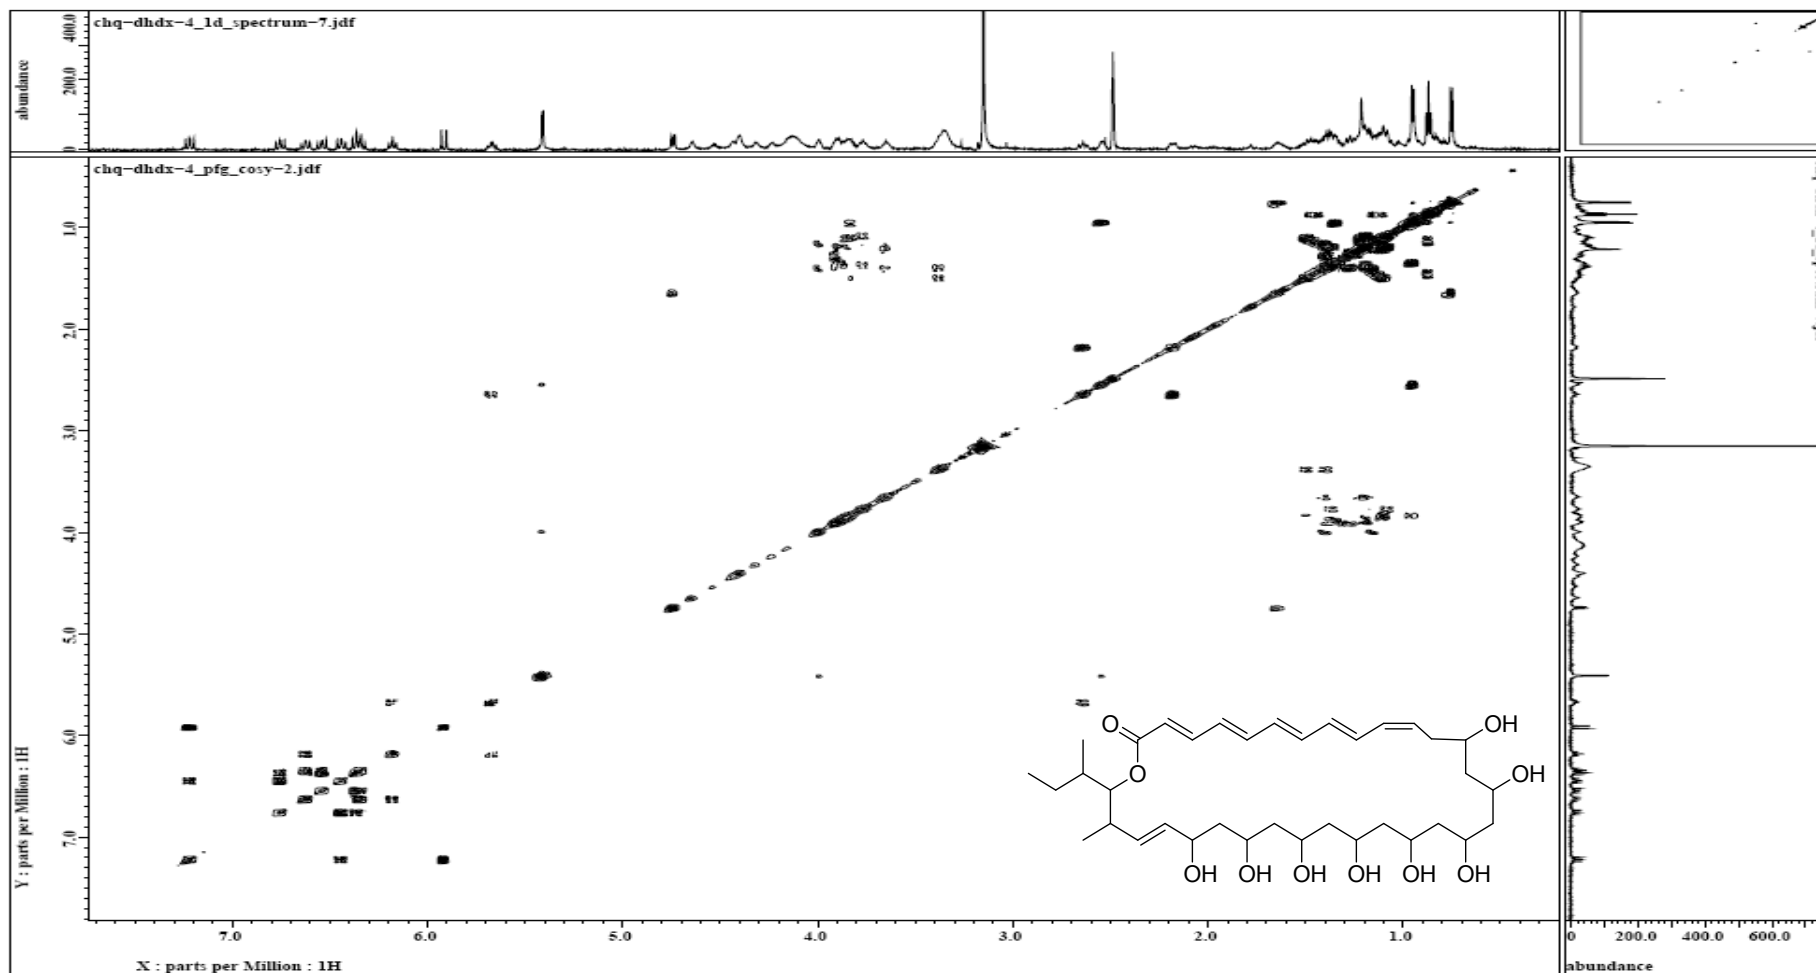

Figure S31. HMBC Spectrum of reedsmycin D (4) in DMSO-d<sub>6</sub>

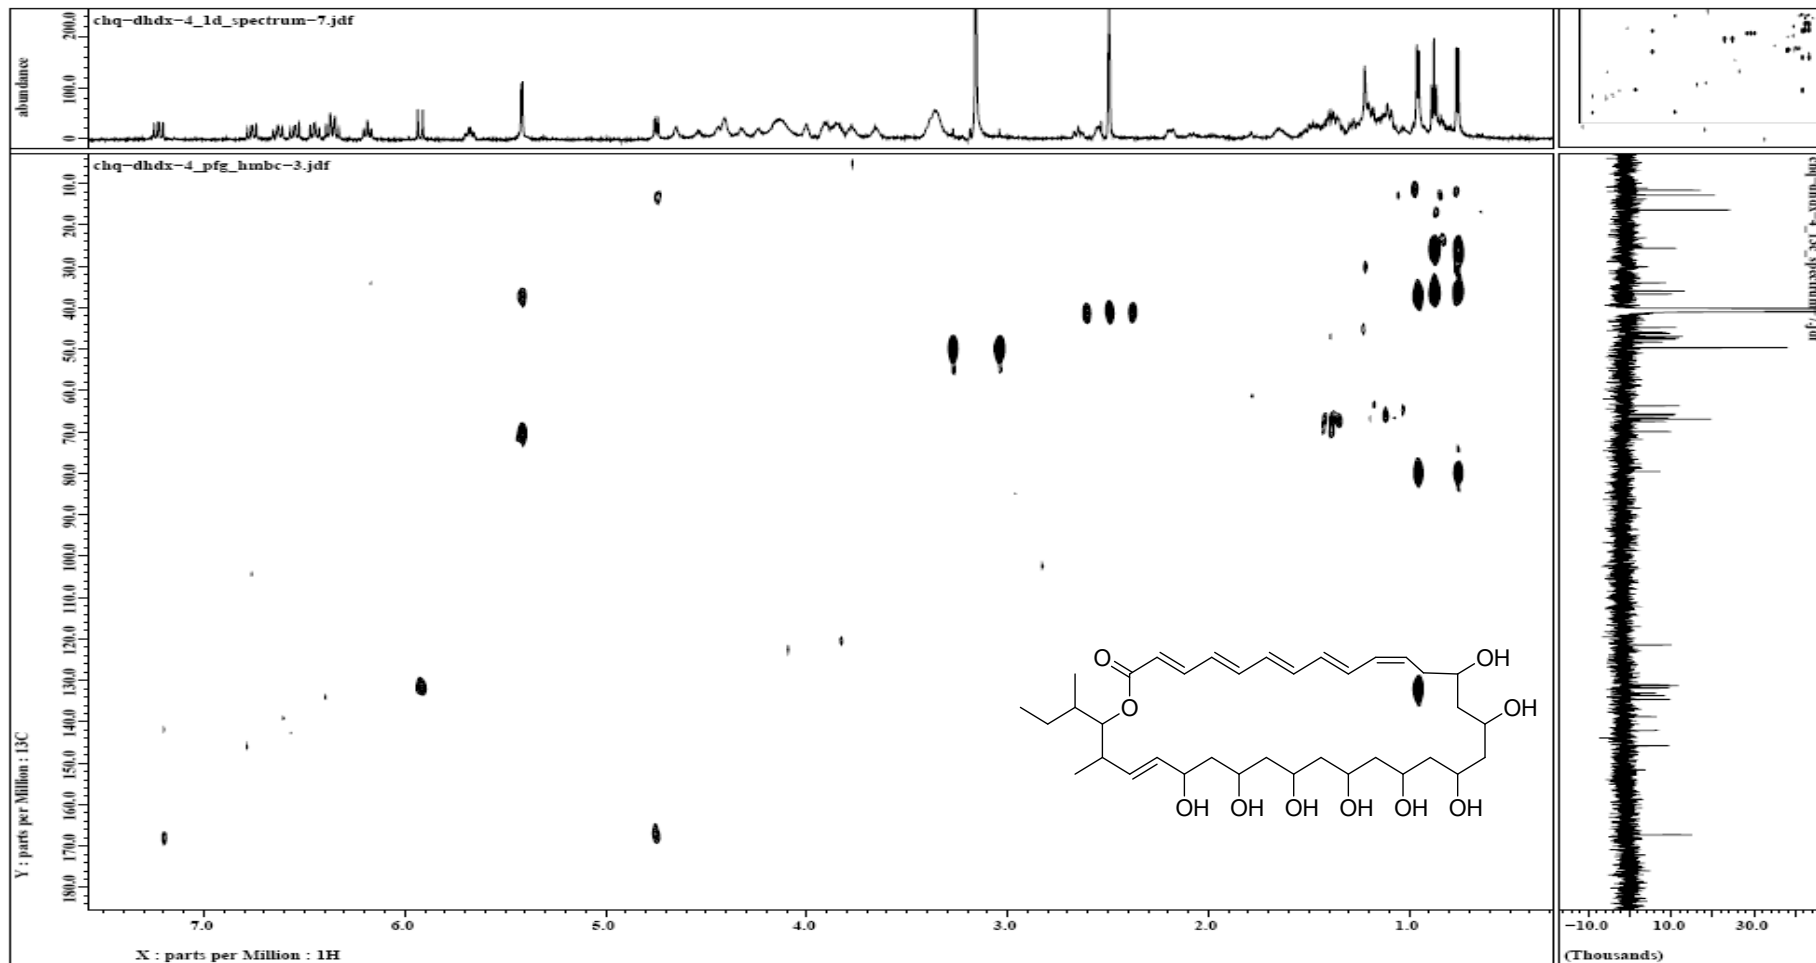

Figure S32. HRESIMS Spectrum of reedsmycin D (4)

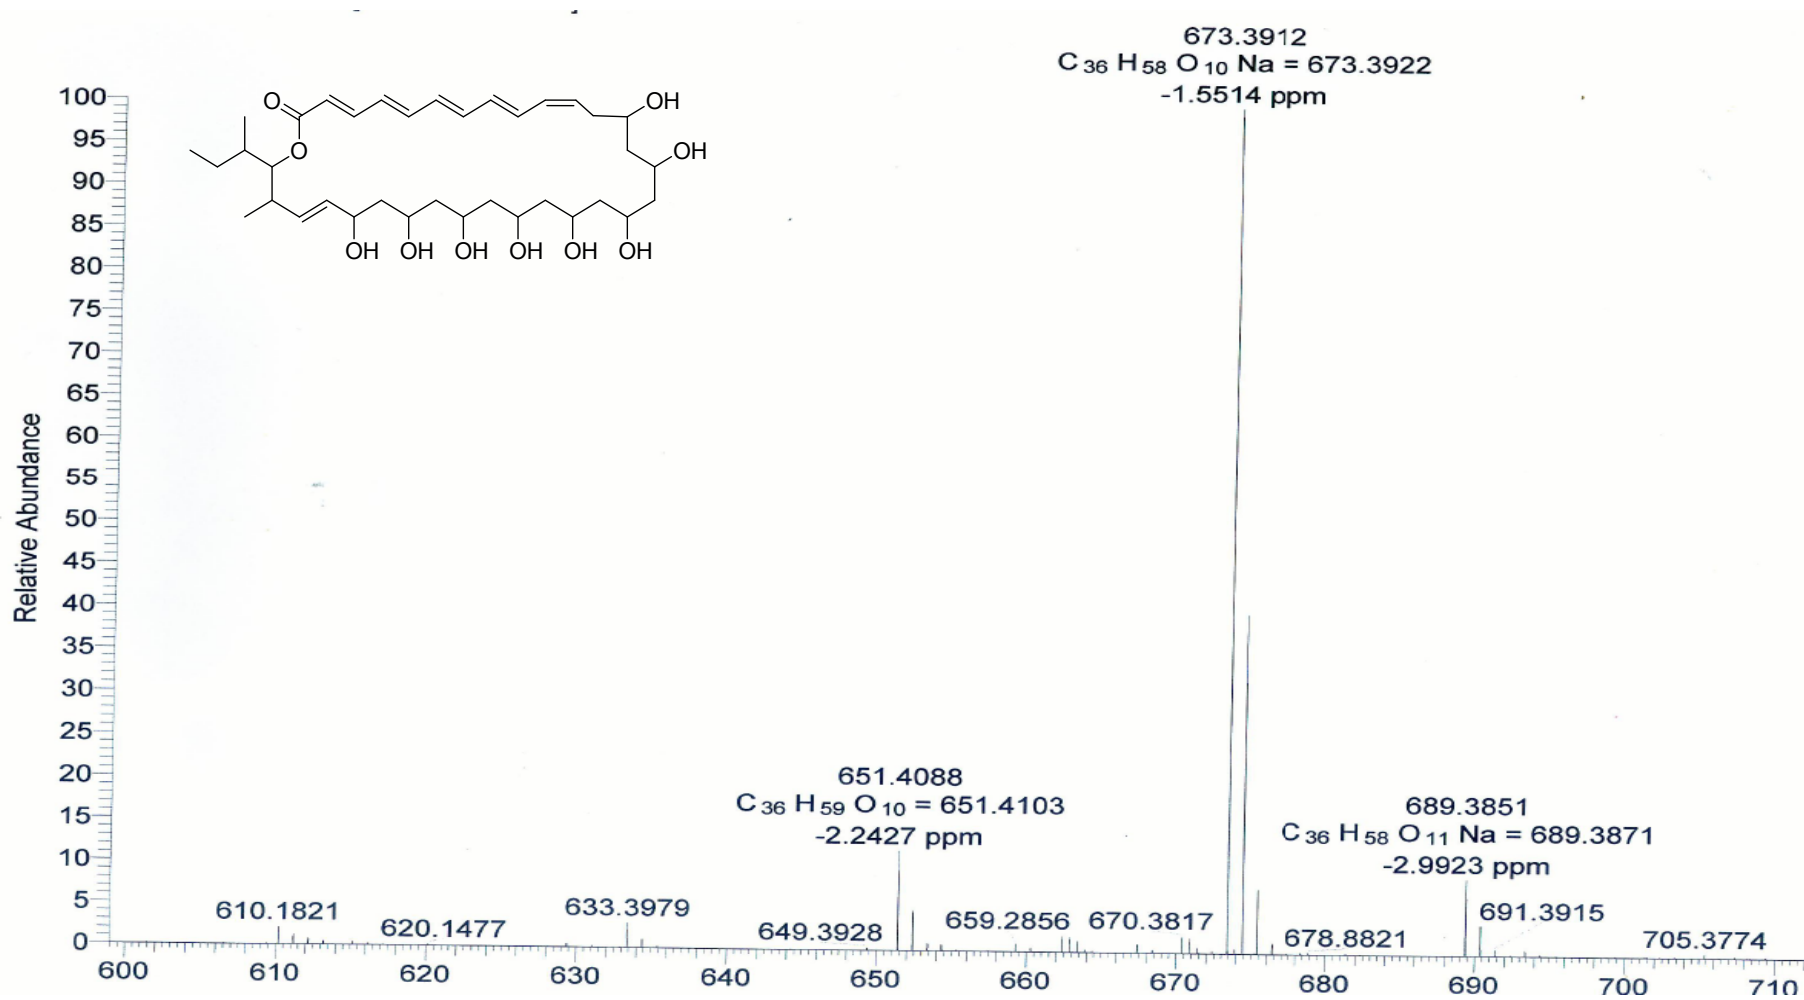

Figure S33. IR Spectrum of reedsmycin D (4)

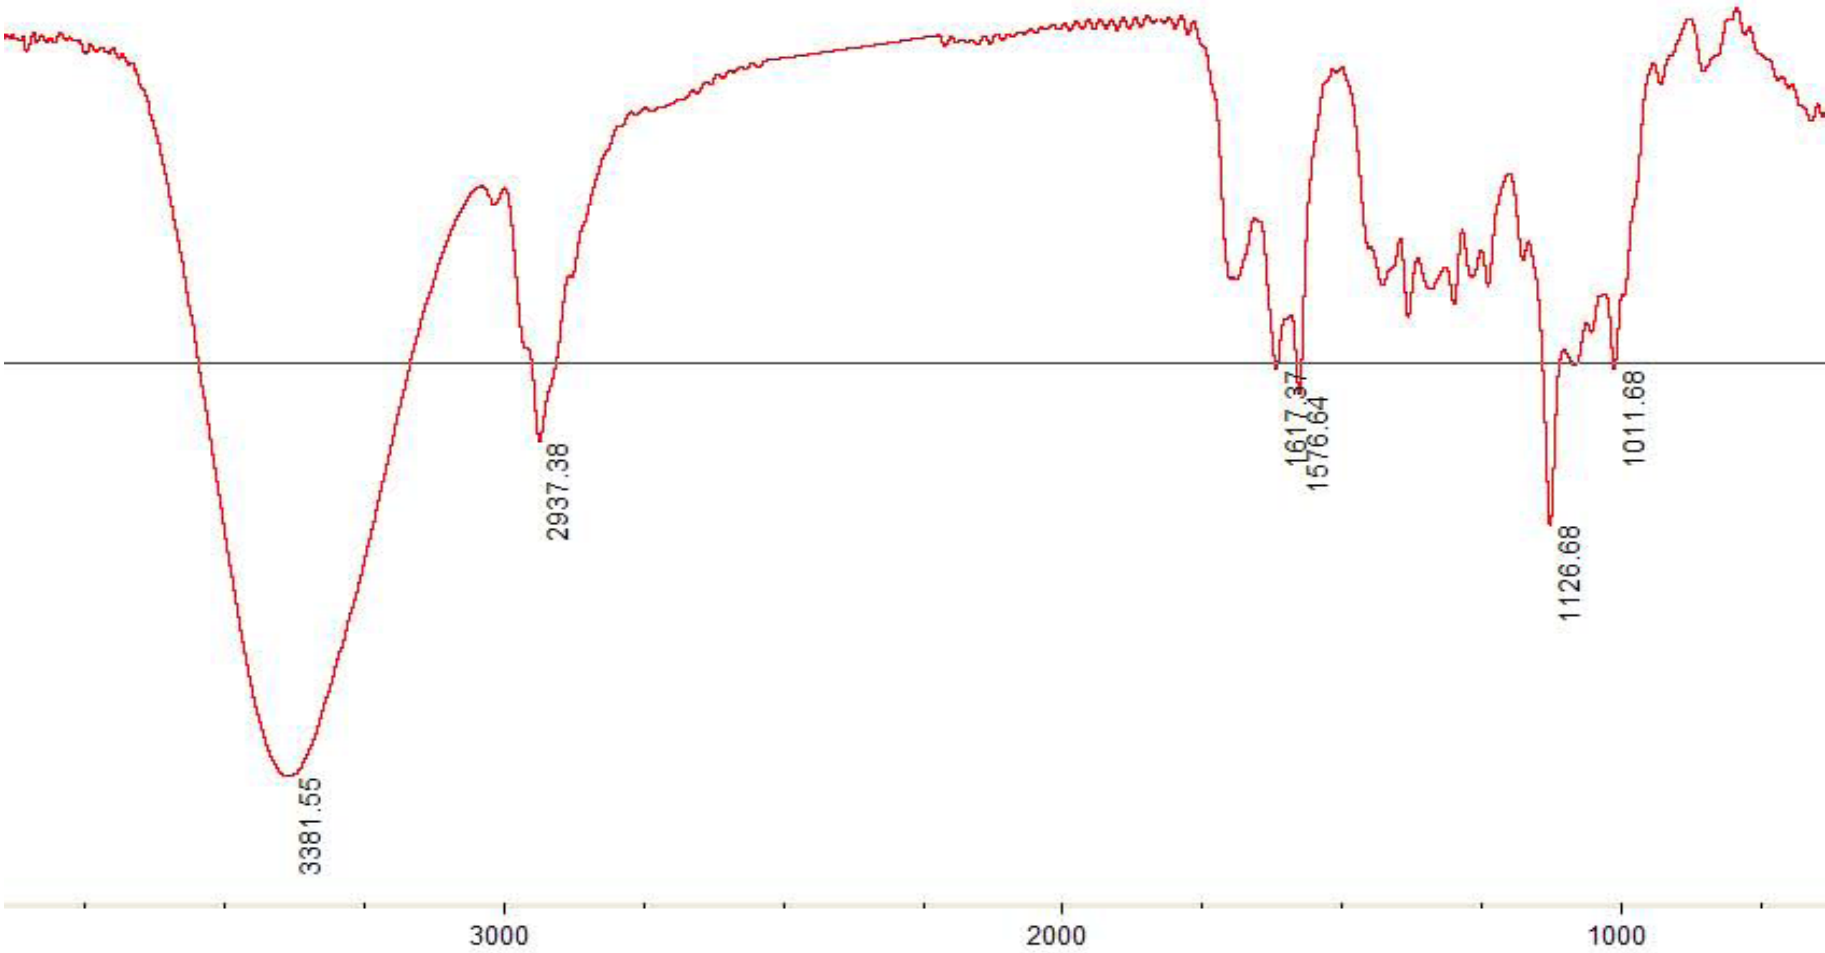

**Figure S34.**  $^1\text{H}$  NMR Spectrum (400 MHz) of reedsmycin E (**5**) in  $\text{DMSO-d}_6$

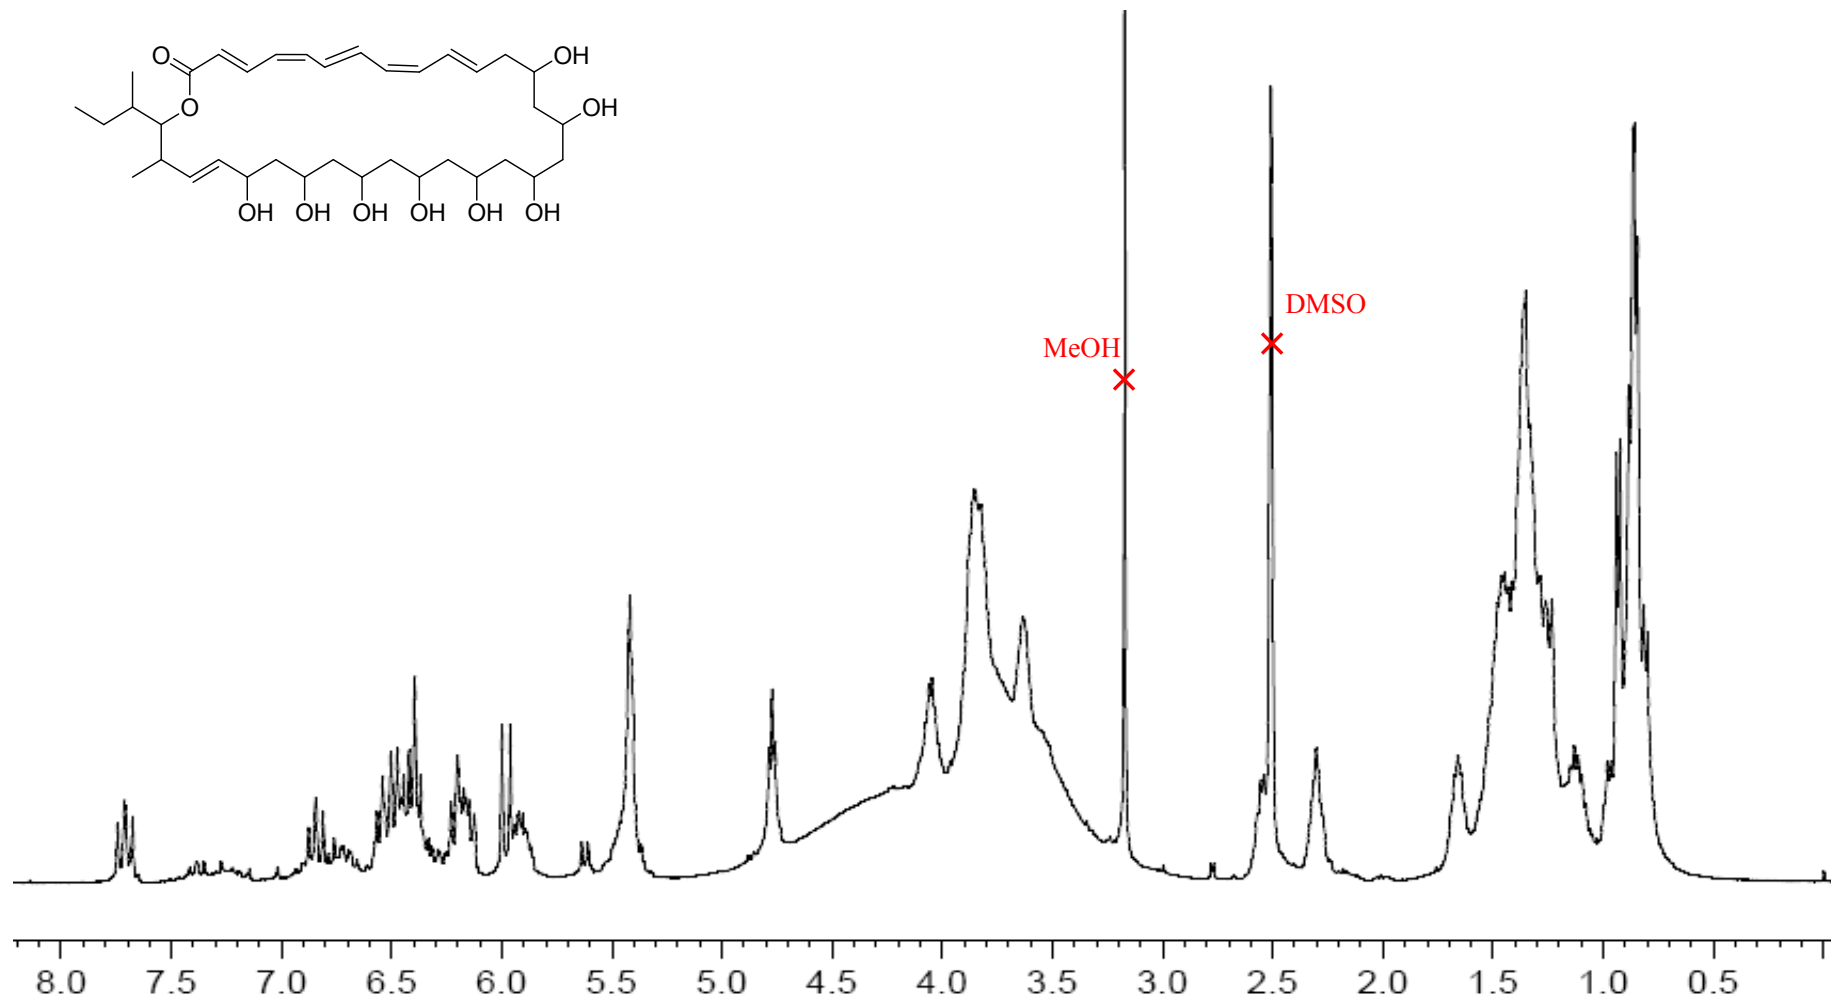





**Figure S36.** DEPT Spectrum (100 MHz) of reedsmycin E (**5**) in DMSO-d<sub>6</sub>

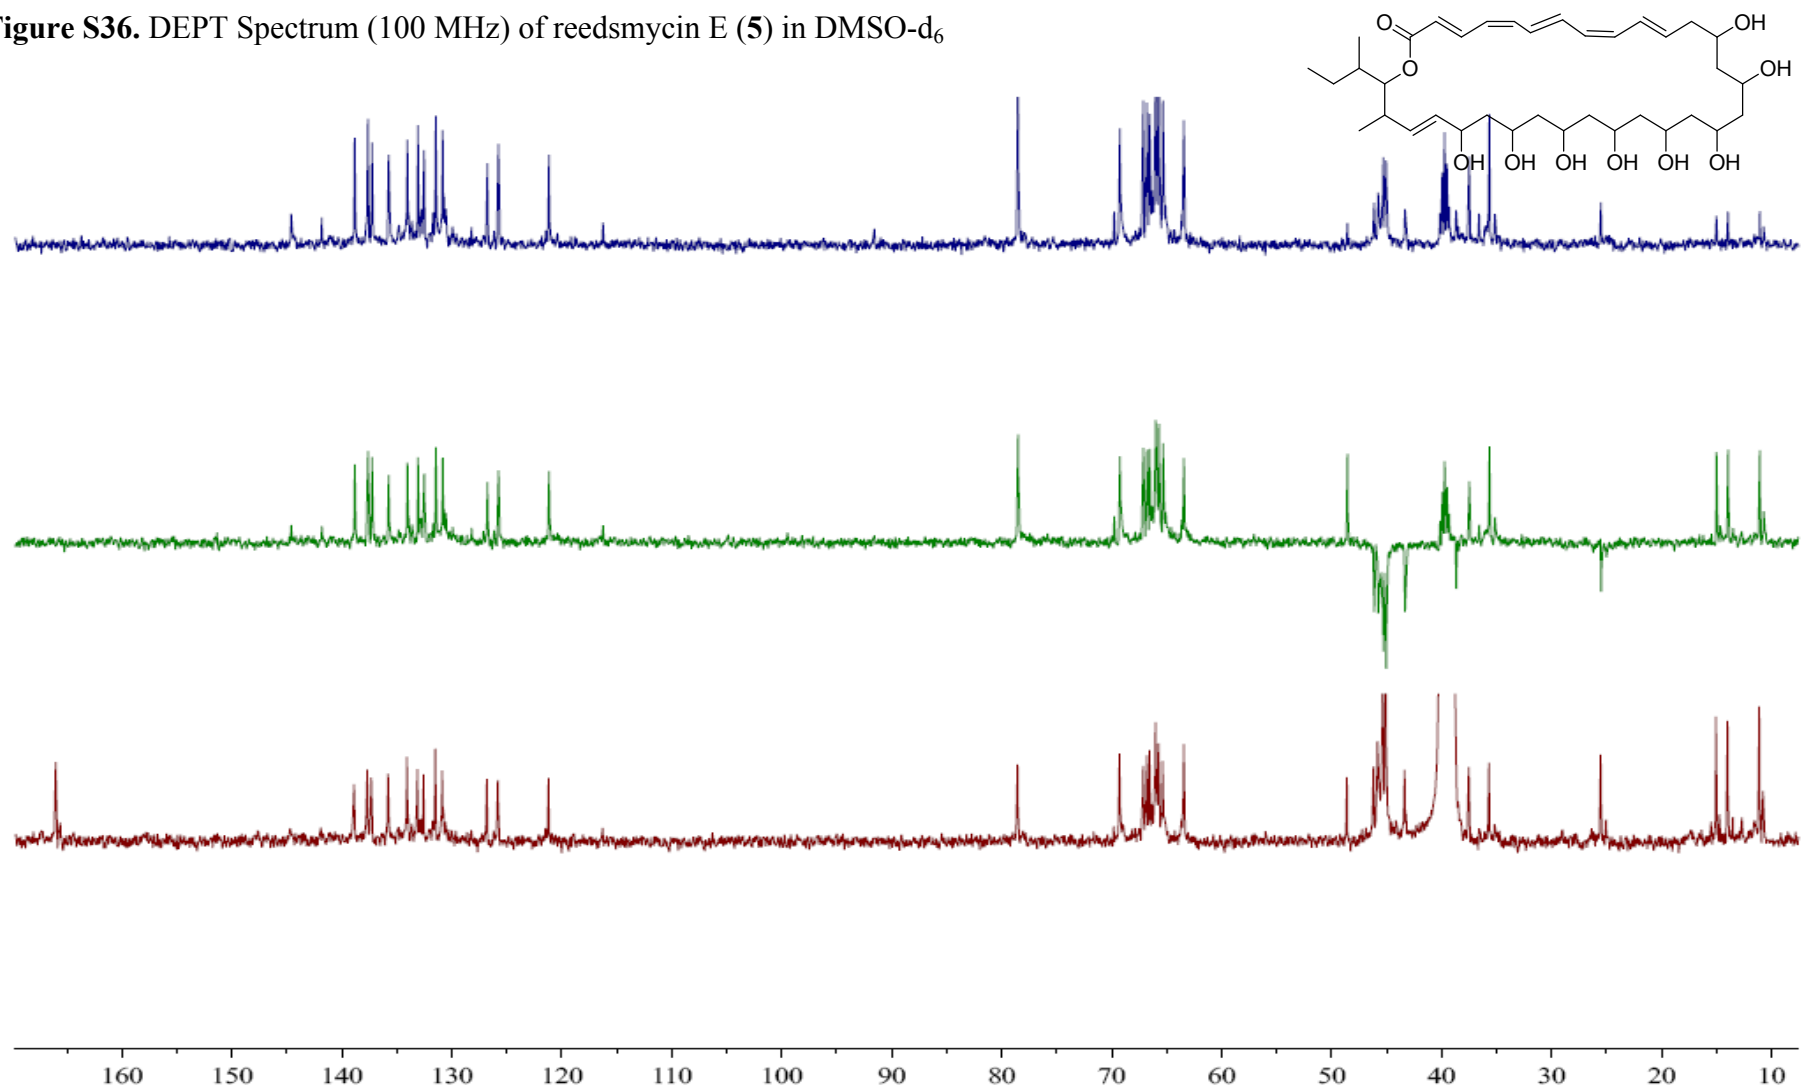

Figure S37. HMQC Spectrum of reedsmycin E (5) in DMSO-d<sub>6</sub>

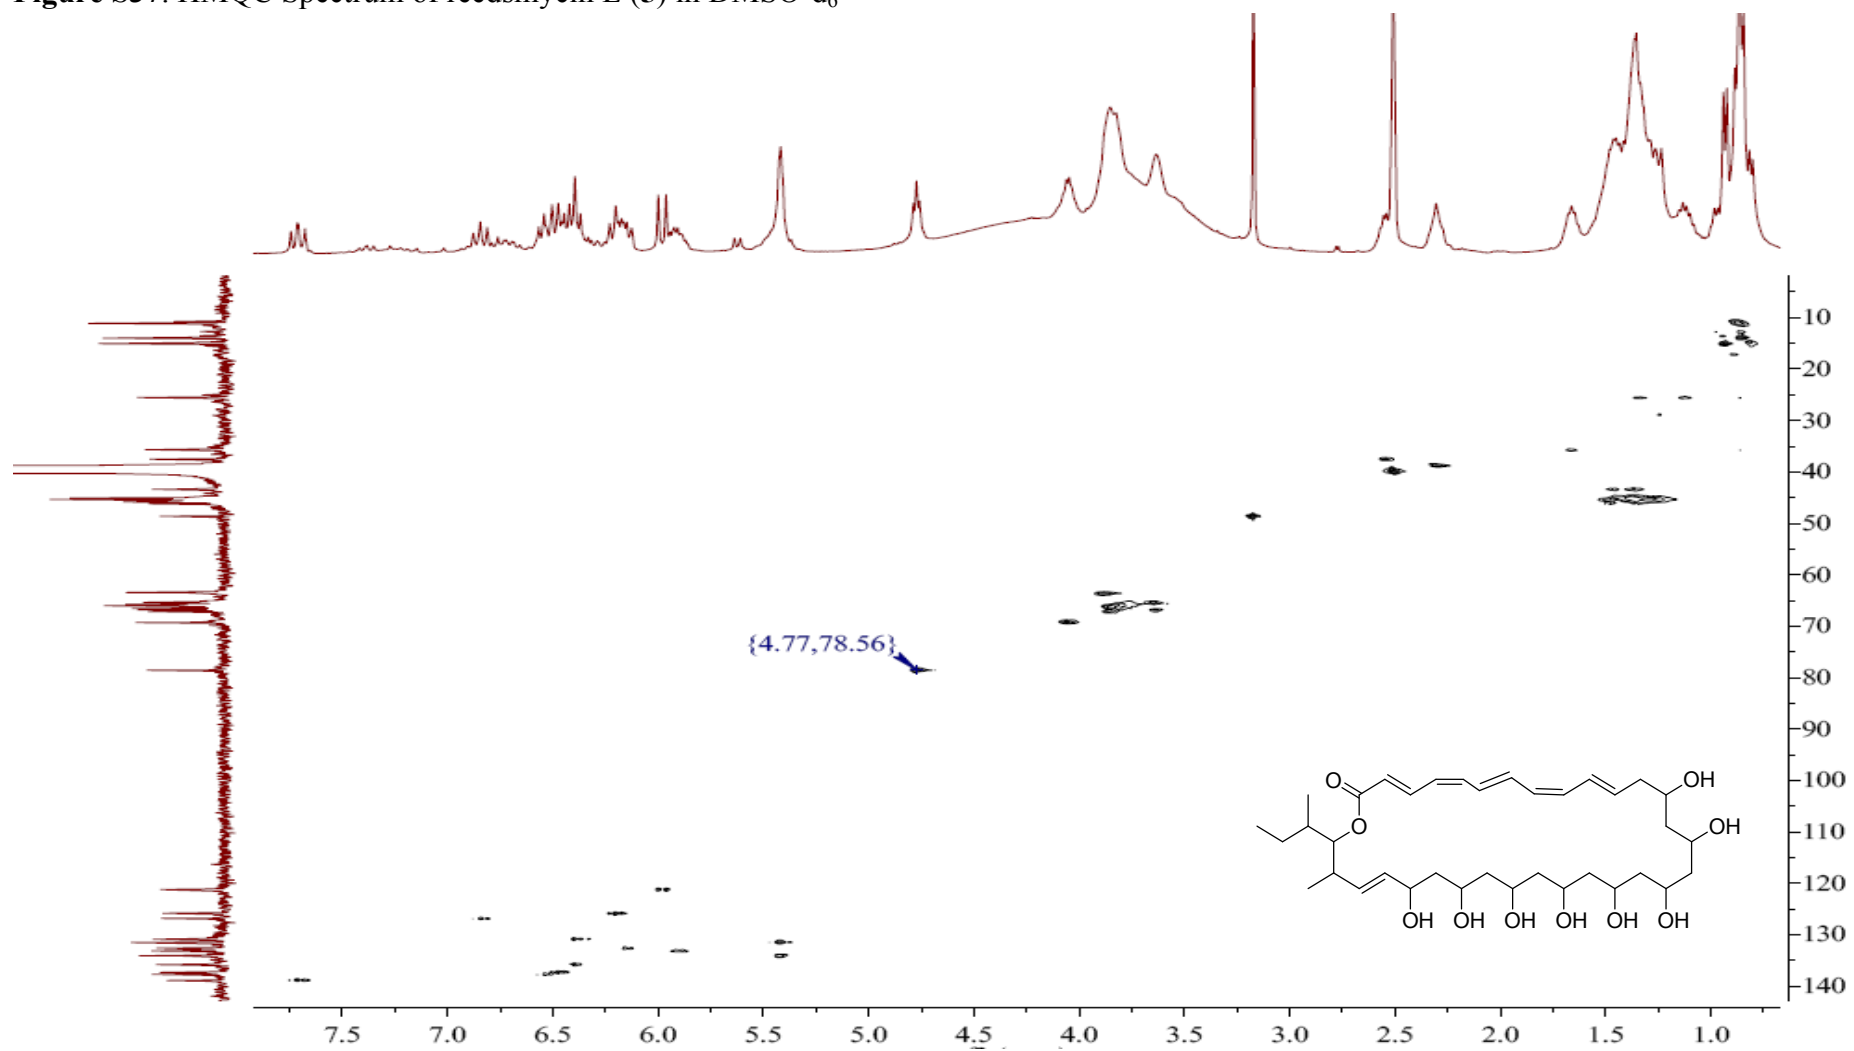





Figure S40. HRESIMS Spectrum of reedsmycin E (5)

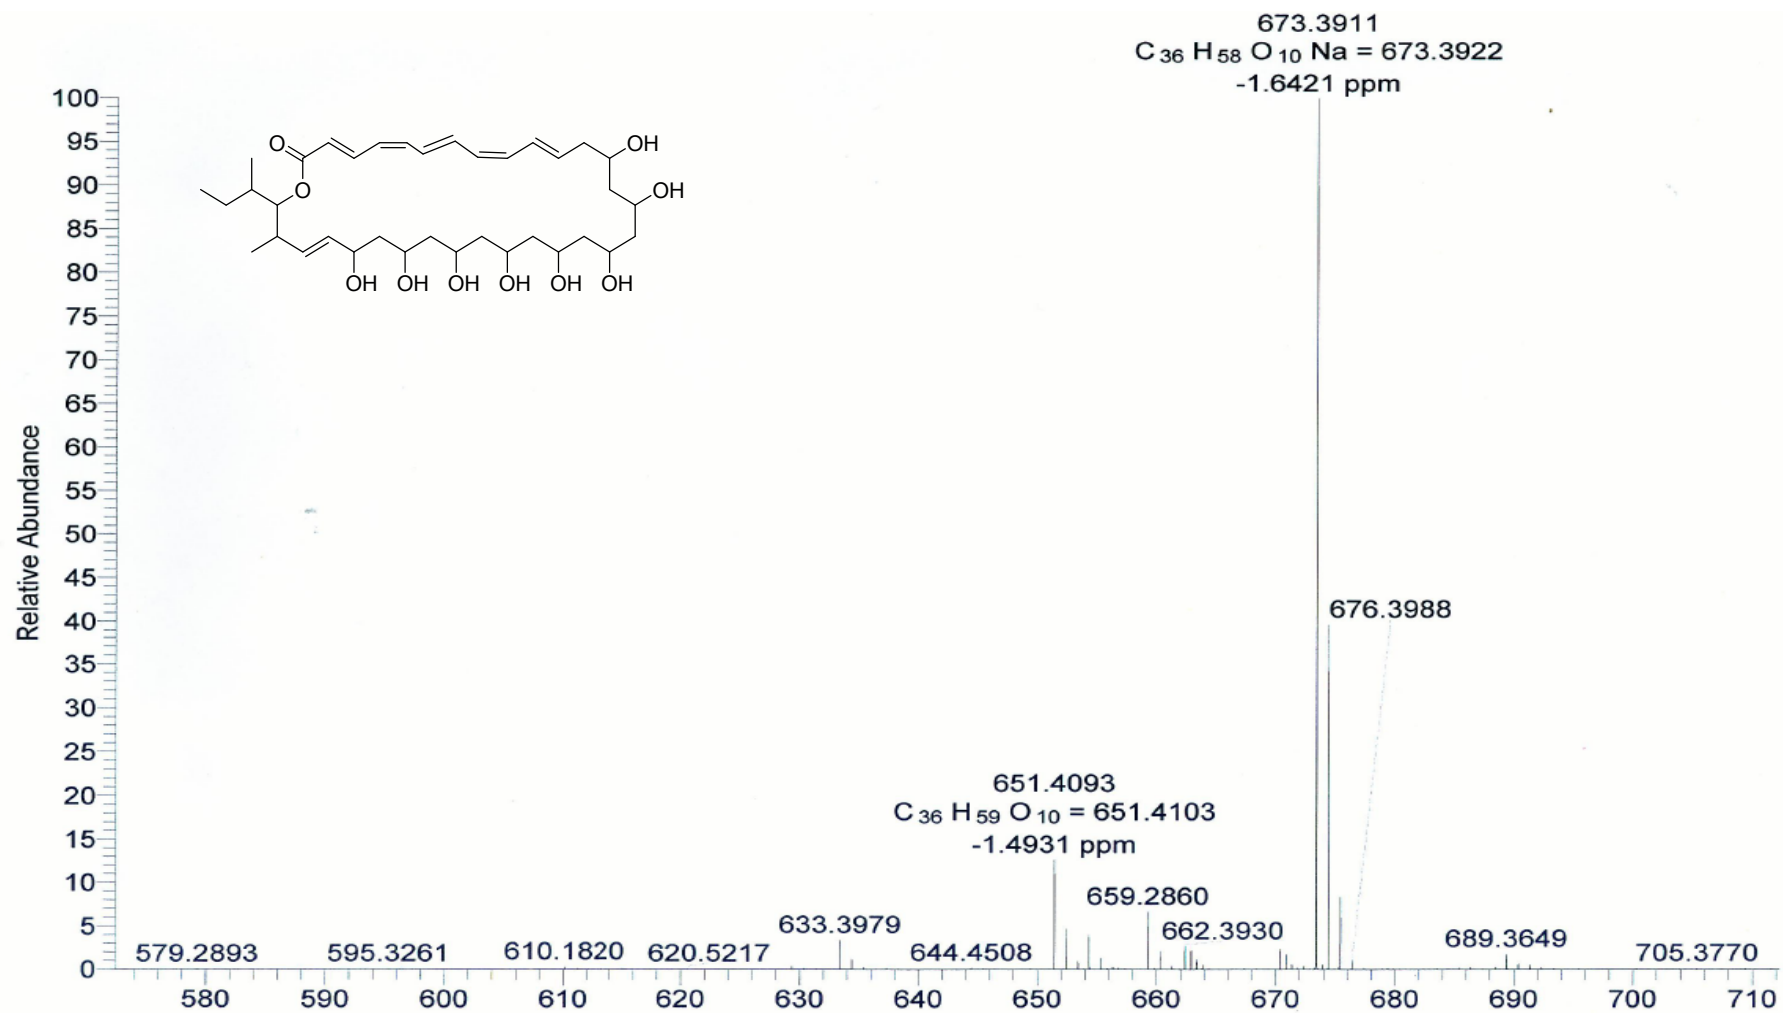

**Figure S41.** IR Spectrum of reedsmycin E (5)

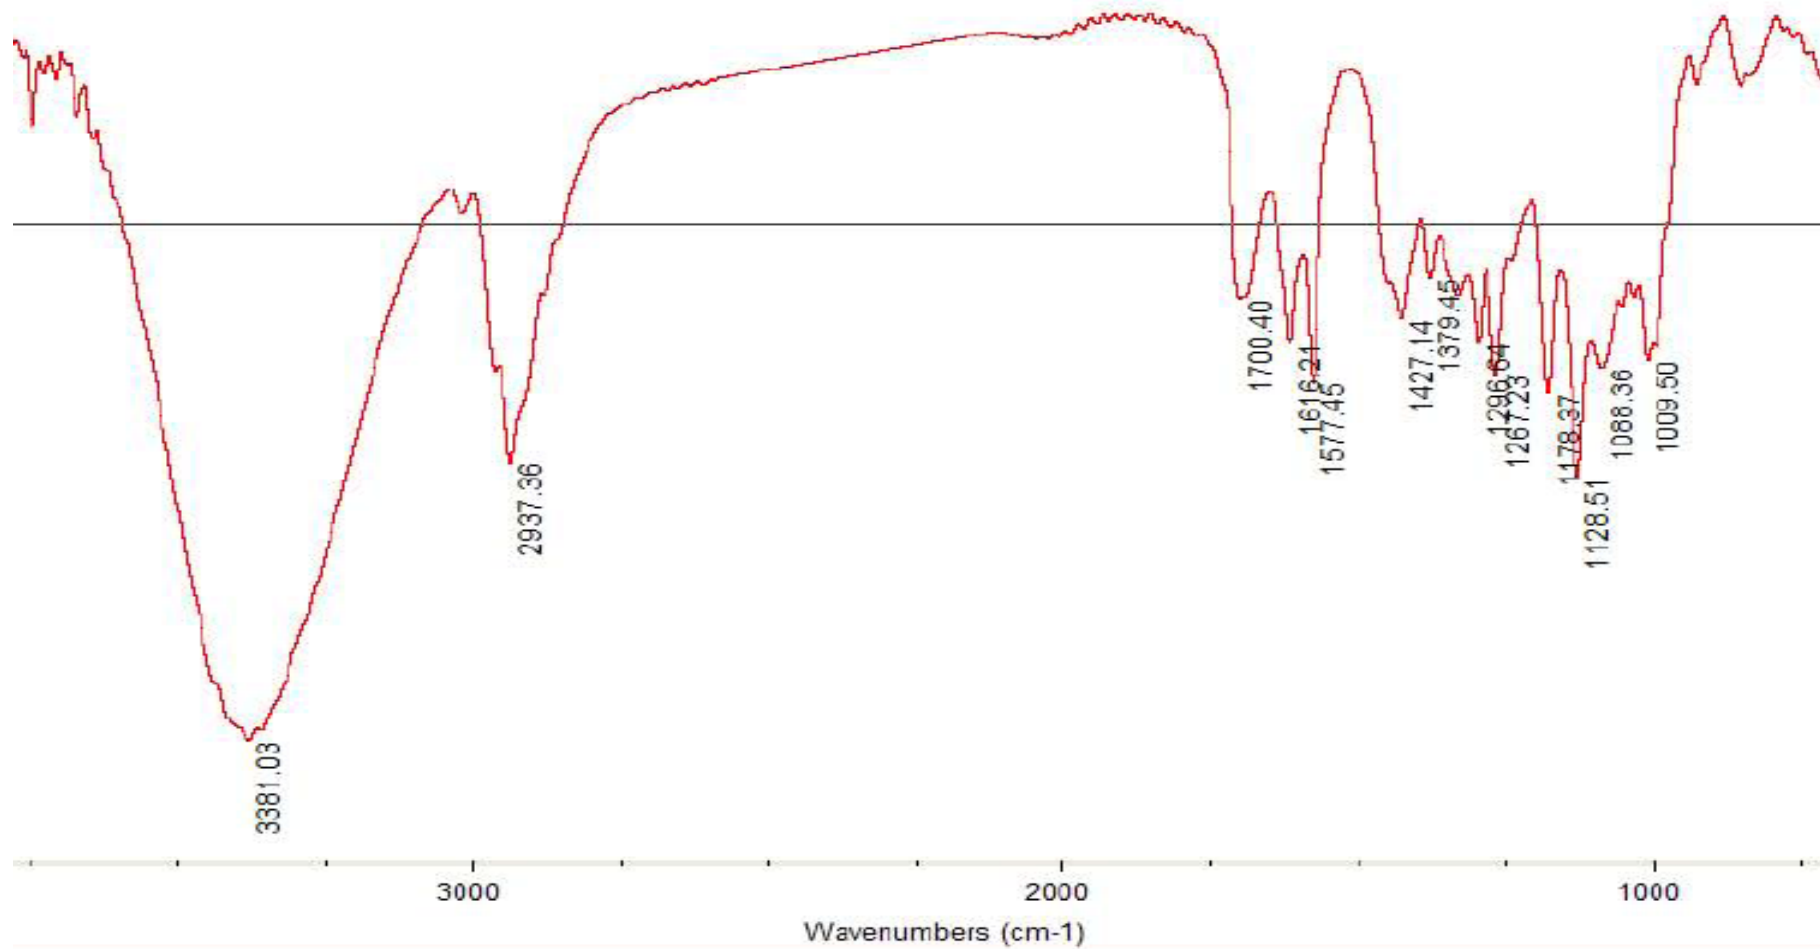

**Figure S42.**  $^1\text{H}$  NMR Spectrum (600 MHz) of reedsmycin F (**6**) in  $\text{DMSO-d}_6$

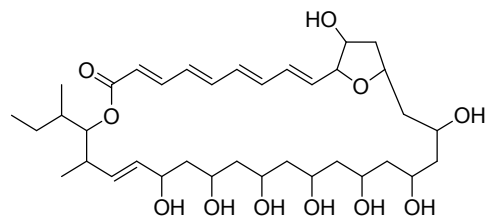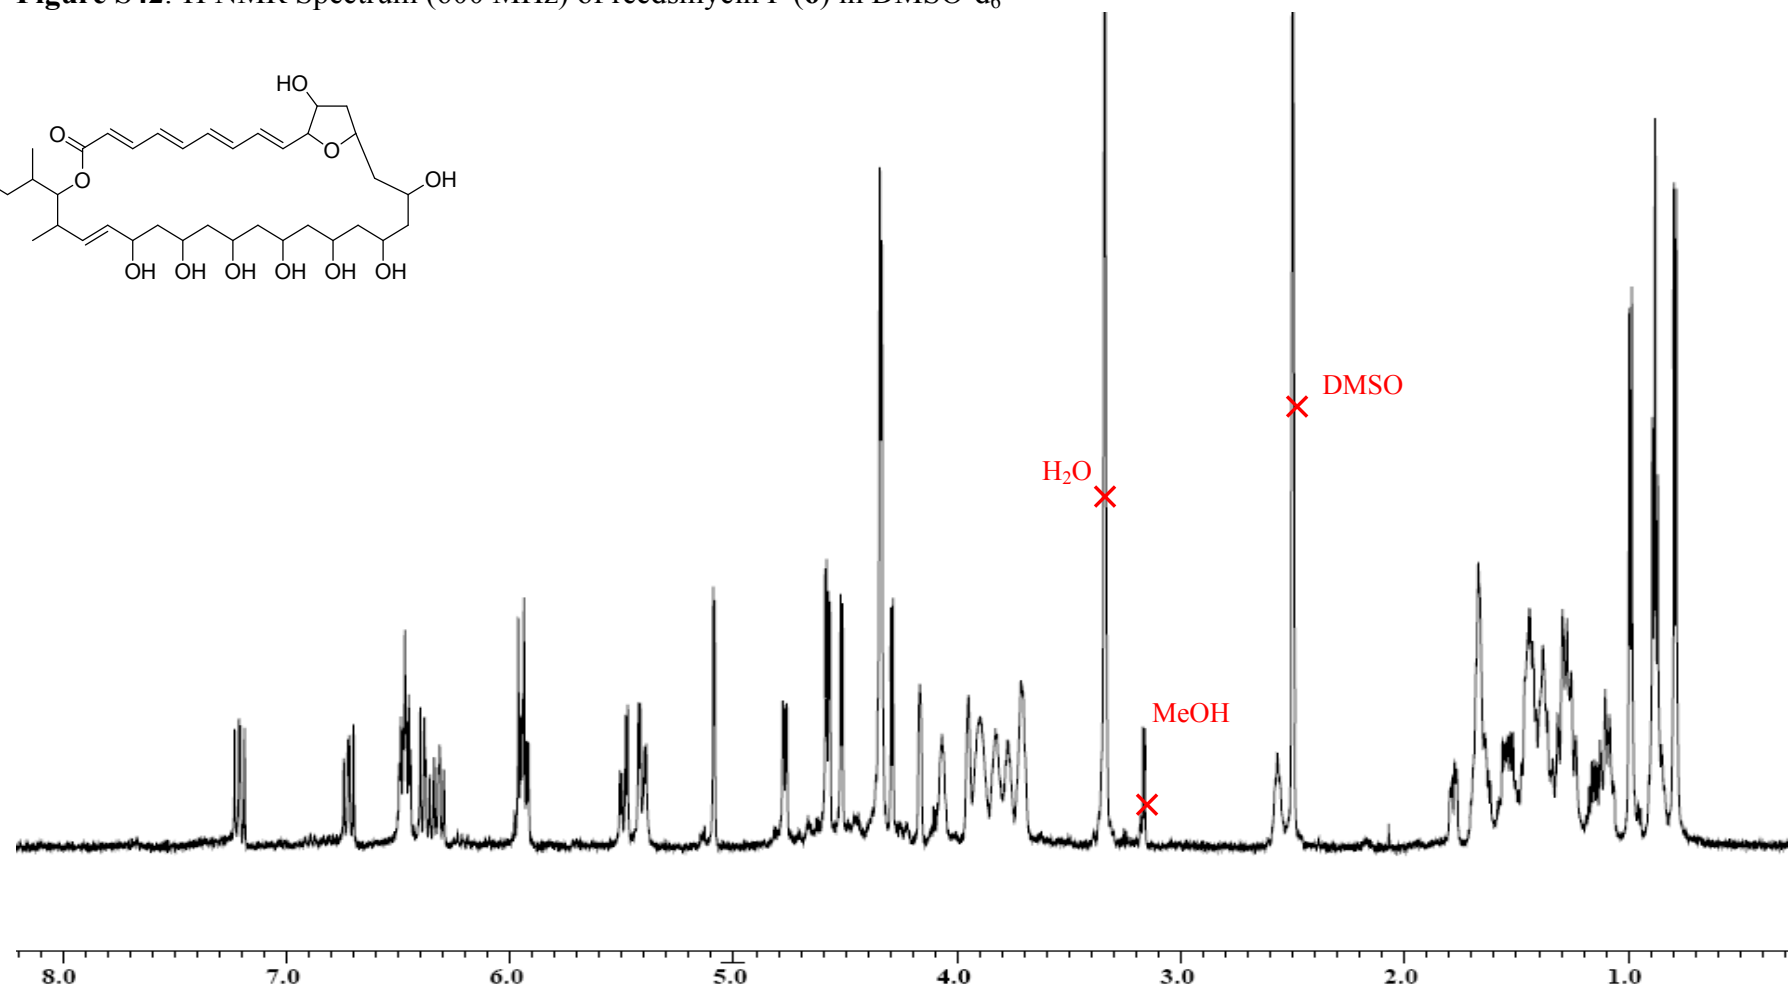

**Figure S43.**  $^{13}\text{C}$  NMR Spectrum (150 MHz) of reedsmycin F (**6**) in  $\text{DMSO-d}_6$

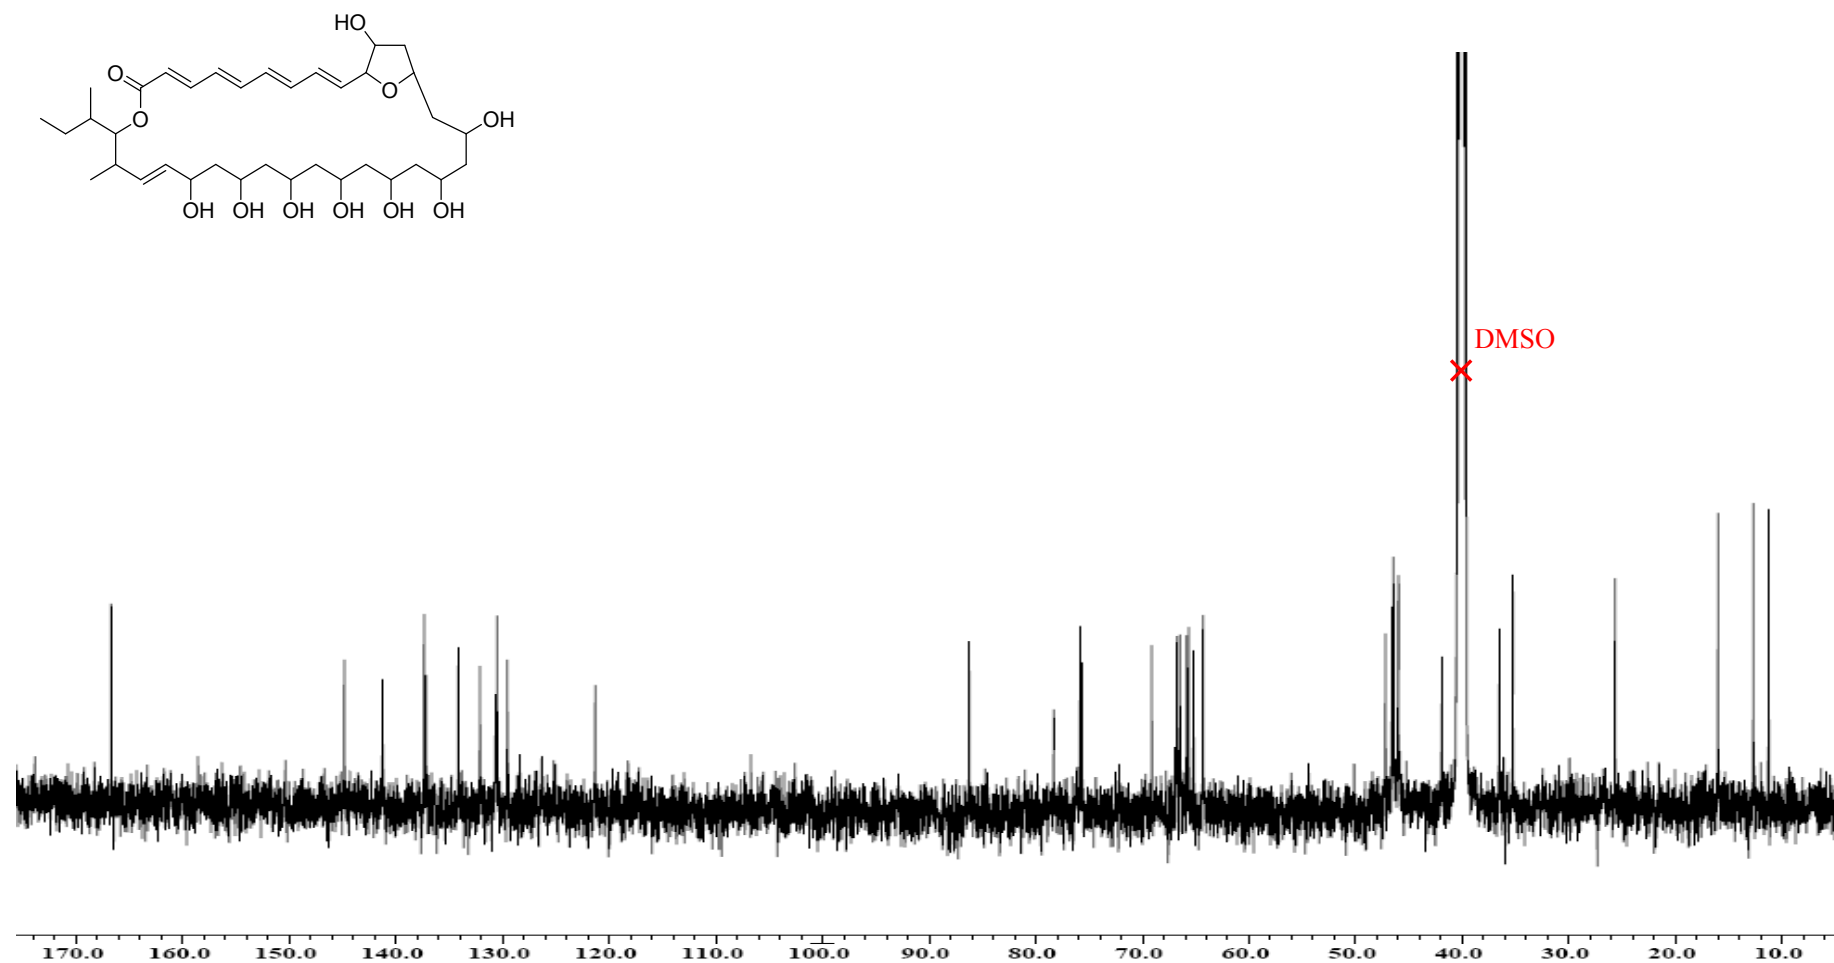





Figure S45. HMQC Spectrum of reedsmycin F (6) in DMSO-d<sub>6</sub>

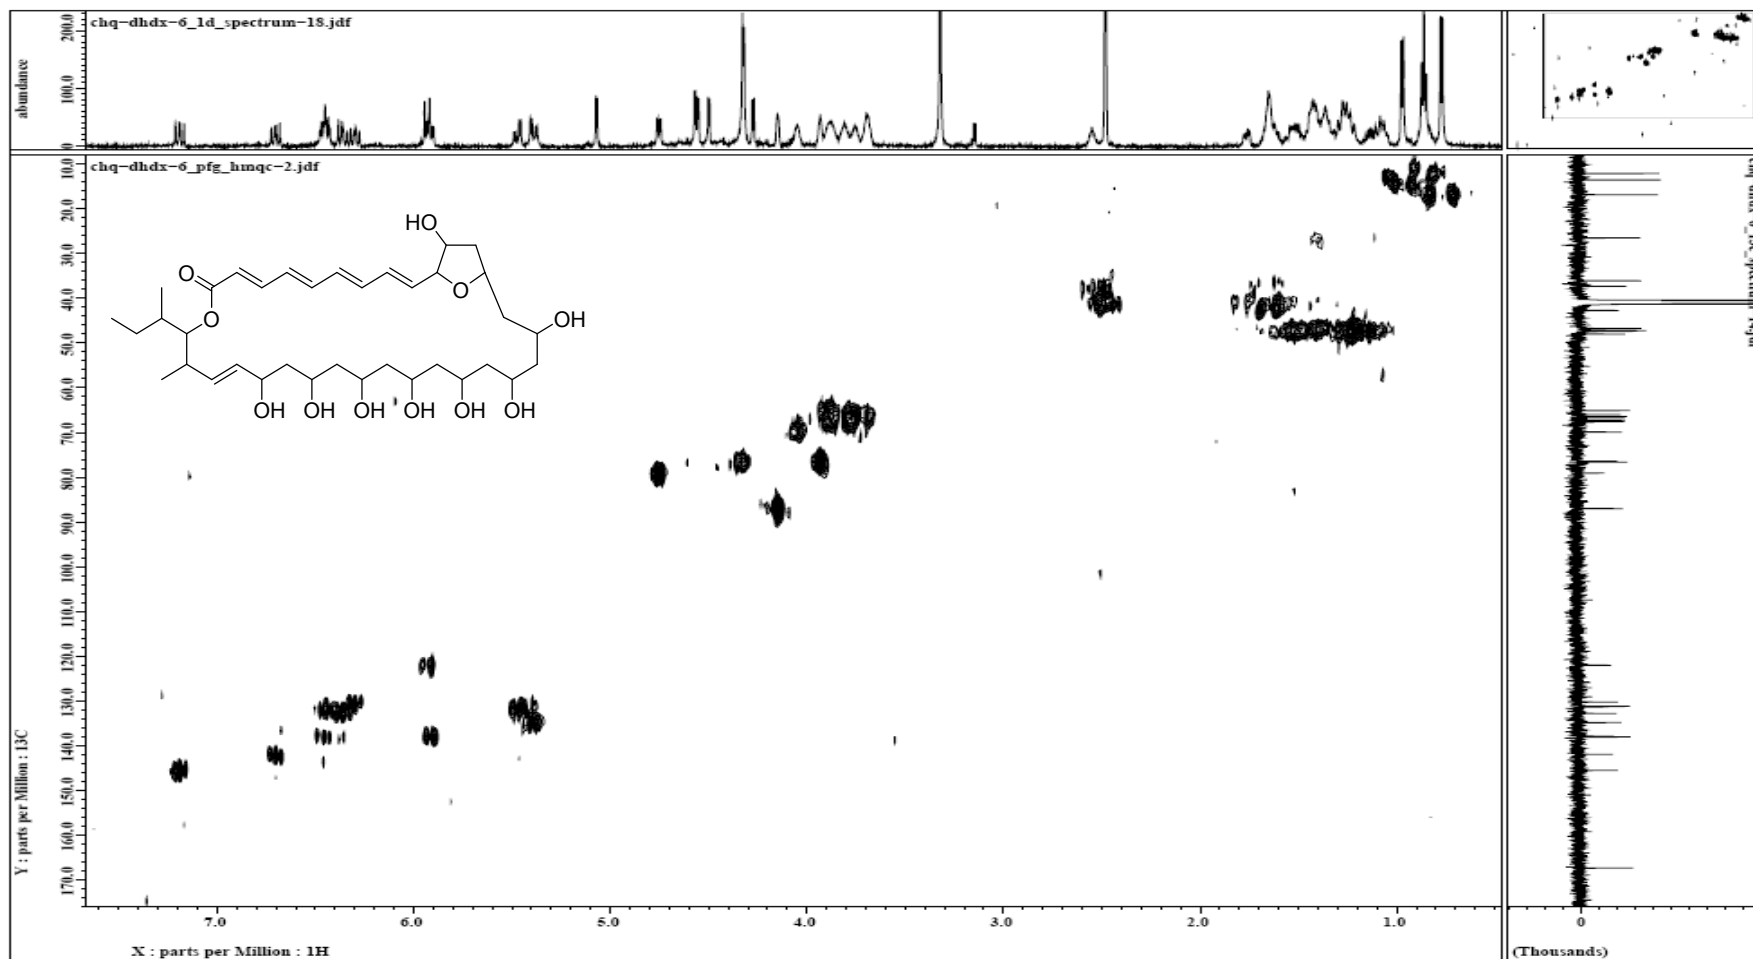

**Figure S46.**  $^1\text{H}$ - $^1\text{H}$  COSY Spectrum of reedsmycin F (6) in  $\text{DMSO-d}_6$

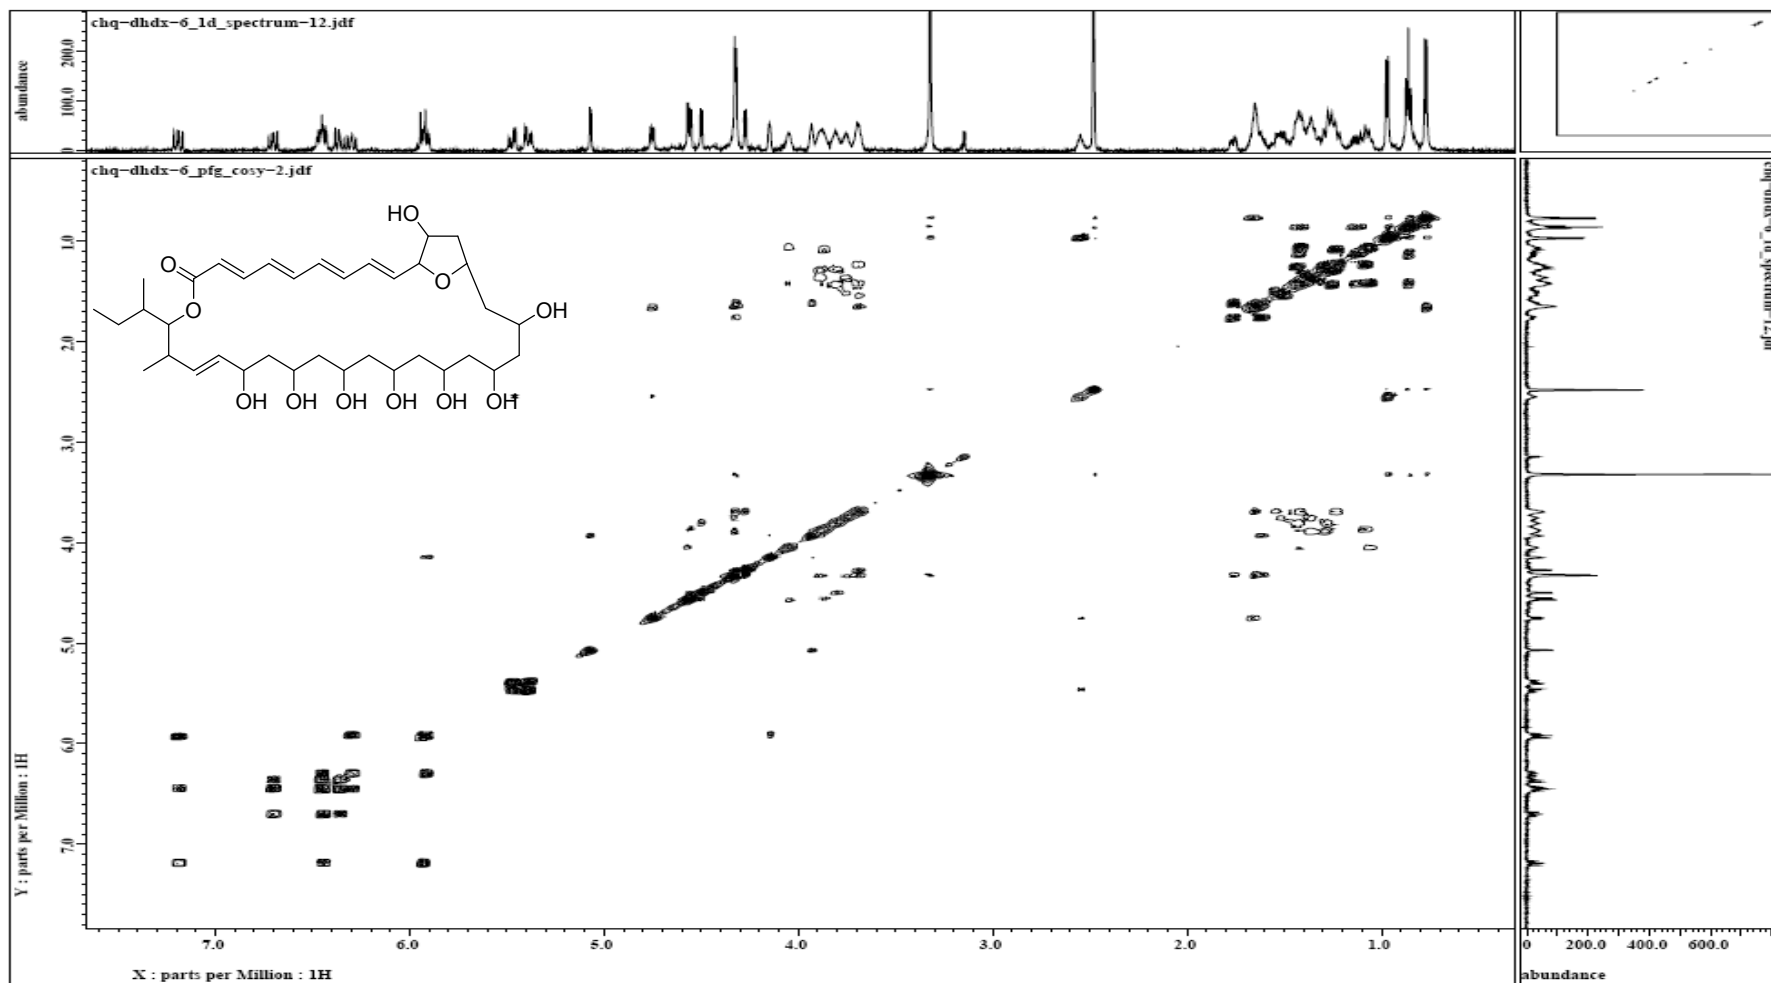

Figure S47. HMBC Spectrum of reedsmycin F (6) in DMSO-d<sub>6</sub>

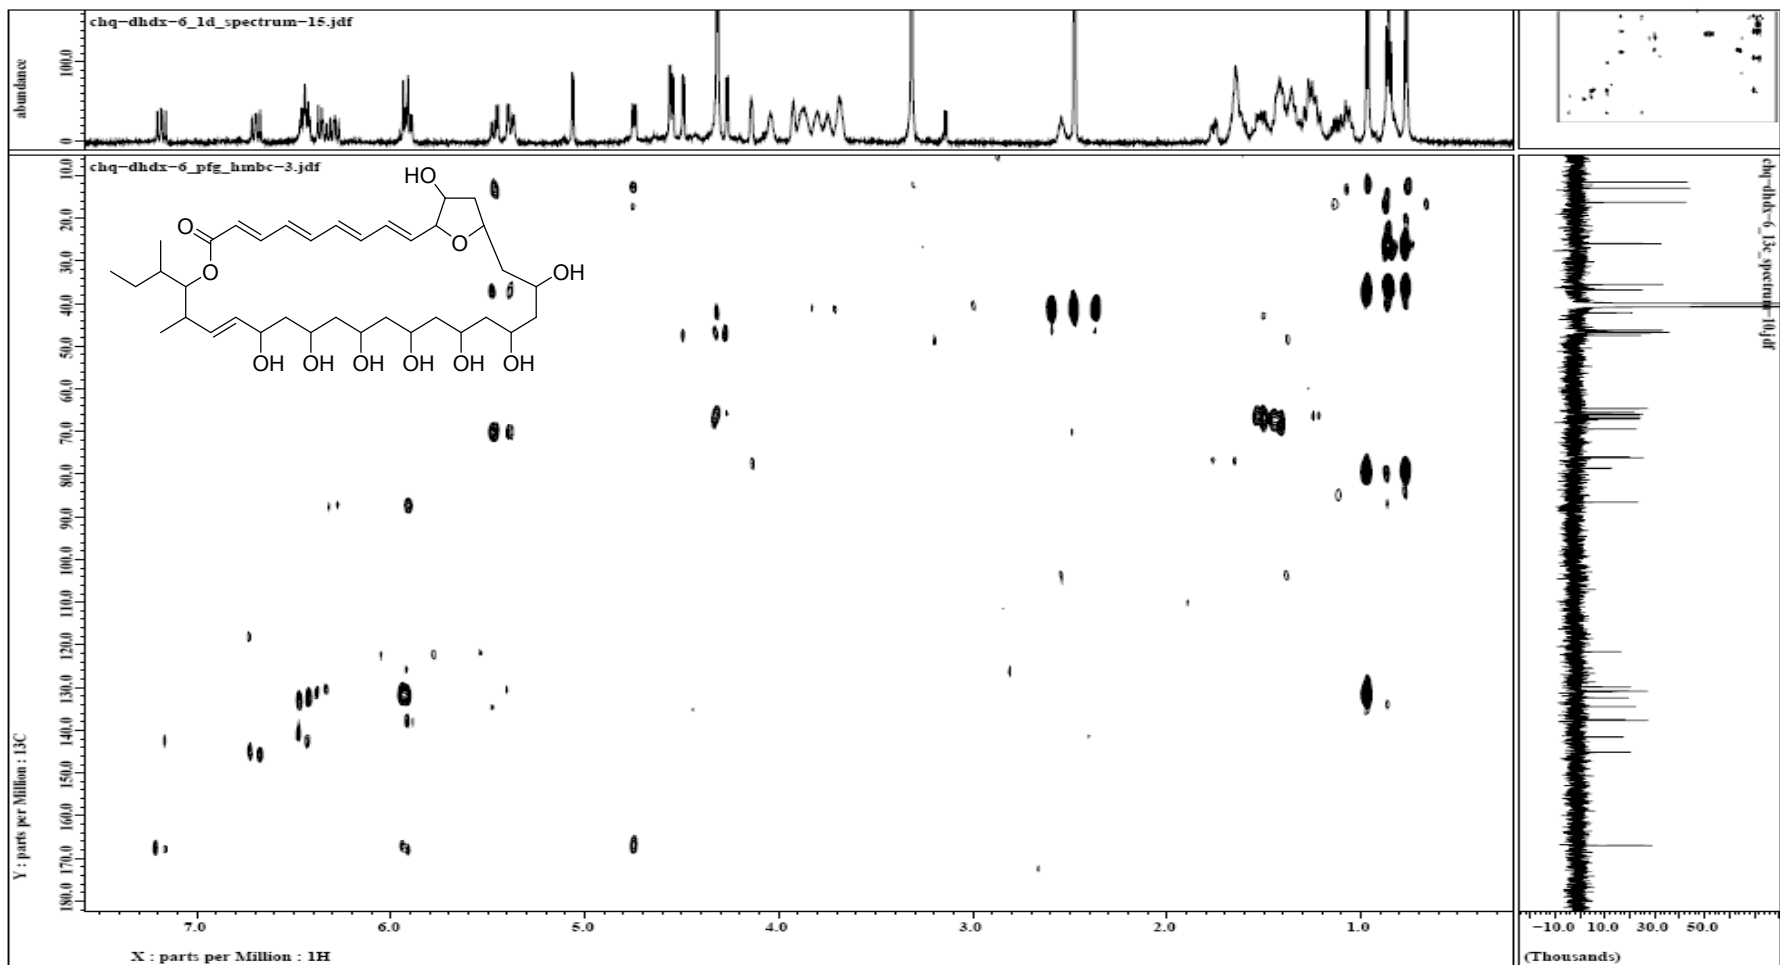

**Figure S48.** HRESIMS Spectrum of reedsmycin F (**6**)

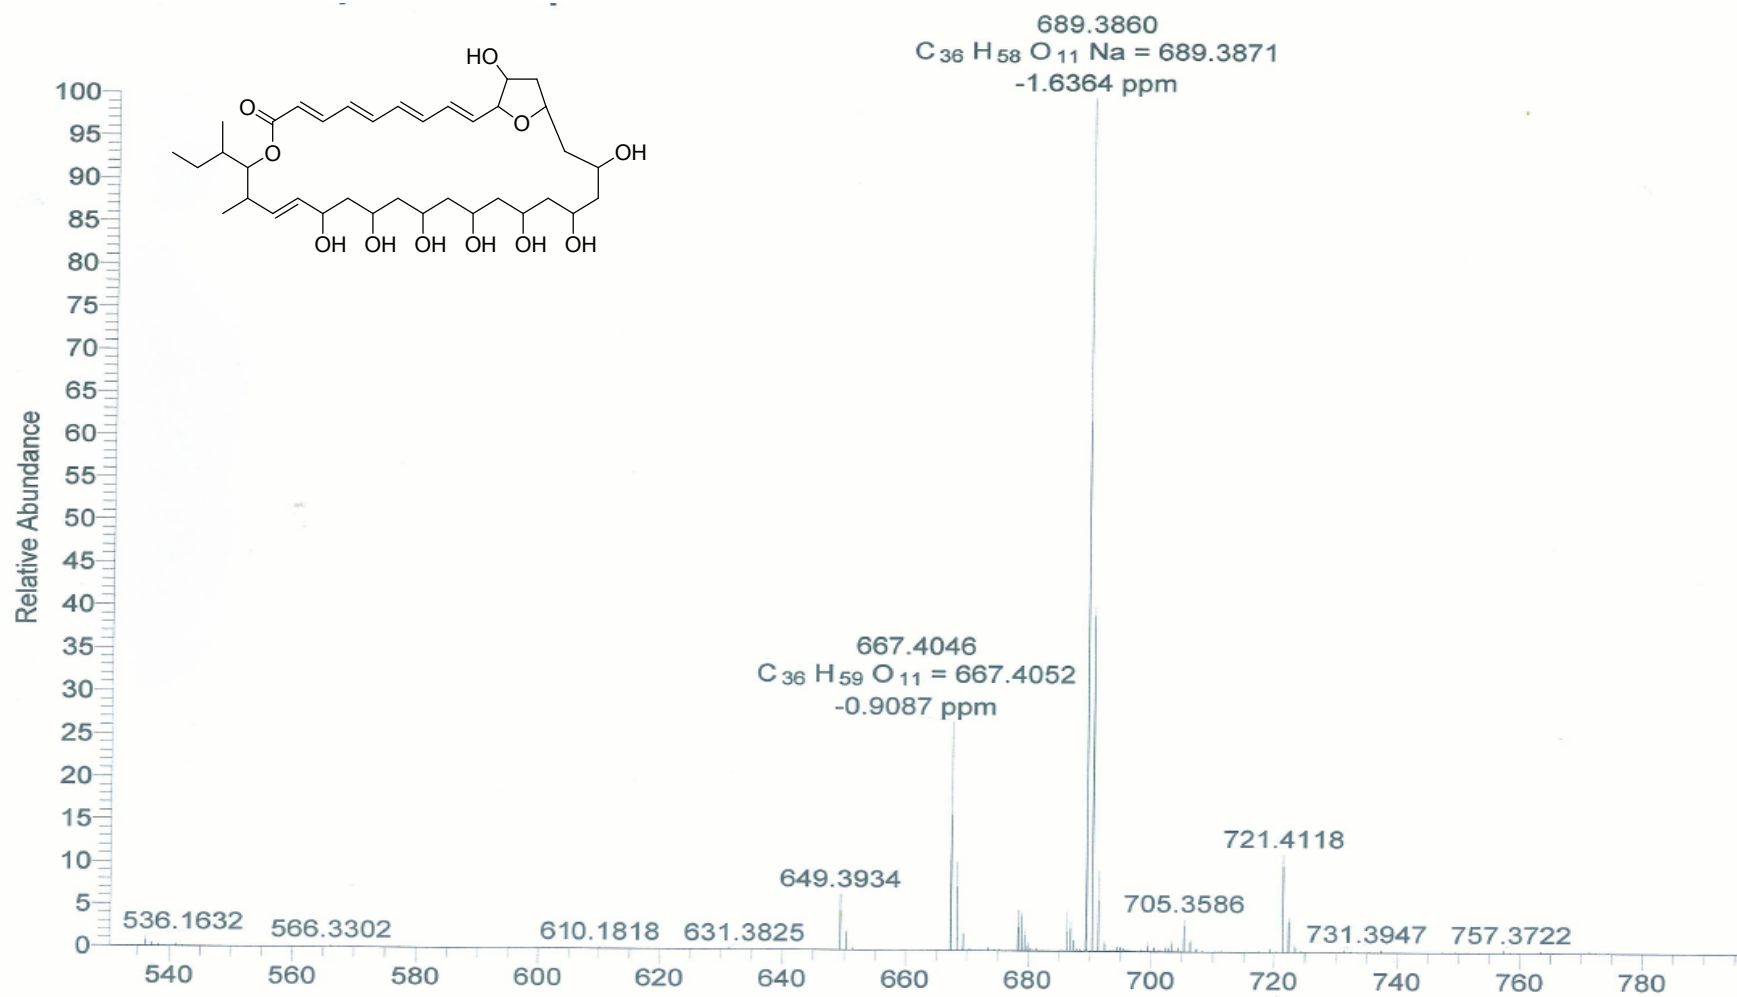

Figure S49. IR Spectrum of reedsmycin F (6)

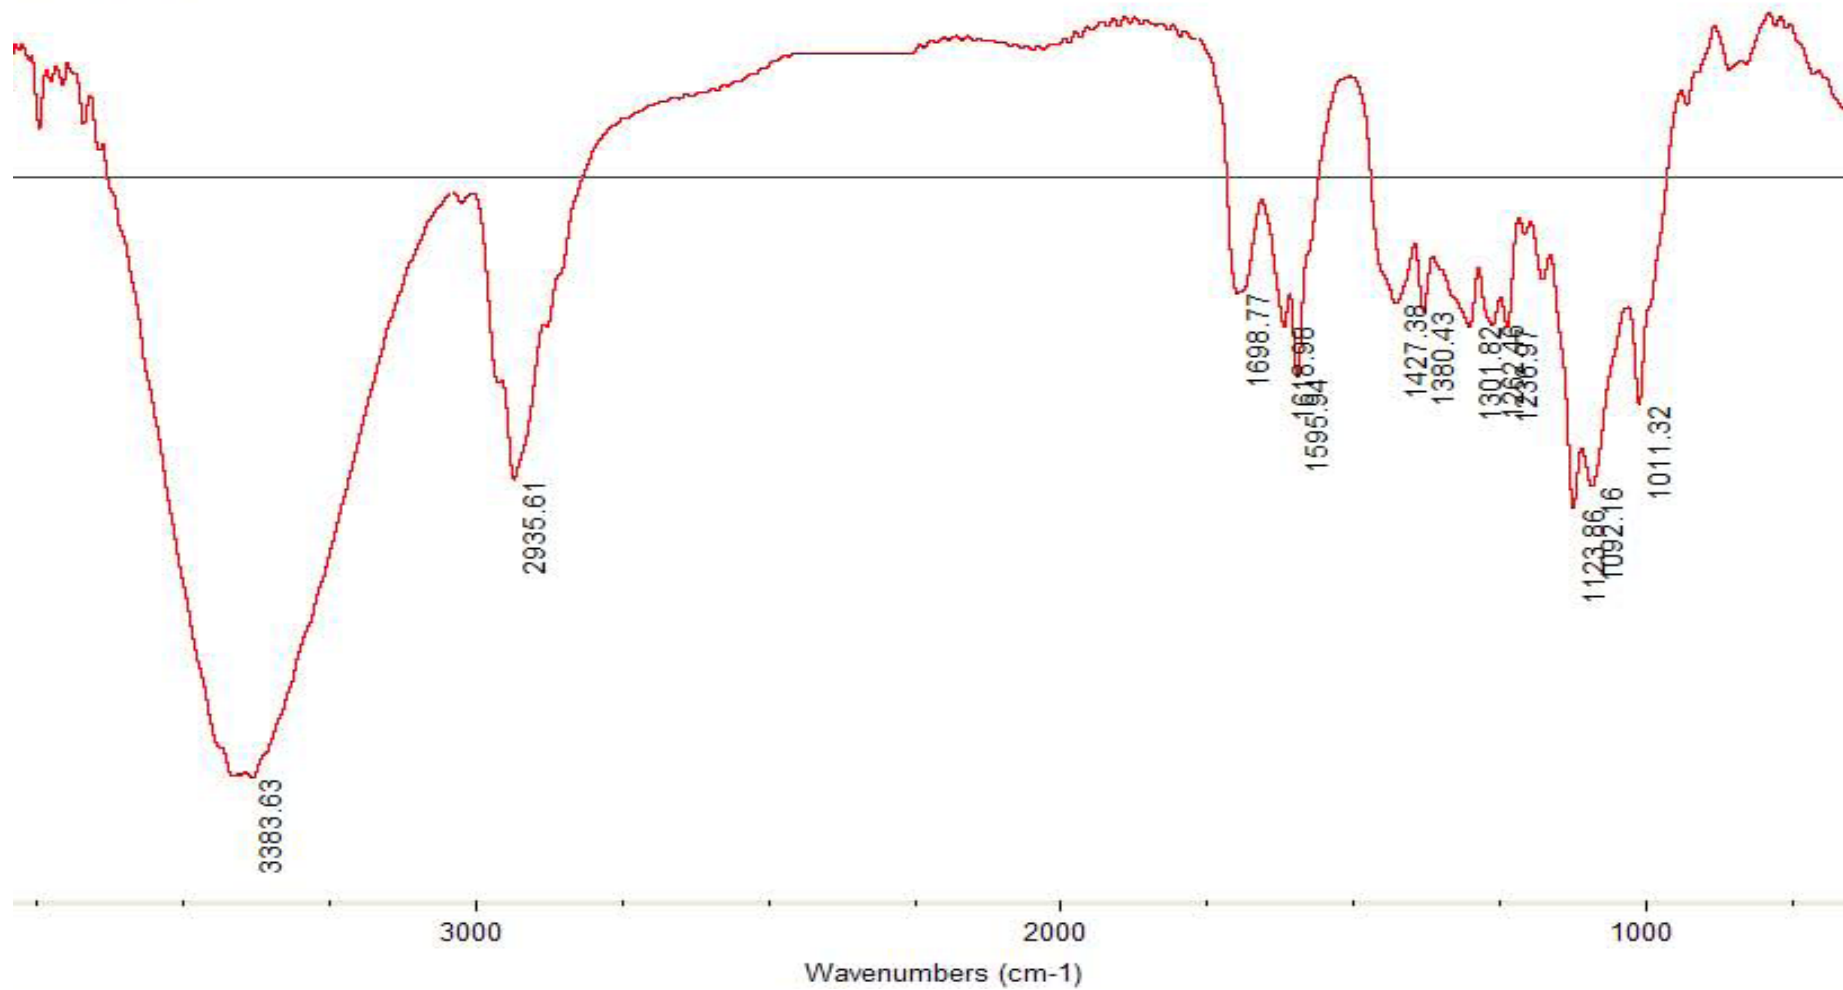

**Figure S50.** The HPLC profiles for the crude mixture and the fraction 7 (HPLC analysis by methanol: water = 5:95~100:0 from 5 min to 45 min, gradiently).

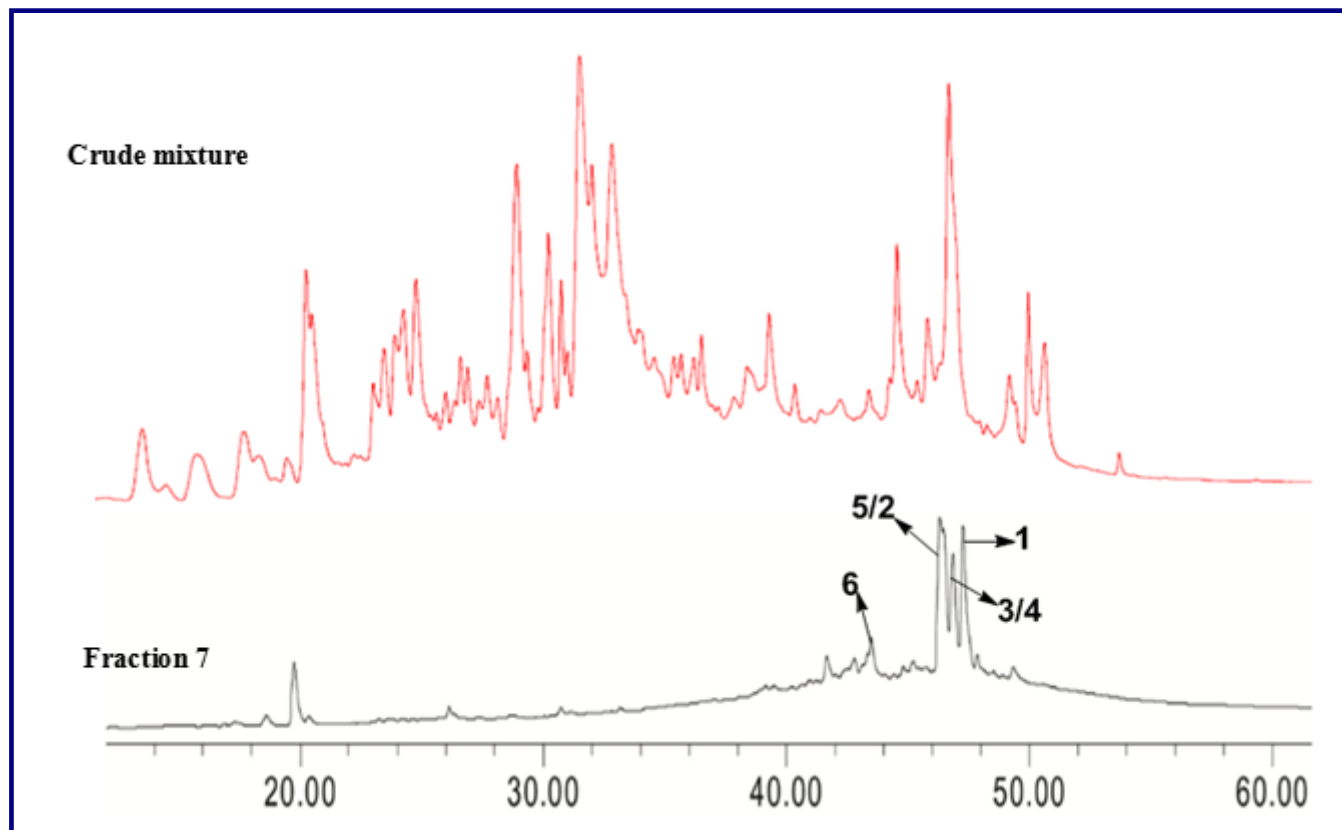

**Figure S51.** The TLC profiles for the crude extract and fraction 7.

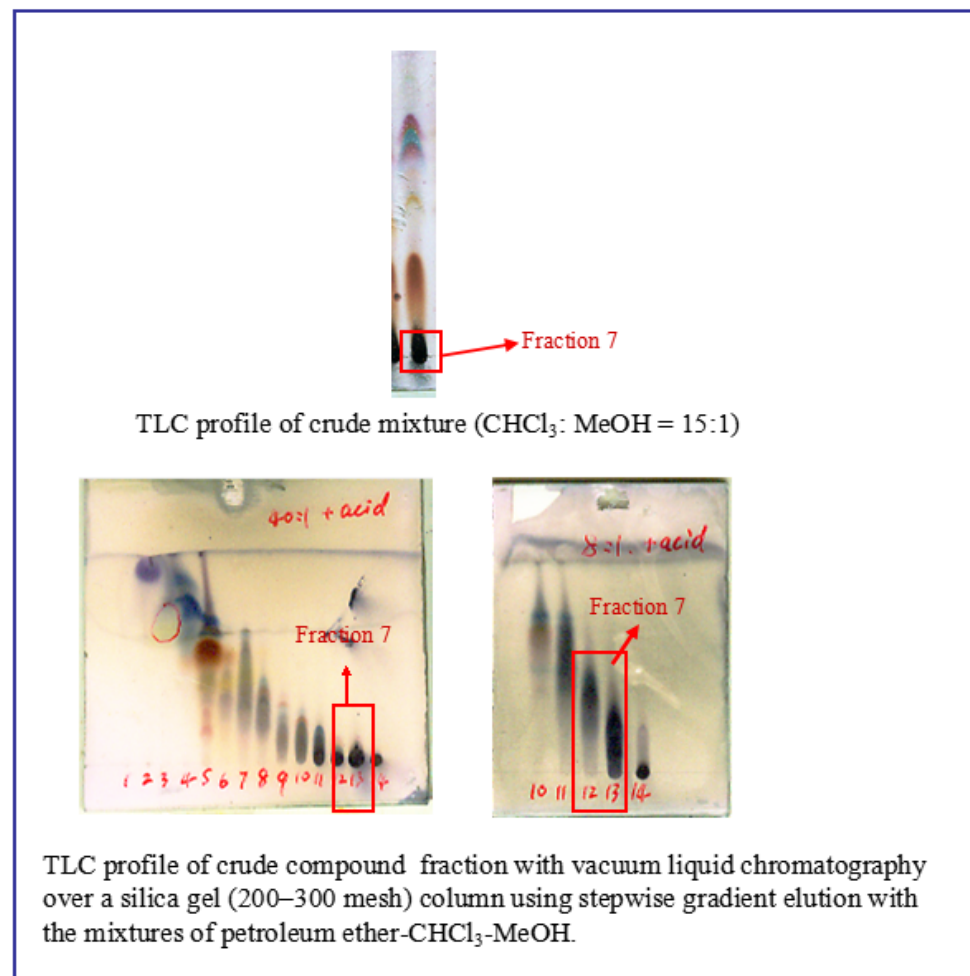

Supplement: c4ra15415k1.pdf [file c4ra15415k1.pdf]
